# Supplementary material
Source: publisher figshare collection journal article supplement (https://wiley.figshare.com/ndownloader/files/12820274)
Supplement: Supplementary file 1 [file 12820274]

## Sheet: Data Figure 1
Exposure type	Sampling time	Total (µg/L)
		Rep.1	Rep.2	Rep.3	Average	St.dev	Average over time	St.dev	% of nominal
Control	0h	<0,010	<LD	<LD	0	0	0	0
Control	3h	<LD	<LD	<LD	0	0
Control	7h	<LD	<0,010	<LD	0	0
Control	24h	<LD	<LD	<LD	0	0
Control	48h	0.011	<LD	<LD	0	0
C-Ag	0h	7.7	3.1	3.1	4.63333	2.65581	3.39333	1.78384	77.2222
C-Ag	3h	4.1	2.8	3.1	3.33333	0.680686			55.5556
C-Ag	7h	6.6	3.7	3.5	4.6	1.73494			76.6667
C-Ag	24h	1.9	1.9	1.9	1.9	2.71948e-16			31.6667
C-Ag	48h	4.4	1.5	1.6	2.5	1.64621			41.6667
AgNO3	0h	3	3.2	3.1	3.1	0.1	2.68667	0.801665	51.6667
AgNO3	3h	2.7	2.9	3.1	2.9	0.2			48.3333
AgNO3	7h	2.5	2.5	2.5	2.5	0			41.6667
AgNO3	24h	2.1	2.1	2.1	2.1	0			35
AgNO3	48h	5	1.8	1.7	2.83333	1.87705			47.2222

## Sheet: Data Figure 2
	Measures 110m-Ag in water samples, sample volum 20 mL.																			Size fractionations of Ag, as % of mean total measured 110m-Ag
	Exposure rout	Exposure type	Sampling time	Total (ccpm)					<0.22 µm (ccpm)					3kDa (ccpm) (hollow fiber)							C-Ag				AgNO3
				Rep.1	Rep.2	Rep.3	Average	St.dev.	Rep.1	Rep.2	Rep.3	Average	St.dev.	Rep.1	Rep.2	Rep.3	Average	St.dev.			Particulate	Colloidal/NP	Dissolved Ag		Particulate	Colloidal/NP	Dissolved Ag
	Water	Cont.	0h	1.8	0	2.1	1.3	1.13578												3h	32.0151	59.6003	8.38457		18.481	22.2702	59.2488
	Water	Cont.	4h	0	0	0	0	0	4.3	0	0			0	0	0.4				7h	46.1291	49.6786	4.19229		28.702	48.1968	23.1012
	Water	Cont.	8h	1.1	1.4	0.9	1.13333	0.251661												24h	61.0816	38.9184	0		52.3849	47.6151	0
	Water	Cont.	24h	8.5	0.4	0	2.96667	4.79618												48h	77.152	22.848	0		60.113	39.887	0
	Water	Cont.	48h	0.6	0	0.9	0.5	0.458258
	Water	C-Ag	0h	40.7	52.1	47.5	46.7667	5.73527
	Water	C-Ag	4h	38.6	51.7	65.9	52.0667	13.6537	33.5	33	30.8	32.4333	1.43643	3	2.8	6.2	4	1.90788
	Water	C-Ag	8h	79.4	86	58.4	74.6	14.4125	25.2	27.1	24.8	25.7	1.22882	3.4	1.8	0.8	2	1.31149
	Water	C-Ag	24h	28.1	34.8	31.4	31.4333	3.35012	21.2	16.1	18.4	18.5667	2.55408
	Water	C-Ag	48h	42.1	25.3	33.6	33.6667	8.4002	7.9	8.5	16.3	10.9	4.68615
			Over time				47.7067	17.3572
	Water	AgNO3	0h	48.7	54.5	50.6	51.2667	2.95691
	Water	AgNO3	4h	41.6	44.7	43.9	43.4	1.60935	36.7	28.1	33.3	32.7	4.33128	22.3	22.3	26.7	23.7667	2.54034
	Water	AgNO3	8h	43.1	46.1	43.7	44.3	1.58745	26.8	31.5	27.5	28.6	2.53574	12.9	9.7	5.2	9.26667	3.86825
	Water	AgNO3	24h	32.4	40.4	36.7	36.5	4.00375	20.1	16.7	20.5	19.1	2.08806
	Water	AgNO3	48h	24.1	22.9	28.3	25.1	2.83549	17.9	11.2	18.9	16	4.18688
			Over time				40.1133	9.88918

## Sheet: Data Figure 3
Dietary exposure
Organ: Bile
Time (h)	Control						S-Ag						C-Ag						Ag+
3	0	0	0	0	0	0	0.0009	0.0003	0	0.0001	0.001	0	0.0001	0	0.0002	0	0	0.0003	0	0.004	0.0005	0	0.0001	0.0011
7	0	0	0	0	0	0	0.0088	0	0.0002	0	0.0027	0	0.0002	0.001	0	0	0.0473	0.0007	0	0.0014	0	0.0013	0	0
24	0	0	0	0	0	0	0.0063	0.0062	0.0067	0.0018	0.0016	0.0046	0.0011	0.0003	0	0	0	0.0011	0.0026	0	0.0002	0	0.0028	0
48	0	0	0	0	0	0	0.0204	0.0249	0.0065		0.0087	0.004	0.0004	0.0013	0.0001	0	0.0002	0.0002	0.0086	0.0005	0.0362	0.008	0.0076	0.0134
Organ: Gill
Time (h)	Control						S-Ag						C-Ag						Ag+
3	0	0	0	0	0	0	0.0008	0.0003	0.0043	0.0003	0.0047	0.0014	0.0005	0	0.0001	0.0001	0.0001	0.0056	0.0002	0	0.0006	0.0229	0.0208	0.0001
7	0	0	0	0	0	0	0.0003	0.0003	0	0	0.0001	0.0006	0.0015	0	0	0.0006	0	0.0002	0	0.0003	0.0001	0.0003	0.0004	0.0005
24	0	0	0	0	0	0	0.0004	0.0002	0.0031	0.0001	0.0004	0.0004	0.0002	0.0006	0.0001	0.0002	0.0025	0	0.0002	0.001	0.0003	0.0002	0.0004	0
48	0	0	0	0	0	0	0.0008	0.0011	0.0001	0.0004	0.0009	0.0003	0	0	0.0001	0.0002	0	0.0002	0.0009	0	0.0005	0	0.0015	0.0026
Organ: Kidney
Time (h)	Control						S-Ag						C-Ag						Ag+
3	0	0	0	0	0	0	0	0.0002	0.0001	0.0004	0.0005	0.0001	0	0	0	0.0005	0	0.0001	0.0001	0.0012	0.0008	0.0018	0	0
7	0	0	0	0	0	0	0.0004	0.0004	0.0017	0.0001	0	0.0006	0.0003	0	0.0002	0.0004	0.0013	0	0.0013	0	0	0.0005	0	0
24	0	0	0	0	0	0	0.0003	0.0014	0.0002	0.0002	0	0.0003	0.0008	0.0011	0	0.0001	0.0001	0	0.0001	0	0.0005	0.0007	0.0007	0
48	0	0	0	0	0	0	0.0003	0.0009	0.0009	0.0015	0	0.002	0	0	0	0	0.0005	0	0	0	0.001	0	0.00012	0.0001
Organ: Liver
Time (h)	Control						S-Ag						C-Ag						Ag+
3	0	0	0	0	0	0	0.001	0.0005	0.0006	0.0003	0.0002	0.0007	0.0001	0.0002	0	0	0	0.0001	0.0007	0.0009	0.0016	0.0002	0.0003	0.0003
7	0	0	0	0	0	0	0.0044	0.0034	0.0015	0.0028	0.0016	0.0007	0.0001	0.0006	0.0005	0.0014	0.0003	0.0004	0.003	0.0024	0.0028	0.0025	0.0028	0.0008
24	0	0	0	0	0	0	0.0077	0.0291	0.0276	0.0199	0.013	0.0205	0.0005	0.0004	0.0014	0.0021	0.0008	0.0001	0.0097	0.0148	0.0132	0.0115	0.0076
48	0	0	0	0	0	0	0.0386	0.0203	0.0149	0.0352	0.0204	0.0322	0.0029	0.0045	0.001	0.0021	0.0014	0.0057	0.0162	0	0.0226	0.0208	0.0358	0.0436
Waterborne exposure
Organ: Bile
Time (h)	Control						S-Ag						Ag+
3	0	0	0	0	0	0	0	0	0	0	39	0	8	0	0	8	0	0
7	0	0	0	0	0	0	43	4	20	19	126	0	0	5	0	0	42	0
24	0	0	0	0	0	0	0	41	79	75	73	27	242	73	106	156	143	130
48	0	0	0	0	0	0	283	132	13	249	280	88	53	347	186	497	515	783
Organ: Gill
Time (h)	Control						S-Ag						Ag+
3	0	0	0	0	0	0	232	233	308	320	218	17	303	672	590	658	607	1319
7	0	0	0	0	0	0	207	109	215	257	191	288	565	516	799	487	799	658
24	0	0	0	0	0	0	192	158	201	181	142	152	525	828	478	615	1018	666
48	0	0	0	0	0	0	169	77	106	113	231	123	426	612	453	703	531	566
Organ: Kidney
Time (h)	Control						S-Ag						Ag+
3	0	0	0	0	0	0	1	5	0	0	0	0	0	0	0	4	84	21
7	0	0	0	0	0	0	0	5	18	0	14	8	0	15	52	19	52	7
24	0	0	0	0	0	0	1	5	41	18	0	0	0	22	27	61	2	28
48	0	0	0	0	0	0	34	24	48	9	9	13	31	46	114	42	54	74
Organ: Liver
Time (h)	Control						S-Ag						Ag+
3	0	0	0	0	0	0	13	7	14	4	0	21	2	35	30	17	24	19
7	0	0	0	0	0	0	44	0	45	33	32	30	95	70	70	57	25	63
24	0	0	0	0	0	0	142	100	26	190	163	153	203	399	231	256	359	331
48	0	0	0	0	0	0	295	134	187	315	265	160	521	605	503	471	435	328

## Sheet: Diet, tissue bioaccumulation
																	Decay correction performed
Experiment code	Exposure rout	Exposure type	Sampling time	Fish nr	Fish nr	Organ	Organ	Tube nr	Tube before weight (g)	Tube nr	Tube, after weight (g)	Weight organ (g)	ccpm	ccpm for the controls	Weight fish (g)	Length fish (cm)	Half life 110m-ag	Start exposure	Date samples measured	Days past since start of exp.	Decay corrected ccpm	ccpm/g tissue	Avg. Ccpm/g tissue	St.dev. Ccpm/g tissue		Transfer Factor (ccpm/g tissue)/(avg ccpm/g food)	Avg Transfer factor	St.dev.
E2-13	Diet	Ag+	3	1	1	Bi	Bile	166	1.0143	166	1.1096	0.0953	0		30.08	15.4	249.9	2013-02-18	2013-03-08	18	0	0	24.4237	40.3603		0	0.000949339	0.00156879
E2-13	Diet	Ag+	3	2	2	Bi	Bile	175	1.0074	175	1.0327	0.0253	2.5		25.12	14.9		2013-02-18	2013-03-08	18	2.62798	103.873				0.00403751
E2-13	Diet	Ag+	3	3	3	Bi	Bile	184	1.0164	184	1.0894	0.073	0.9		14.65	12.5		2013-02-18	2013-03-08	18	0.946075	12.9599				0.000503748
E2-13	Diet	Ag+	3	4	4	Bi	Bile	193	1.0019	193	1.0678	0.0659	0		28.79	15.1		2013-02-18	2013-03-08	18	0	0				0
E2-13	Diet	Ag+	3	5	5	Bi	Bile	202	1.0362	202	1.0861	0.0499	0.1		14.01	12.6		2013-02-18	2013-03-08	18	0.105119	2.1066				8.18829e-05
E2-13	Diet	Ag+	3	6	6	Bi	Bile	211	1.006	211	1.0517	0.0457	1.2		15.66	12.4		2013-02-18	2013-03-08	18	1.26143	27.6025				0.0010729
E2-13	Diet	C-Ag	3	7	1	Bi	Bile	112	1.0061	112	1.0792	0.0731	0.2		24.31	14.2		2013-02-18	2013-03-08	18	0.210239	2.87604	3.51153	4.6095		6.89385e-05	8.41711e-05	0.000110489
E2-13	Diet	C-Ag	3	8	2	Bi	Bile	121	1.0134	121	1.1092	0.0958	0		29.56	15.1		2013-02-18	2013-03-08	18	0	0				0
E2-13	Diet	C-Ag	3	9	3	Bi	Bile	130	1.0124	130	1.0844	0.072	0.5		21.36	13.7		2013-02-18	2013-03-08	18	0.525597	7.29996				0.000174979
E2-13	Diet	C-Ag	3	10	4	Bi	Bile	139	1.0004	139	1.0642	0.0638	0		23.08	13.9		2013-02-18	2013-03-08	18	0	0				0
E2-13	Diet	C-Ag	3	11	5	Bi	Bile	148	1.0053	148	1.0787	0.0734	0		23.51	14.7		2013-02-18	2013-03-08	18	0	0				0
E2-13	Diet	C-Ag	3	12	6	Bi	Bile	157	1.0042	157	1.0428	0.0386	0.4		16.18	12.5		2013-02-18	2013-03-08	18	0.420478	10.8932				0.000261109
E2-13	Diet	Cont.	3	13	1	Bi	Bile	4	1.0352	4	1.0937	0.0585	5.4	0	23.87	14.3		2013-02-18	2013-03-08	18	5.67645	97.0333	22.3937	42.223
E2-13	Diet	Cont.	3	14	2	Bi	Bile	13	1.0391	13	1.1364	0.0973	0	0	22.62	13.9		2013-02-18	2013-03-08	18	0	0
E2-13	Diet	Cont.	3	15	3	Bi	Bile	27	1.0014	27	1.0744	0.073	0	0	30.53	15		2013-02-18	2013-03-08	18	0	0
E2-13	Diet	Cont.	3	16	4	Bi	Bile	31	1.0047	31	1.0962	0.0915	1.3	0	20.81	13.7		2013-02-18	2013-03-08	18	1.36655	14.935
E2-13	Diet	Cont.	3	17	5	Bi	Bile	40	1.013	40	1.0655	0.0525	0	0	13.89	12		2013-02-18	2013-03-08	18	0	0
E2-13	Diet	Cont.	3	18	6	Bi	Bile	49	1.0023	49				0	14.68	12.3
E2-13	Diet	S-Ag	3	19	1	Bi	Bile	58	1.0146	58	1.09	0.0754	1.4		16.9	12.5		2013-02-18	2013-03-08	18	1.47167	19.5182	10.1441	10.1976		0.000854337	0.000370017	0.000438464
E2-13	Diet	S-Ag	3	20	2	Bi	Bile	67	1.0124	67	1.1365	0.1241	0.8		28.35	14.5		2013-02-18	2013-03-08	18	0.840955	6.77643				0.000296613
E2-13	Diet	S-Ag	3	21	3	Bi	Bile	76	1.0118	76	1.1019	0.0901	0		27.09	14.3		2013-02-18	2013-03-08	18	0	0				0
E2-13	Diet	S-Ag	3	22	4	Bi	Bile	85	1.033	85	1.0835	0.0505	0.1		20.81	13.8		2013-02-18	2013-03-08	18	0.105119	2.08157				9.11132e-05
E2-13	Diet	S-Ag	3	23	5	Bi	Bile	94	1.012	94	1.1155	0.1035	2.2		25.9	14.1		2013-02-18	2013-03-08	18	2.31263	22.3442				0.000978036
E2-13	Diet	S-Ag	3	24	6	Bi	Bile	103	1.0267	103					14.35	11.8										0
E2-13	Diet	Ag+	3	25	1	Br	Brain	169	1.0339	169	1.1589	0.125	0		30.08	15.4		2013-02-18			0	0	7.80655	12.3318
E2-13	Diet	Ag+	3	26	2	Br	Brain	178	1.0358	178	1.168	0.1322	3.6		25.12	14.9		2013-02-18			3.6	27.2315
E2-13	Diet	Ag+	3	27	3	Br	Brain	187	1.0005	187	1.0983	0.0978	0		14.65	12.5		2013-02-18			0	0
E2-13	Diet	Ag+	3	28	4	Br	Brain	196	1.0038	196	1.1282	0.1244	0		28.79	15.1		2013-02-18			0	0
E2-13	Diet	Ag+	3	29	5	Br	Brain	205	1.0368	205	1.1337	0.0969	1.9		14.01	12.6		2013-02-18			1.9	19.6078
E2-13	Diet	Ag+	3	30	6	Br	Brain	214	1.0112	214	1.0852	0.074	0		15.66	12.4		2013-02-18			0	0
E2-13	Diet	C-Ag	3	31	1	Br	Brain	115	1.0017	115	1.0849	0.0832	0		24.31	14.2		2013-02-18			0	0	0	0
E2-13	Diet	C-Ag	3	32	2	Br	Brain	124	1.0058	124	1.0953	0.0895	0		29.56	15.1		2013-02-18			0	0
E2-13	Diet	C-Ag	3	33	3	Br	Brain	133	1.034	133	1.1142	0.0802	0		21.36	13.7		2013-02-18			0	0
E2-13	Diet	C-Ag	3	34	4	Br	Brain	142	1.0131	142	1.1111	0.098	0		23.08	13.9		2013-02-18			0	0
E2-13	Diet	C-Ag	3	35	5	Br	Brain	151	1.011	151	1.0868	0.0758	0		23.51	14.7		2013-02-18			0	0
E2-13	Diet	C-Ag	3	36	6	Br	Brain	160	1.0154	160	1.1117	0.0963	0		16.18	12.5		2013-02-18			0	0
E2-13	Diet	Cont.	3	37	1	Br	Brain	7	1.0113	7	1.0905	0.0792	0		23.87	14.3		2013-02-18			0	0	0.915751	2.24312
E2-13	Diet	Cont.	3	38	2	Br	Brain	16	1	16	1.1021	0.1021	0		22.62	13.9		2013-02-18			0	0
E2-13	Diet	Cont.	3	39	3	Br	Brain	25	0.9989	25	1.1263	0.1274	0.7		30.53	15		2013-02-18			0.7	5.49451
E2-13	Diet	Cont.	3	40	4	Br	Brain	34	1.0004	34	1.088	0.0876	0		20.81	13.7		2013-02-18			0	0
E2-13	Diet	Cont.	3	41	5	Br	Brain	43	1.0127	43	1.0918	0.0791	0		13.89	12		2013-02-18			0	0
E2-13	Diet	Cont.	3	42	6	Br	Brain	52	1.0033	52	1.0869	0.0836	0		14.68	12.3		2013-02-18			0	0
E2-13	Diet	S-Ag	3	43	1	Br	Brain	61	1.0398	61	1.1249	0.0851	0.5		16.9	12.5		2013-02-18			0.5	5.87544	7.85984	10.4383
E2-13	Diet	S-Ag	3	44	2	Br	Brain	70	1.0046	70	1.1233	0.1187	2		28.35	14.5		2013-02-18			2	16.8492
E2-13	Diet	S-Ag	3	45	3	Br	Brain	79	1.0173	79	1.1344	0.1171	0		27.09	14.3		2013-02-18			0	0
E2-13	Diet	S-Ag	3	46	4	Br	Brain	88	1.0149	88	1.1208	0.1059	0		20.81	13.8		2013-02-18			0	0
E2-13	Diet	S-Ag	3	47	5	Br	Brain	97	1.0478	97	1.1583	0.1105	2.7		25.9	14.1		2013-02-18			2.7	24.4344
E2-13	Diet	S-Ag	3	48	6	Br	Brain	106	1.0486	106	1.1414	0.0928	0		14.35	11.8		2013-02-18			0	0
E2-13	Diet	Ag+	3	49	1	GC	Gut content	883	1.0539	883	1.1312	0.0773	1349.4		30.08	15.4		2013-02-18	2013-02-22	4	1364.45	17651.4	27614.9	6004.38	22140.2
E2-13	Diet	Ag+	3	50	2	GC	Gut content	884	1.0594	884	1.0869	0.0275	952.8		25.12	14.9		2013-02-18	2013-02-22	4	963.43	35033.8
E2-13	Diet	Ag+	3	51	3	GC	Gut content	885	1.0603	885	1.177	0.1167	3658.6		14.65	12.5		2013-02-18	2013-02-22	4	3699.42	31700.2
E2-13	Diet	Ag+	3	52	4	GC	Gut content	886	1.0498	886	1.2336	0.1838	4761.9		28.79	15.1		2013-02-18	2013-02-22	4	4815.03	26197.1
E2-13	Diet	Ag+	3	53	5	GC	Gut content	887	1.0576	887	1.0723	0.0147	372.9		14.01	12.6		2013-02-18	2013-02-22	4	377.06	25650.4
E2-13	Diet	Ag+	3	54	6	GC	Gut content	888	1.0456	888	1.0661	0.0205	597.2		15.66	12.4		2013-02-18	2013-02-22	4	603.863	29456.7
E2-13	Diet	C-Ag	3	55	1	GC	Gut content	877	1.0588	877	1.1344	0.0756	2813.8		24.31	14.2		2013-02-18	2013-02-22	4	2845.19	37634.8	38162.3	18037.6	15377
E2-13	Diet	C-Ag	3	56	2	GC	Gut content	878	1.0397	878	1.1637	0.124	7428.8		29.56	15.1		2013-02-18	2013-02-22	4	7511.68	60578.1
E2-13	Diet	C-Ag	3	57	3	GC	Gut content	879	1.0519	879	1.154	0.1021	5643.2		21.36	13.7		2013-02-18	2013-02-22	4	5706.16	55887.9
E2-13	Diet	C-Ag	3	58	4	GC	Gut content	880	1.0593	880	1.1029	0.0436	1486.6		23.08	13.9		2013-02-18	2013-02-22	4	1503.19	34476.7
E2-13	Diet	C-Ag	3	59	5	GC	Gut content	881	1.0583	881	1.0738	0.0155	176.5		23.51	14.7		2013-02-18	2013-02-22	4	178.469	11514.1
E2-13	Diet	C-Ag	3	60	6	GC	Gut content	882	1.0588	882	1.0849	0.0261	745.5		16.18	12.5		2013-02-18	2013-02-22	4	753.817	28881.9
E2-13	Diet	Cont.	3	61	1	GC	Gut content	865	1.0507	865	1.1472	0.0965	21.7		23.87	14.3		2013-02-18	2013-02-22	4	21.9421	227.379	186.344	111.884
E2-13	Diet	Cont.	3	62	2	GC	Gut content	866	1.0486	866	1.2359	0.1873	18.7		22.62	13.9		2013-02-18	2013-02-22	4	18.9086	100.954
E2-13	Diet	Cont.	3	63	3	GC	Gut content	867	1.0556	867	1.3093	0.2537	17.9		30.53	15		2013-02-18	2013-02-22	4	18.0997	71.3429
E2-13	Diet	Cont.	3	64	4	GC	Gut content	868	1.0443	868	1.1388	0.0945	17.5		20.81	13.7		2013-02-18	2013-02-22	4	17.6952	187.251
E2-13	Diet	Cont.	3	65	5	GC	Gut content	869	1.0575	869	1.1126	0.0551	20.9		13.89	12		2013-02-18	2013-02-22	4	21.1332	383.542
E2-13	Diet	Cont.	3	66	6	GC	Gut content	870	1.0545	870	1.2107	0.1562	22.8		14.68	12.3		2013-02-18	2013-02-22	4	23.0544	147.595
E2-13	Diet	S-Ag	3	67	1	GC	Gut content	871	1.0493	871	1.0673	0.018	291.4		16.9	12.5		2013-02-18	2013-02-22	4	294.651	16369.5	24664	8204.06	6225.5
E2-13	Diet	S-Ag	3	68	2	GC	Gut content	872	1.0539	872	1.0992	0.0453	1547.4		28.35	14.5		2013-02-18	2013-02-22	4	1564.66	34540
E2-13	Diet	S-Ag	3	69	3	GC	Gut content	873	1.0567	873	1.1439	0.0872	1745.8		27.09	14.3		2013-02-18	2013-02-22	4	1765.28	20244
E2-13	Diet	S-Ag	3	70	4	GC	Gut content	874	1.041	874	1.0758	0.0348	1178.4		20.81	13.8		2013-02-18	2013-02-22	4	1191.55	34239.9
E2-13	Diet	S-Ag	3	71	5	GC	Gut content	875	1.061	875	1.2099	0.1489	2508.8		25.9	14.1		2013-02-18	2013-02-22	4	2536.79	17036.9
E2-13	Diet	S-Ag	3	72	6	GC	Gut content	876	1.0556	876	1.0961	0.0405	1023.5		14.35	11.8		2013-02-18	2013-02-22	4	1034.92	25553.5
E2-13	Diet	Ag+	3	73	1	Gi	Gill	163	1.0018	163	1.5683	0.5665	2.3		30.08	15.4		2013-02-18	2013-02-22	4	2.32566	4.10531	191.492	287.778		0.000159572	0.00744322	0.0111858
E2-13	Diet	Ag+	3	74	2	Gi	Gill	172	1.0347	172	1.5658	0.5311	0.5		25.12	14.9		2013-02-18	2013-02-22	4	0.505578	0.951946				3.70018e-05
E2-13	Diet	Ag+	3	75	3	Gi	Gill	181	1.0278	181	1.3595	0.3317	5.1		14.65	12.5		2013-02-18	2013-02-22	4	5.1569	15.5469				0.000604302
E2-13	Diet	Ag+	3	76	4	Gi	Gill	190	1.0104	190	1.4766	0.4662	272.1		28.79	15.1		2013-02-18	2013-02-22	4	275.136	590.167				0.0229396
E2-13	Diet	Ag+	3	77	5	Gi	Gill	199	1.0057	199	1.3115	0.3058	161.6		14.01	12.6		2013-02-18	2013-02-22	4	163.403	534.346				0.0207698
E2-13	Diet	Ag+	3	78	6	Gi	Gill	208	1.0101	208	1.353	0.3429	1.3		15.66	12.4		2013-02-18	2013-02-22	4	1.3145	3.83349				0.000149006
E2-13	Diet	C-Ag	3	79	1	Gi	Gill	109	1.036	109	1.5124	0.4764	10.3		24.31	14.2		2013-02-18	2013-02-22	4	10.4149	21.8617	44.6477	92.1966		0.000524023	0.0010702	0.00220994
E2-13	Diet	C-Ag	3	80	2	Gi	Gill	118	1.0141	118	1.4431	0.429	0.5		29.56	15.1		2013-02-18	2013-02-22	4	0.505578	1.1785				2.82486e-05
E2-13	Diet	C-Ag	3	81	3	Gi	Gill	127	1.0031	127	1.3925	0.3894	2.2		21.36	13.7		2013-02-18	2013-02-22	4	2.22454	5.71275				0.000136934
E2-13	Diet	C-Ag	3	82	4	Gi	Gill	136	1.0033	136	1.489	0.4857	2		23.08	13.9		2013-02-18	2013-02-22	4	2.02231	4.16371				9.98036e-05
E2-13	Diet	C-Ag	3	83	5	Gi	Gill	145	1.0016	145	1.4791	0.4775	1.3		23.51	14.7		2013-02-18	2013-02-22	4	1.3145	2.75289				6.59864e-05
E2-13	Diet	C-Ag	3	84	6	Gi	Gill	154	1.005	154	1.3294	0.3244	74.5		16.18	12.5		2013-02-18	2013-02-22	4	75.3312	232.217				0.00556621
E2-13	Diet	Cont.	3	85	1	Gi	Gill	1	1.0031	1	1.4238	0.4207	0	0	23.87	14.3		2013-02-18	2013-02-22	4	0	0	1.89092	3.18549
E2-13	Diet	Cont.	3	86	2	Gi	Gill	10	0.9995	10	1.4105	0.411	0.3	0	22.62	13.9		2013-02-18	2013-02-22	4	0.303347	0.73807
E2-13	Diet	Cont.	3	87	3	Gi	Gill	19	1.0028	19	1.4592	0.4564	3.7	0	30.53	15		2013-02-18	2013-02-22	4	3.74128	8.19737
E2-13	Diet	Cont.	3	88	4	Gi	Gill	28	1.0086	28	1.3968	0.3882	0.8	0	20.81	13.7		2013-02-18	2013-02-22	4	0.808925	2.08378
E2-13	Diet	Cont.	3	89	5	Gi	Gill	37	1.0028	37	1.3364	0.3336	0	0	13.89	12		2013-02-18	2013-02-22	4	0	0
E2-13	Diet	Cont.	3	90	6	Gi	Gill	46	1.018	46	1.3279	0.3099	0.1	0	14.68	12.3		2013-02-18	2013-02-22	4	0.101116	0.326285
E2-13	Diet	S-Ag	3	91	1	Gi	Gill	55	1.0021	55	1.2572	0.2551	4.7		16.9	12.5		2013-02-18	2013-02-22	4	4.75244	18.6297	44.7932	45.7429		0.000815447	0.00196066	0.00200223
E2-13	Diet	S-Ag	3	92	2	Gi	Gill	64	1.0098	64	1.4752	0.4654	2.9		28.35	14.5		2013-02-18	2013-02-22	4	2.93235	6.30072				0.000275791
E2-13	Diet	S-Ag	3	93	3	Gi	Gill	73	1.0019	73	1.4259	0.424	41		27.09	14.3		2013-02-18	2013-02-22	4	41.4574	97.7769				0.00427983
E2-13	Diet	S-Ag	3	94	4	Gi	Gill	82	1.0021	82	1.4217	0.4196	2.9		20.81	13.8		2013-02-18	2013-02-22	4	2.93235	6.98845				0.000305894
E2-13	Diet	S-Ag	3	95	5	Gi	Gill	91	1.0183	91	1.5315	0.5132	54.4		25.9	14.1		2013-02-18	2013-02-22	4	55.0069	107.184				0.00469159
E2-13	Diet	S-Ag	3	96	6	Gi	Gill	100	1.0008	100	1.3275	0.3267	10.3		14.35	11.8		2013-02-18	2013-02-22	4	10.4149	31.8791				0.00139539
E2-13	Diet	Ag+	3	1	1	Ha	Heart	167	1.0019	167	1.0529	0.051	3.3		30.08	15.4		2013-02-18	2013-03-23	33	3.61631	70.9081	27.7406	43.6756
E2-13	Diet	Ag+	3	2	2	Ha	Heart	176	1.0348	176	1.0786	0.0438	0		25.12	14.9		2013-02-18	2013-03-23	33	0	0
E2-13	Diet	Ag+	3	3	3	Ha	Heart	185	1.009	185	1.0285	0.0195	1.7		14.65	12.5		2013-02-18	2013-03-23	33	1.86295	95.5358
E2-13	Diet	Ag+	3	4	4	Ha	Heart	194	1.0102	194	1.0607	0.0505	0		28.79	15.1		2013-02-18	2013-03-23	33	0	0
E2-13	Diet	Ag+	3	5	5	Ha	Heart	203	1.0108	203	1.0359	0.0251	0		14.01	12.6		2013-02-18	2013-03-23	33	0	0
E2-13	Diet	Ag+	3	6	6	Ha	Heart	212	1.0025	212	1.0325	0.03	0		15.66	12.4		2013-02-18	2013-03-23	33	0	0
E2-13	Diet	C-Ag	3	7	1	Ha	Heart	113	1.005	113	1.0537	0.0487	0		24.31	14.2		2013-02-18	2013-03-23	33	0	0	8.49697	13.3882
E2-13	Diet	C-Ag	3	8	2	Ha	Heart	122	1.006	122	1.0573	0.0513	0		29.56	15.1		2013-02-18	2013-03-23	33	0	0
E2-13	Diet	C-Ag	3	9	3	Ha	Heart	131	1.019	131	1.0574	0.0384	0		21.36	13.7		2013-02-18	2013-03-23	33	0	0
E2-13	Diet	C-Ag	3	10	4	Ha	Heart	140	1.01	140	1.0548	0.0448	1.2		23.08	13.9		2013-02-18	2013-03-23	33	1.31502	29.3532
E2-13	Diet	C-Ag	3	11	5	Ha	Heart	149	1.0167	149	1.0623	0.0456	0.9		23.51	14.7		2013-02-18	2013-03-23	33	0.986267	21.6287
E2-13	Diet	C-Ag	3	12	6	Ha	Heart	158	1.0356	158	1.079	0.0434	0		16.18	12.5		2013-02-18	2013-03-23	33	0	0
E2-13	Diet	Cont.	3	13	1	Ha	Heart	5	1.0241	5	1.0643	0.0402	1.4		23.87	14.3		2013-02-18	2013-03-23	33	1.53419	38.164	6.36067	15.5804
E2-13	Diet	Cont.	3	14	2	Ha	Heart	14	1.0348	14	1.0728	0.038	0		22.62	13.9		2013-02-18	2013-03-23	33	0	0
E2-13	Diet	Cont.	3	15	3	Ha	Heart	23	1.0066	23	1.0561	0.0495	0		30.53	15		2013-02-18	2013-03-23	33	0	0
E2-13	Diet	Cont.	3	16	4	Ha	Heart	32	1.0049	32	1.0391	0.0342	0		20.81	13.7		2013-02-18	2013-03-23	33	0	0
E2-13	Diet	Cont.	3	17	5	Ha	Heart	41	1.035	41	1.0634	0.0284	0		13.89	12		2013-02-18	2013-03-23	33	0	0
E2-13	Diet	Cont.	3	18	6	Ha	Heart	50	1.0104	50	1.042	0.0316	0		14.68	12.3		2013-02-18	2013-03-23	33	0	0
E2-13	Diet	S-Ag	3	19	1	Ha	Heart	59	1.0148	59	1.0454	0.0306	0		16.9	12.5		2013-02-18	2013-03-23	33	0	0	5.1208	12.5434
E2-13	Diet	S-Ag	3	20	2	Ha	Heart	68	1.0064	68	1.0481	0.0417	0		28.35	14.5		2013-02-18	2013-03-23	33	0	0
E2-13	Diet	S-Ag	3	21	3	Ha	Heart	77	1.0372	77	1.08	0.0428	1.2		27.09	14.3		2013-02-18	2013-03-23	33	1.31502	30.7248
E2-13	Diet	S-Ag	3	22	4	Ha	Heart	86	1.0011	86	1.0363	0.0352	0		20.81	13.8		2013-02-18	2013-03-23	33	0	0
E2-13	Diet	S-Ag	3	23	5	Ha	Heart	95	1.0173	95	1.0553	0.038	0		25.9	14.1		2013-02-18	2013-03-23	33	0	0
E2-13	Diet	S-Ag	3	24	6	Ha	Heart	102	1.0103	102	1.0363	0.026	0		14.35	11.8		2013-02-18	2013-03-23	33	0	0
E2-13	Diet	Ag+	3	25	1	Int.	Intestines	168	1.0161	168	2.477	1.4609	205.7		30.08	15.4		2013-02-18	2013-03-08	18	216.231	148.012	387.153	269.118		0.00575317	0.0150485	0.0104605
E2-13	Diet	Ag+	3	26	2	Int.	Intestines	177	1.0251	177	2.3586	1.3335	719.2		25.12	14.9		2013-02-18	2013-03-08	18	756.019	566.943				0.0220369
E2-13	Diet	Ag+	3	27	3	Int.	Intestines	186	1.0024	186	1.6916	0.6892	497.4		14.65	12.5		2013-02-18	2013-03-08	18	522.864	758.653				0.0294886
E2-13	Diet	Ag+	3	28	4	Int.	Intestines	195	1.012	195	2.6773	1.6653	66.3		28.79	15.1		2013-02-18	2013-03-08	18	69.6942	41.8508				0.00162673
E2-13	Diet	Ag+	3	29	5	Int.	Intestines	204	1.0138	204	1.739	0.7252	337.9		14.01	12.6		2013-02-18	2013-03-08	18	355.198	489.794				0.0190381
E2-13	Diet	Ag+	3	30	6	Int.	Intestines	213	1.049	213	1.7866	0.7376	222.9		15.66	12.4		2013-02-18	2013-03-08	18	234.311	317.667				0.0123476
E2-13	Diet	C-Ag	3	31	1	Int.	Intestines	114	1.0054	114	2.4941	1.4887	1414.5		24.31	14.2		2013-02-18	2013-03-08	18	1486.91	998.8	787.322	591.833		0.0239411	0.018872	0.0141862
E2-13	Diet	C-Ag	3	32	2	Int.	Intestines	123	1.0051	123	2.4001	1.395	2431.7		29.56	15.1		2013-02-18	2013-03-08	18	2556.19	1832.39				0.0439223
E2-13	Diet	C-Ag	3	33	3	Int.	Intestines	132	1.0154	132	1.2452	0.2298	56.1		21.36	13.7		2013-02-18	2013-03-08	18	58.972	256.623				0.00615123
E2-13	Diet	C-Ag	3	34	4	Int.	Intestines	141	1.0191	141	2.4089	1.3898	958.3		23.08	13.9		2013-02-18	2013-03-08	18	1007.36	724.823				0.0173739
E2-13	Diet	C-Ag	3	35	5	Int.	Intestines	150	1.0042	150	2.1673	1.1631	246		23.51	14.7		2013-02-18	2013-03-08	18	258.594	222.331				0.00532926
E2-13	Diet	C-Ag	3	36	6	Int.	Intestines	159	1.0162	159	1.6941	0.6779	444.3		16.18	12.5		2013-02-18	2013-03-08	18	467.045	688.959				0.0165143
E2-13	Diet	Cont.	3	37	1	Int.	Intestines	6	1.0017	6	1.8462	0.8445	4.2		23.87	14.3		2013-02-18	2013-03-08	18	4.41501	5.22796	5.95055	4.12671
E2-13	Diet	Cont.	3	38	2	Int.	Intestines	15	1.0324	15	1.9243	0.8919	9.3		22.62	13.9		2013-02-18	2013-03-08	18	9.7761	10.961
E2-13	Diet	Cont.	3	39	3	Int.	Intestines	24	1	24	1.9848	0.9848	3.5		30.53	15		2013-02-18	2013-03-08	18	3.67918	3.73597
E2-13	Diet	Cont.	3	40	4	Int.	Intestines	33	1.0194	33	1.9224	0.903	4.7		20.81	13.7		2013-02-18	2013-03-08	18	4.94061	5.47133
E2-13	Diet	Cont.	3	41	5	Int.	Intestines	42	1.035	42	1.8713	0.8363	8.2		13.89	12		2013-02-18	2013-03-08	18	8.61979	10.3071
E2-13	Diet	Cont.	3	42	6	Int.	Intestines	51	1.0375	51	1.8644	0.8269	0		14.68	12.3		2013-02-18	2013-03-08	18	0	0
E2-13	Diet	S-Ag	3	43	1	Int.	Intestines	60	1.0183	60	1.8678	0.8495	316		16.9	12.5		2013-02-18	2013-03-08	18	332.177	391.027	666.67	313.254		0.0171158	0.029181	0.0137115
E2-13	Diet	S-Ag	3	44	2	Int.	Intestines	69	1.0127	69	2.6671	1.6544	1109.6		28.35	14.5		2013-02-18	2013-03-08	18	1166.4	705.032				0.0308602
E2-13	Diet	S-Ag	3	45	3	Int.	Intestines	78	1.0503	78	2.4196	1.3693	599.1		27.09	14.3		2013-02-18	2013-03-08	18	629.77	459.921				0.0201314
E2-13	Diet	S-Ag	3	46	4	Int.	Intestines	87	1.0167	87	2.2555	1.2388	1359.7		20.81	13.8		2013-02-18	2013-03-08	18	1429.31	1153.78				0.0505027
E2-13	Diet	S-Ag	3	47	5	Int.	Intestines	96	1.0345	96	2.6124	1.5779	582.4		25.9	14.1		2013-02-18	2013-03-08	18	612.215	387.994				0.016983
E2-13	Diet	S-Ag	3	48	6	Int.	Intestines	105	1.0009	105	1.6926	0.6917	593.7		14.35	11.8		2013-02-18	2013-03-08	18	624.094	902.261				0.0394932
E2-13	Diet	Ag+	3	49	1	Ki	Kidney	165	1.0111	165	1.2488	0.2377	0.5		30.08	15.4		2013-02-18	2013-02-21	3	0.504178	2.12107	16.638	19.1609		8.24452e-05	0.000646712	0.000744777
E2-13	Diet	Ag+	3	50	2	Ki	Kidney	174	1.0348	174	1.1934	0.1586	4.9		25.12	14.9		2013-02-18	2013-02-21	3	4.94094	31.1535				0.00121093
E2-13	Diet	Ag+	3	51	3	Ki	Kidney	183	1.0027	183	1.1089	0.1062	2.2		14.65	12.5		2013-02-18	2013-02-21	3	2.21838	20.8887				0.000811938
E2-13	Diet	Ag+	3	52	4	Ki	Kidney	192	1.0111	192	1.254	0.2429	11		28.79	15.1		2013-02-18	2013-02-21	3	11.0919	45.6645				0.00177497
E2-13	Diet	Ag+	3	53	5	Ki	Kidney	201	1.0359	201	1.1371	0.1012	0		14.01	12.6		2013-02-18	2013-02-21	3	0	0				0
E2-13	Diet	Ag+	3	54	6	Ki	Kidney	210	1.0054	210	1.1135	0.1081	0		15.66	12.4		2013-02-18	2013-02-21	3	0	0				0
E2-13	Diet	C-Ag	3	55	1	Ki	Kidney	111	1.011	111	1.1876	0.1766	0		24.31	14.2		2013-02-18	2013-02-21	3	0	0	2.68026	5.05687		0	0.000104181	0.000196559
E2-13	Diet	C-Ag	3	56	2	Ki	Kidney	120	1.0133	120	1.181	0.1677	0		29.56	15.1		2013-02-18	2013-02-21	3	0	0				0
E2-13	Diet	C-Ag	3	57	3	Ki	Kidney	129	1.0104	129	1.1486	0.1382	0		21.36	13.7		2013-02-18	2013-02-21	3	0	0				0
E2-13	Diet	C-Ag	3	58	4	Ki	Kidney	138	1.0196	138	1.2356	0.216	2.7		23.08	13.9		2013-02-18	2013-02-21	3	2.72256	12.6044				0.000489931
E2-13	Diet	C-Ag	3	59	5	Ki	Kidney	147	1.051	147	1.2373	0.1863	0		23.51	14.7		2013-02-18	2013-02-21	3	0	0				0
E2-13	Diet	C-Ag	3	60	6	Ki	Kidney	156	1.013	156	1.129	0.116	0.4		16.18	12.5		2013-02-18	2013-02-21	3	0.403342	3.47709				0.000135153
E2-13	Diet	Cont.	3	61	1	Ki	Kidney	3	1.0017	3	1.2037	0.202	0	0	23.87	14.3		2013-02-18	2013-02-21	3	0	0	5.57013	8.6319
E2-13	Diet	Cont.	3	62	2	Ki	Kidney	12	1.0007	12	1.1454	0.1447	0	0	22.62	13.9		2013-02-18	2013-02-21	3	0	0
E2-13	Diet	Cont.	3	63	3	Ki	Kidney	21	1.019	21	1.1777	0.1587	0	0	30.53	15		2013-02-18	2013-02-21	3	0	0
E2-13	Diet	Cont.	3	64	4	Ki	Kidney	30	1.0016	30	1.1248	0.1232	2	0	20.81	13.7		2013-02-18	2013-02-21	3	2.01671	16.3694
E2-13	Diet	Cont.	3	65	5	Ki	Kidney	39	1.0395	39	1.1696	0.1301	2.2	0	13.89	12		2013-02-18	2013-02-21	3	2.21838	17.0514
E2-13	Diet	Cont.	3	66	6	Ki	Kidney	48	1.0058	48	1.1224	0.1166	0	0	14.68	12.3		2013-02-18	2013-02-21	3	0	0
E2-13	Diet	S-Ag	3	67	1	Ki	Kidney	57	1.0512	57	1.0776	0.0264	0		16.9	12.5		2013-02-18	2013-02-21	3	0	0	5.00752	4.29183		0	0.000219186	0.000187859
E2-13	Diet	S-Ag	3	68	2	Ki	Kidney	66	1.0028	66	1.1724	0.1696	0.7		28.35	14.5		2013-02-18	2013-02-21	3	0.705849	4.16185				0.00018217
E2-13	Diet	S-Ag	3	69	3	Ki	Kidney	75	1.0117	75	1.1824	0.1707	0.4		27.09	14.3		2013-02-18	2013-02-21	3	0.403342	2.36287				0.000103426
E2-13	Diet	S-Ag	3	70	4	Ki	Kidney	84	1.0122	84	1.141	0.1288	1.2		20.81	13.8		2013-02-18	2013-02-21	3	1.21003	9.39462				0.000411215
E2-13	Diet	S-Ag	3	71	5	Ki	Kidney	93	1.0079	93	1.2728	0.2649	2.9		25.9	14.1		2013-02-18	2013-02-21	3	2.92423	11.039				0.000483192
E2-13	Diet	S-Ag	3	72	6	Ki	Kidney	104	1.0485	104	1.1465	0.098	0.3		14.35	11.8		2013-02-18	2013-02-21	3	0.302507	3.0868				0.000135114
E2-13	Diet	Ag+	3	73	1	Li	Liver	164	1.0373	164	1.4297	0.3924	6.6		30.08	15.4		2013-02-18	2013-03-06	16	6.8995	17.5828	16.7288	13.2079		0.000683438	0.000650243	0.000513387
E2-13	Diet	Ag+	3	74	2	Li	Liver	173	1.0136	173	1.3356	0.322	6.8		25.12	14.9		2013-02-18	2013-03-06	16	7.10857	22.0763				0.000858099
E2-13	Diet	Ag+	3	75	3	Li	Liver	182	1.0205	182	1.2135	0.193	7.4		14.65	12.5		2013-02-18	2013-03-06	16	7.7358	40.0819				0.00155797
E2-13	Diet	Ag+	3	76	4	Li	Liver	191	1.0092	191	1.3258	0.3166	1.6		28.79	15.1		2013-02-18	2013-03-06	16	1.67261	5.28303				0.000205349
E2-13	Diet	Ag+	3	77	5	Li	Liver	200	1.0024	200	1.1685	0.1661	1.4		14.01	12.6		2013-02-18	2013-03-06	16	1.46353	8.81114				0.000342486
E2-13	Diet	Ag+	3	78	6	Li	Liver	209	1.0365	209	1.1964	0.1599	1		15.66	12.4		2013-02-18	2013-03-06	16	1.04538	6.5377				0.000254118
E2-13	Diet	C-Ag	3	79	1	Li	Liver	110	1.0137	110	1.2793	0.2656	1.1		24.31	14.2		2013-02-18	2013-03-06	16	1.14992	4.3295	2.64249	3.02521		0.000103778	6.33402e-05	7.25139e-05
E2-13	Diet	C-Ag	3	80	2	Li	Liver	119	1.0132	119	1.3931	0.3799	2.5		29.56	15.1		2013-02-18	2013-03-06	16	2.61345	6.8793				0.000164896
E2-13	Diet	C-Ag	3	81	3	Li	Liver	128	1.0369	128	1.2401	0.2032			21.36	13.7		2013-02-18	2013-03-06	16	0	0				0
E2-13	Diet	C-Ag	3	82	4	Li	Liver	137	1.0113	137	1.3076	0.2963	0		23.08	13.9		2013-02-18	2013-03-06	16	0	0				0
E2-13	Diet	C-Ag	3	83	5	Li	Liver	146	1.0178	146	1.3464	0.3286	0		23.51	14.7		2013-02-18	2013-03-06	16	0	0				0
E2-13	Diet	C-Ag	3	84	6	Li	Liver	155	1.0024	155	1.2049	0.2025	0.9		16.18	12.5		2013-02-18	2013-03-06	16	0.940841	4.64613				0.000111367
E2-13	Diet	Cont.	3	85	1	Li	Liver	2	1.0023	2	1.3323	0.33	1.6		23.87	14.3		2013-02-18	2013-03-06	16	1.67261	5.0685	3.63234	2.98425
E2-13	Diet	Cont.	3	86	2	Li	Liver	11	1.0047	11	1.3273	0.3226	1.2		22.62	13.9		2013-02-18	2013-03-06	16	1.25445	3.88858
E2-13	Diet	Cont.	3	87	3	Li	Liver	20	0.9995	20	1.393	0.3935	0		30.53	15		2013-02-18	2013-03-06	16	0	0
E2-13	Diet	Cont.	3	88	4	Li	Liver	29	1.0138	29	1.2709	0.2571	1.7		20.81	13.7		2013-02-18	2013-03-06	16	1.77714	6.91227
E2-13	Diet	Cont.	3	89	5	Li	Liver	38	1.0044	38	1.1632	0.1588	0.9		13.89	12		2013-02-18	2013-03-06	16	0.940841	5.92469
E2-13	Diet	Cont.	3	90	6	Li	Liver	47	1.017	47	1.1719	0.1549	0		14.68	12.3		2013-02-18	2013-03-06	16	0	0
E2-13	Diet	S-Ag	3	91	1	Li	Liver	56	1.0495	56	1.1955	0.146	3.2		16.9	12.5		2013-02-18	2013-03-06	16	3.34521	22.9124	11.9148	6.7845		0.00100291	0.000521527	0.000296967
E2-13	Diet	S-Ag	3	92	2	Li	Liver	65	1.0017	65	1.294	0.2923	2.9		28.35	14.5		2013-02-18	2013-03-06	16	3.0316	10.3715				0.000453976
E2-13	Diet	S-Ag	3	93	3	Li	Liver	74	1.0127	74	1.2961	0.2834	3.5		27.09	14.3		2013-02-18	2013-03-06	16	3.65883	12.9105				0.000565108
E2-13	Diet	S-Ag	3	94	4	Li	Liver	83	1.0197	83	1.3623	0.3426	1.9		20.81	13.8		2013-02-18	2013-03-06	16	1.98622	5.79749				0.000253764
E2-13	Diet	S-Ag	3	95	5	Li	Liver	92	1.0341	92	1.3974	0.3633	1.5		25.9	14.1		2013-02-18	2013-03-06	16	1.56807	4.31618				0.000188925
E2-13	Diet	S-Ag	3	96	6	Li	Liver	101	1.0006	101	1.2003	0.1997	2.9		14.35	11.8		2013-02-18	2013-03-06	16	3.0316	15.1808				0.000664482
E2-13	Diet	Ag+	3	1	1	Mi	Spleen	171	1.0047	171	1.0328	0.0281	0		30.08	15.4		2013-02-18	2013-03-22	32	0	0	2.05803	5.04114		0
E2-13	Diet	Ag+	3	2	2	Mi	Spleen	180	1.0041	180	1.0371	0.033	0		25.12	14.9		2013-02-18	2013-03-22	32	0	0				0
E2-13	Diet	Ag+	3	3	3	Mi	Spleen	189	1.0025	189	1.0148	0.0123	0		14.65	12.5		2013-02-18	2013-03-22	32	0	0				0
E2-13	Diet	Ag+	3	4	4	Mi	Spleen	198	1.012	198	1.0352	0.0232	0		28.79	15.1		2013-02-18	2013-03-22	32	0	0				0
E2-13	Diet	Ag+	3	5	5	Mi	Spleen	207	1.0022	207	1.0199	0.0177	0.2		14.01	12.6		2013-02-18	2013-03-22	32	0.218563	12.3482				0.000479971
E2-13	Diet	Ag+	3	6	6	Mi	Spleen	216	1.0387	216	1.0564	0.0177	0		15.66	12.4		2013-02-18	2013-03-22	32	0	0				0
E2-13	Diet	C-Ag	3	7	1	Mi	Spleen	117	1.0144	117	1.0352	0.0208	0		24.31	14.2		2013-02-18	2013-03-22	32	0	0	3.32669	8.14868		0
E2-13	Diet	C-Ag	3	8	2	Mi	Spleen	126	1.0024	126	1.0328	0.0304	0		29.56	15.1		2013-02-18	2013-03-22	32	0	0				0
E2-13	Diet	C-Ag	3	9	3	Mi	Spleen	135	1.0007	135	1.0226	0.0219	0.4		21.36	13.7		2013-02-18	2013-03-22	32	0.437127	19.9601				0.000478442
E2-13	Diet	C-Ag	3	10	4	Mi	Spleen	144	1.0128	144	1.0379	0.0251	0		23.08	13.9		2013-02-18	2013-03-22	32	0	0				0
E2-13	Diet	C-Ag	3	11	5	Mi	Spleen	153	1.0106	153	1.0452	0.0346	0		23.51	14.7		2013-02-18	2013-03-22	32	0	0				0
E2-13	Diet	C-Ag	3	12	6	Mi	Spleen	162	1.0016	162	1.0204	0.0188	0		16.18	12.5		2013-02-18	2013-03-22	32	0	0				0
E2-13	Diet	Cont.	3	13	1	Mi	Spleen	9	1.0169	9	1.0401	0.0232	1		23.87	14.3		2013-02-18	2013-03-22	32	1.09282	47.1042	12.6634	19.3259
E2-13	Diet	Cont.	3	14	2	Mi	Spleen	18	1.0016	18	1.0294	0.0278	0		22.62	13.9		2013-02-18	2013-03-22	32	0	0
E2-13	Diet	Cont.	3	15	3	Mi	Spleen	22	1.0072	22	1.031	0.0238	0.1		30.53	15		2013-02-18	2013-03-22	32	0.109282	4.59167
E2-13	Diet	Cont.	3	16	4	Mi	Spleen	36	1.0128	36	1.0296	0.0168	0		20.81	13.7		2013-02-18	2013-03-22	32	0	0
E2-13	Diet	Cont.	3	17	5	Mi	Spleen	45	1.0112	45	1.0247	0.0135	0.3		13.89	12		2013-02-18	2013-03-22	32	0.327845	24.2848
E2-13	Diet	Cont.	3	18	6	Mi	Spleen	54	1.0374	54	1.0554	0.018	0		14.68	12.3		2013-02-18	2013-03-22	32	0	0
E2-13	Diet	S-Ag	3	19	1	Mi	Spleen	63	1.0027	63	1.0187	0.016	0		16.9	12.5		2013-02-18	2013-03-22	32	0	0	45.0245	69.2093		0
E2-13	Diet	S-Ag	3	20	2	Mi	Spleen	72	1.0022	72	1.022	0.0198	0		28.35	14.5		2013-02-18	2013-03-22	32	0	0				0
E2-13	Diet	S-Ag	3	21	3	Mi	Spleen	81	1.0048	81	1.0285	0.0237	0		27.09	14.3		2013-02-18	2013-03-22	32	0	0				0
E2-13	Diet	S-Ag	3	22	4	Mi	Spleen	90	1.0028	90	1.0338	0.031	0.4		20.81	13.8		2013-02-18	2013-03-22	32	0.437127	14.1009				0.000617213
E2-13	Diet	S-Ag	3	23	5	Mi	Spleen	99	1.01	99	1.0446	0.0346	2.8		25.9	14.1		2013-02-18	2013-03-22	32	3.05989	88.436				0.00387096
E2-13	Diet	S-Ag	3	24	6	Mi	Spleen	108	1.0049	108	1.0212	0.0163	2.5		14.35	11.8		2013-02-18	2013-03-22	32	2.73204	167.61				0.00733651
E2-13	Diet	Ag+	7	25	1	Bi	Bile	382	1.0524	382	1.0856	0.0332	0		16.28	12.7		2013-02-18	2013-03-08	18	0	0	11.5844	17.9669		0	0.00045028	0.000698368
E2-13	Diet	Ag+	7	26	2	Bi	Bile	391	1.0493	391	1.1279	0.0786	2.7		29.45	15.5		2013-02-18	2013-03-08	18	2.83822	36.1097				0.00140357
E2-13	Diet	Ag+	7	27	3	Bi	Bile	400	1.0468	400	1.0731	0.0263	0		15.08	12.7		2013-02-18	2013-03-08	18	0	0				0
E2-13	Diet	Ag+	7	28	4	Bi	Bile	409	1.0482	409	1.1143	0.0661	2.1		26.2	14.9		2013-02-18	2013-03-08	18	2.20751	33.3965				0.00129811
E2-13	Diet	Ag+	7	29	5	Bi	Bile	418	1.0496	418	1.1232	0.0736	0					2013-02-18	2013-03-08	18	0	0				0
E2-13	Diet	Ag+	7	30	6	Bi	Bile	427	1.0505	427	1.1159	0.0654	0					2013-02-18	2013-03-08	18	0	0				0
E2-13	Diet	C-Ag	7	31	1	Bi	Bile	328	1.0168	328	1.0813	0.0645	0.5		28.05	15.1		2013-02-18	2013-03-08	18	0.525597	8.14879	342.124	799.906		0.000195326	0.00037477	0.000447626
E2-13	Diet	C-Ag	7	32	2	Bi	Bile	337	1.0372	337	1.1047	0.0675	2.7		25.76	14.8		2013-02-18	2013-03-08	18	2.83822	42.0478				0.00100788
E2-13	Diet	C-Ag	7	33	3	Bi	Bile	346	1.0244	346	1.0792	0.0548	0		15.58	12.5		2013-02-18	2013-03-08	18	0	0				0
E2-13	Diet	C-Ag	7	34	4	Bi	Bile	355	1.0328	355	1.0996	0.0668	0		25.69	14.7		2013-02-18	2013-03-08	18	0	0				0
E2-13	Diet	C-Ag	7	35	5	Bi	Bile	364	1.035	364	1.1304	0.0954	179.2		26.24	14.9		2013-02-18	2013-03-08	18	188.374	1974.57
E2-13	Diet	C-Ag	7	36	6	Bi	Bile	373	1.0501	373	1.0764	0.0263	0.7		21.71	14.1		2013-02-18	2013-03-08	18	0.735836	27.9785				0.000670643
E2-13	Diet	Cont.	7	37	1	Bi	Bile	220	1.0485	220				0	25.29	14.1
E2-13	Diet	Cont.	7	38	2	Bi	Bile	229	1.0126	229				0	27.15	14.2
E2-13	Diet	Cont.	7	39	3	Bi	Bile	238	1.0198	238				0	26.02	14.1
E2-13	Diet	Cont.	7	40	4	Bi	Bile	247	1.0146	247				0	17.09	12.4
E2-13	Diet	Cont.	7	41	5	Bi	Bile	256	1.0241	256				0	23.34	13.5
E2-13	Diet	Cont.	7	42	6	Bi	Bile	265	1.011	265				0	15.53	11.9
E2-13	Diet	S-Ag	7	43	1	Bi	Bile	274	1.0018	274	1.0786	0.0768	14.7		25.58	14.3		2013-02-18	2013-03-08	18	15.4526	201.205	44.441	80.4417		0.00880702	0.00194524	0.00352104
E2-13	Diet	S-Ag	7	44	2	Bi	Bile	283	1.0154	283	1.0545	0.0391	0		20.55	13.6		2013-02-18	2013-03-08	18	0	0				0
E2-13	Diet	S-Ag	7	45	3	Bi	Bile	292	1.0128	292	1.0811	0.0683	0.3		23.4	14.2		2013-02-18	2013-03-08	18	0.315358	4.61725				0.000202103
E2-13	Diet	S-Ag	7	46	4	Bi	Bile	301	1.0084	301	1.125	0.1166	0		24.23	14.3		2013-02-18	2013-03-08	18	0	0				0
E2-13	Diet	S-Ag	7	47	5	Bi	Bile	310	1.0025	310	1.082	0.0795	4.6		15.96	12.6		2013-02-18	2013-03-08	18	4.83549	60.8238				0.00266234
E2-13	Diet	S-Ag	7	48	6	Bi	Bile	319	1.0119	319	1.1232	0.1113	0		27.43	14.8		2013-02-18	2013-03-08	18	0	0				0
E2-13	Diet	Ag+	7	49	1	Br	Brain	385	1.0526	385	1.1388	0.0862	0		16.28	12.7		2013-02-18			0	0	0	0
E2-13	Diet	Ag+	7	50	2	Br	Brain	394	1.0503	394	1.1723	0.122	0		29.45	15.5		2013-02-18			0	0
E2-13	Diet	Ag+	7	51	3	Br	Brain	403	1.0528	403	1.1377	0.0849	0		15.08	12.7		2013-02-18			0	0
E2-13	Diet	Ag+	7	52	4	Br	Brain	412	1.0459	412	1.156	0.1101	0		26.2	14.9		2013-02-18			0	0
E2-13	Diet	Ag+	7	53	5	Br	Brain	421	1.0505	421	1.1618	0.1113	0					2013-02-18			0	0
E2-13	Diet	Ag+	7	54	6	Br	Brain	430	1.0478	430	1.1774	0.1296	0					2013-02-18			0	0
E2-13	Diet	C-Ag	7	55	1	Br	Brain	331	1.0491	331	1.1754	0.1263	0		28.05	15.1		2013-02-18			0	0	8.66075	16.2511
E2-13	Diet	C-Ag	7	56	2	Br	Brain	340	1.0081	340	1.1358	0.1277	1.3		25.76	14.8		2013-02-18			1.3	10.1801
E2-13	Diet	C-Ag	7	57	3	Br	Brain	349	1.0025	349	1.1058	0.1033	0.1		15.58	12.5		2013-02-18			0.1	0.968054
E2-13	Diet	C-Ag	7	58	4	Br	Brain	358	1.0202	358	1.1333	0.1131	0		25.69	14.7		2013-02-18			0	0
E2-13	Diet	C-Ag	7	59	5	Br	Brain	367	1.0071	367	1.0806	0.0735	3		26.24	14.9		2013-02-18			3	40.8163
E2-13	Diet	C-Ag	7	60	6	Br	Brain	376	1.0612	376	1.1628	0.1016	0		21.71	14.1		2013-02-18			0	0
E2-13	Diet	Cont.	7	61	1	Br	Brain	223	1.0129	223					25.29	14.1							#DIV/0!	#DIV/0!
E2-13	Diet	Cont.	7	62	2	Br	Brain	232	1.0131	232					27.15	14.2
E2-13	Diet	Cont.	7	63	3	Br	Brain	241	1.0393	241					26.02	14.1
E2-13	Diet	Cont.	7	64	4	Br	Brain	250	1.0015	250					17.09	12.4
E2-13	Diet	Cont.	7	65	5	Br	Brain	259	1.0337	259					23.34	13.5
E2-13	Diet	Cont.	7	66	6	Br	Brain	268	1.0386	268					15.53	11.9
E2-13	Diet	S-Ag	7	67	1	Br	Brain	277	1.0183	277	1.1328	0.1145	0		25.58	14.3		2013-02-18			0	0	9.23656	14.3862
E2-13	Diet	S-Ag	7	68	2	Br	Brain	286	1.0113	286	1.1296	0.1183	3		20.55	13.6		2013-02-18			3	25.3593
E2-13	Diet	S-Ag	7	69	3	Br	Brain	295	1.0061	295	1.0955	0.0894	0		23.4	14.2		2013-02-18			0	0
E2-13	Diet	S-Ag	7	70	4	Br	Brain	304	1.0113	304	1.1111	0.0998	3		24.23	14.3		2013-02-18			3	30.0601
E2-13	Diet	S-Ag	7	71	5	Br	Brain	313	1.0226	313	1.1326	0.11	0		15.96	12.6		2013-02-18			0	0
E2-13	Diet	S-Ag	7	72	6	Br	Brain	322	1.0054	322	1.1232	0.1178	0		27.43	14.8		2013-02-18			0	0
E2-13	Diet	Ag+	7	73	1	GC	Gut content	907	1.0466	907	1.1348	0.0882	2365.5		16.28	12.7		2013-02-18	2013-02-22	4	2391.89	27118.9	26367	4639.27
E2-13	Diet	Ag+	7	74	2	GC	Gut content	908	1.0429	908	1.1181	0.0752	2409		29.45	15.5		2013-02-18	2013-02-22	4	2435.88	32392
E2-13	Diet	Ag+	7	75	3	GC	Gut content	909	1.0477	909	1.0871	0.0394	766.8		15.08	12.7		2013-02-18	2013-02-22	4	775.355	19679.1
E2-13	Diet	Ag+	7	76	4	GC	Gut content	910	1.0449	910	1.1143	0.0694	1715.1		26.2	14.9		2013-02-18	2013-02-22	4	1734.23	24989
E2-13	Diet	Ag+	7	77	5	GC	Gut content	911	1.0448	911	1.1287	0.0839	1958.1					2013-02-18	2013-02-22	4	1979.95	23598.9
E2-13	Diet	Ag+	7	78	6	GC	Gut content	912	1.0451	912	1.1675	0.1224	3682.8					2013-02-18	2013-02-22	4	3723.89	30423.9
E2-13	Diet	C-Ag	7	79	1	GC	Gut content	901	1.0453	901	1.1634	0.1181	2762.9		28.05	15.1		2013-02-18	2013-02-22	4	2793.72	23655.6	36637.1	15221
E2-13	Diet	C-Ag	7	80	2	GC	Gut content	902	1.0571	902	1.1594	0.1023	3841.8		25.76	14.8		2013-02-18	2013-02-22	4	3884.66	37973.2
E2-13	Diet	C-Ag	7	81	3	GC	Gut content	903	1.0505	903	1.0914	0.0409	1619.7		15.58	12.5		2013-02-18	2013-02-22	4	1637.77	40043.3
E2-13	Diet	C-Ag	7	82	4	GC	Gut content	904	1.0431	904	1.0942	0.0511	1334.8		25.69	14.7		2013-02-18	2013-02-22	4	1349.69	26412.8
E2-13	Diet	C-Ag	7	83	5	GC	Gut content	905	1.0396	905	1.1667	0.1271	8119.7		26.24	14.9		2013-02-18	2013-02-22	4	8210.29	64597.1
E2-13	Diet	C-Ag	7	84	6	GC	Gut content	906	1.0462	906	1.1211	0.0749	2010.4		21.71	14.1		2013-02-18	2013-02-22	4	2032.83	27140.6
E2-13	Diet	Cont.	7	85	1	GC	Gut content	889	1.0483	889					25.29	14.1
E2-13	Diet	Cont.	7	86	2	GC	Gut content	890	1.0474	890					27.15	14.2
E2-13	Diet	Cont.	7	87	3	GC	Gut content	891	1.0467	891					26.02	14.1
E2-13	Diet	Cont.	7	88	4	GC	Gut content	892	1.0542	892					17.09	12.4
E2-13	Diet	Cont.	7	89	5	GC	Gut content	893	1.0388	893					23.34	13.5
E2-13	Diet	Cont.	7	90	6	GC	Gut content	894	1.053	894					15.53	11.9
E2-13	Diet	S-Ag	7	91	1	GC	Gut content	895	1.0493	895	1.0951	0.0458	1474.4		25.58	14.3		2013-02-18	2013-02-22	4	1490.85	32551.3	25563.4	5844.07
E2-13	Diet	S-Ag	7	92	2	GC	Gut content	896	1.0552	896	1.0886	0.0334	824.3		20.55	13.6		2013-02-18	2013-02-22	4	833.496	24955
E2-13	Diet	S-Ag	7	93	3	GC	Gut content	897	1.0517	897	1.0975	0.0458	1162.8		23.4	14.2		2013-02-18	2013-02-22	4	1175.77	25671.9
E2-13	Diet	S-Ag	7	94	4	GC	Gut content	898	1.0394	898	1.1331	0.0937	2769.5		24.23	14.3		2013-02-18	2013-02-22	4	2800.4	29886.9
E2-13	Diet	S-Ag	7	95	5	GC	Gut content	899	1.0514	899	1.1173	0.0659	1006.6		15.96	12.6		2013-02-18	2013-02-22	4	1017.83	15445.1
E2-13	Diet	S-Ag	7	96	6	GC	Gut content	900	1.052	900	1.2267	0.1747	4296.9		27.43	14.8		2013-02-18	2013-02-22	4	4344.84	24870.3
E2-13	Diet	Ag+	7	1	1	Gi	Gill	379	1.0529	379	1.4382	0.3853	0		16.28	12.7		2013-02-18	2013-02-22	4	0	0	6.90826	4.37923		0	0.000268522	0.000170219
E2-13	Diet	Ag+	7	2	2	Gi	Gill	388	1.07	388	1.5549	0.4849	4.2		29.45	15.5		2013-02-18	2013-02-22	4	4.24686	8.75821				0.000340429
E2-13	Diet	Ag+	7	3	3	Gi	Gill	397	1.0512	397	1.4257	0.3745	1.2		15.08	12.7		2013-02-18	2013-02-22	4	1.21339	3.24002				0.000125939
E2-13	Diet	Ag+	7	4	4	Gi	Gill	406	1.0491	406	1.6163	0.5672	4.7		26.2	14.9		2013-02-18	2013-02-22	4	4.75244	8.37877				0.00032568
E2-13	Diet	Ag+	7	5	5	Gi	Gill	415	1.0499	415	1.4607	0.4108	3.8					2013-02-18	2013-02-22	4	3.84239	9.35344				0.000363565
E2-13	Diet	Ag+	7	6	6	Gi	Gill	424	1.0455	424	1.4424	0.3969	4.6					2013-02-18	2013-02-22	4	4.65132	11.7191				0.000455518
E2-13	Diet	C-Ag	7	7	1	Gi	Gill	325	1.011	325	1.5353	0.5243	32.3		28.05	15.1		2013-02-18	2013-02-22	4	32.6604	62.2933	16.5499	24.1279		0.00149316	0.000396699	0.000578344
E2-13	Diet	C-Ag	7	8	2	Gi	Gill	334	1.0005	334	1.406	0.4055	0.8		25.76	14.8		2013-02-18	2013-02-22	4	0.808925	1.99488				4.78171e-05
E2-13	Diet	C-Ag	7	9	3	Gi	Gill	343	1.0026	343	1.3061	0.3035	0.2		15.58	12.5		2013-02-18	2013-02-22	4	0.202231	0.666331				1.59719e-05
E2-13	Diet	C-Ag	7	10	4	Gi	Gill	352	1.0386	352	1.6153	0.5767	13.9		25.69	14.7		2013-02-18	2013-02-22	4	14.0551	24.3716				0.000584184
E2-13	Diet	C-Ag	7	11	5	Gi	Gill	361	1.0333	361	1.6073	0.574	0.8		26.24	14.9		2013-02-18	2013-02-22	4	0.808925	1.40928				3.37802e-05
E2-13	Diet	C-Ag	7	12	6	Gi	Gill	370	1.0467	370	1.3773	0.3306	2.8		21.71	14.1		2013-02-18	2013-02-22	4	2.83124	8.56394				0.000205277
E2-13	Diet	Cont.	7	13	1	Gi	Gill	217	1.0373	217					25.29	14.1
E2-13	Diet	Cont.	7	14	2	Gi	Gill	226	1.0047	226					27.15	14.2
E2-13	Diet	Cont.	7	15	3	Gi	Gill	235	1.0069	235					26.02	14.1
E2-13	Diet	Cont.	7	16	4	Gi	Gill	244	1.0348	244					17.09	12.4
E2-13	Diet	Cont.	7	17	5	Gi	Gill	252	1.0507	252					23.34	13.5
E2-13	Diet	Cont.	7	18	6	Gi	Gill	262	1.0112	262					15.53	11.9
E2-13	Diet	S-Ag	7	19	1	Gi	Gill	271	0.9994	271	1.4759	0.4765	2.8		25.58	14.3		2013-02-18	2013-02-22	4	2.83124	5.94174	5.1212	5.13246		0.000260078	0.000224162	0.000224655
E2-13	Diet	S-Ag	7	20	2	Gi	Gill	280	1.0188	280	1.4667	0.4479	3.5		20.55	13.6		2013-02-18	2013-02-22	4	3.53905	7.90142				0.000345856
E2-13	Diet	S-Ag	7	21	3	Gi	Gill	289	1.0013	289	1.5426	0.5413	0.3		23.4	14.2		2013-02-18	2013-02-22	4	0.303347	0.560405				2.45297e-05
E2-13	Diet	S-Ag	7	22	4	Gi	Gill	298	1.0381	298	1.406	0.3679	0.3		24.23	14.3		2013-02-18	2013-02-22	4	0.303347	0.824536				3.60911e-05
E2-13	Diet	S-Ag	7	23	5	Gi	Gill	307	1.0172	307	1.4053	0.3881	0.7		15.96	12.6		2013-02-18	2013-02-22	4	0.70781	1.82378				7.98294e-05
E2-13	Diet	S-Ag	7	24	6	Gi	Gill	316	1.0346	316	1.53	0.4954	6.7		27.43	14.8		2013-02-18	2013-02-22	4	6.77475	13.6753				0.000598587
E2-13	Diet	Ag+	7	25	1	Ha	Heart	383	1.0467	383	1.0708	0.0241	0		16.28	12.7		2013-02-18	2013-03-23	33	0	0	27.082	48.8552
E2-13	Diet	Ag+	7	26	2	Ha	Heart	392	1.0505	392	1.1005	0.05	0		29.45	15.5		2013-02-18	2013-03-23	33	0	0
E2-13	Diet	Ag+	7	27	3	Ha	Heart	401	1.0623	401	1.0993	0.037	0		15.08	12.7		2013-02-18	2013-03-23	33	0	0
E2-13	Diet	Ag+	7	28	4	Ha	Heart	410	1.0664	410	1.119	0.0526	2		26.2	14.9		2013-02-18	2013-03-23	33	2.1917	41.6674
E2-13	Diet	Ag+	7	29	5	Ha	Heart	419	1.0484	419	1.0874	0.039	4.3					2013-02-18	2013-03-23	33	4.71216	120.825
E2-13	Diet	Ag+	7	30	6	Ha	Heart	428	1.046	428	1.0863	0.0403	0					2013-02-18	2013-03-23	33	0	0
E2-13	Diet	C-Ag	7	31	1	Ha	Heart	329	1.0147	329	1.0544	0.0397	0		28.05	15.1		2013-02-18	2013-03-23	33	0	0	16.4041	30.3256
E2-13	Diet	C-Ag	7	32	2	Ha	Heart	338	1.0173	338	1.0655	0.0482	0		25.76	14.8		2013-02-18	2013-03-23	33	0	0
E2-13	Diet	C-Ag	7	33	3	Ha	Heart	347	1.0117	347	1.0306	0.0189	1.3		15.58	12.5		2013-02-18	2013-03-23	33	1.42461	75.3761
E2-13	Diet	C-Ag	7	34	4	Ha	Heart	356	1.0069	356	1.0469	0.04	0		25.69	14.7		2013-02-18	2013-03-23	33	0	0
E2-13	Diet	C-Ag	7	35	5	Ha	Heart	365	1.0356	365	1.0879	0.0523	1.1		26.24	14.9		2013-02-18	2013-03-23	33	1.20544	23.0485
E2-13	Diet	C-Ag	7	36	6	Ha	Heart	374	1.0452	374	1.0763	0.0311	0		21.71	14.1		2013-02-18	2013-03-23	33	0	0
E2-13	Diet	Cont.	7	37	1	Ha	Heart	221	1.0081	221					25.29	14.1
E2-13	Diet	Cont.	7	38	2	Ha	Heart	230	1.0069	230					27.15	14.2
E2-13	Diet	Cont.	7	39	3	Ha	Heart	239	1.01	239					26.02	14.1
E2-13	Diet	Cont.	7	40	4	Ha	Heart	248	1.0198	248					17.09	12.4
E2-13	Diet	Cont.	7	41	5	Ha	Heart	257	1.0173	257					23.34	13.5
E2-13	Diet	Cont.	7	42	6	Ha	Heart	266	1.0383	266					15.53	11.9
E2-13	Diet	S-Ag	7	43	1	Ha	Heart	275	1.0141	275	1.0489	0.0348	0		25.58	14.3		2013-02-18	2013-03-23	33	0	0	10.8368	14.694
E2-13	Diet	S-Ag	7	44	2	Ha	Heart	284	1.0376	284	1.0808	0.0432	0		20.55	13.6		2013-02-18	2013-03-23	33	0	0
E2-13	Diet	S-Ag	7	45	3	Ha	Heart	293	1.01	293	1.0519	0.0419	1.3		23.4	14.2		2013-02-18	2013-03-23	33	1.42461	34.0002
E2-13	Diet	S-Ag	7	46	4	Ha	Heart	302	1.0086	302	1.045	0.0364	0.8		24.23	14.3		2013-02-18	2013-03-23	33	0.876682	24.0847
E2-13	Diet	S-Ag	7	47	5	Ha	Heart	311	1.0354	311	1.0664	0.031	0		15.96	12.6		2013-02-18	2013-03-23	33	0	0
E2-13	Diet	S-Ag	7	48	6	Ha	Heart	320	1.013	320	1.0604	0.0474	0.3		27.43	14.8		2013-02-18	2013-03-23	33	0.328756	6.93577
E2-13	Diet	Ag+	7	49	1	Int.	Intestines	384	1.056	384	2.2091	1.1531	400.2		16.28	12.7		2013-02-18	2013-03-08	18	420.688	364.832	607.253	248.691		0.0141809	0.0236037	0.00966656
E2-13	Diet	Ag+	7	50	2	Int.	Intestines	393	1.047	393	2.2881	1.2411	702.8		29.45	15.5		2013-02-18	2013-03-08	18	738.779	595.262				0.0231376
E2-13	Diet	Ag+	7	51	3	Int.	Intestines	402	1.0501	402	1.6929	0.6428	571.4		15.08	12.7		2013-02-18	2013-03-08	18	600.652	934.431				0.036321
E2-13	Diet	Ag+	7	52	4	Int.	Intestines	411	1.0507	411	2.1906	1.1399	901.8		26.2	14.9		2013-02-18	2013-03-08	18	947.967	831.623				0.0323249
E2-13	Diet	Ag+	7	53	5	Int.	Intestines	420	1.0479	420	2.4383	1.3904	400.1					2013-02-18	2013-03-08	18	420.583	302.49				0.0117577
E2-13	Diet	Ag+	7	54	6	Int.	Intestines	429	1.0501	429	1.9873	0.9372	548.2					2013-02-18	2013-03-08	18	576.264	614.879				0.0239001
E2-13	Diet	C-Ag	7	55	1	Int.	Intestines	330	1.0001	330	2.4867	1.4866	481.5		28.05	15.1		2013-02-18	2013-03-08	18	506.15	340.475	1391.72	701.999		0.00816115	0.0333594	0.0168268
E2-13	Diet	C-Ag	7	56	2	Int.	Intestines	339	1.0042	339	2.2362	1.232	908.7		25.76	14.8		2013-02-18	2013-03-08	18	955.22	775.341				0.0185848
E2-13	Diet	C-Ag	7	57	3	Int.	Intestines	348	1.0119	348	1.7196	0.7077	1270.3		15.58	12.5		2013-02-18	2013-03-08	18	1335.33	1886.86				0.0452279
E2-13	Diet	C-Ag	7	58	4	Int.	Intestines	357	1.0503	357	2.4884	1.4381	2873.4		25.69	14.7		2013-02-18	2013-03-08	18	3020.5	2100.34				0.050345
E2-13	Diet	C-Ag	7	59	5	Int.	Intestines	366	1.0383	366	2.467	1.4287	1868.2		26.24	14.9		2013-02-18	2013-03-08	18	1963.84	1374.56				0.0329482
E2-13	Diet	C-Ag	7	60	6	Int.	Intestines	375	1.0502	375	2.3245	1.2743	2270.2		21.71	14.1		2013-02-18	2013-03-08	18	2386.42	1872.73				0.0448891
E2-13	Diet	Cont.	7	61	1	Int.	Intestines	222	1.0217	222					25.29	14.1
E2-13	Diet	Cont.	7	62	2	Int.	Intestines	231	1.0067	231					27.15	14.2
E2-13	Diet	Cont.	7	63	3	Int.	Intestines	240	1.0059	240					26.02	14.1
E2-13	Diet	Cont.	7	64	4	Int.	Intestines	249	1.0251	249					17.09	12.4
E2-13	Diet	Cont.	7	65	5	Int.	Intestines	258	1.0018	258					23.34	13.5
E2-13	Diet	Cont.	7	66	6	Int.	Intestines	267	1.0342	267					15.53	11.9
E2-13	Diet	S-Ag	7	67	1	Int.	Intestines	276	1.0116	276	2.3022	1.2906	1097		25.58	14.3		2013-02-18	2013-03-08	18	1153.16	893.507	986.381	86.3299		0.03911	0.0431752	0.00377877
E2-13	Diet	S-Ag	7	68	2	Int.	Intestines	285	1.006	285	2.105	1.099	1097.7		20.55	13.6		2013-02-18	2013-03-08	18	1153.9	1049.95				0.0459577
E2-13	Diet	S-Ag	7	69	3	Int.	Intestines	294	1.0395	294	1.951	0.9115	959.7		23.4	14.2		2013-02-18	2013-03-08	18	1008.83	1106.78				0.0484453
E2-13	Diet	S-Ag	7	70	4	Int.	Intestines	303	1.0166	303	2.2488	1.2322	1159.8		24.23	14.3		2013-02-18	2013-03-08	18	1219.17	989.429				0.0433086
E2-13	Diet	S-Ag	7	71	5	Int.	Intestines	312	1.0149	312	1.692	0.6771	639.3		15.96	12.6		2013-02-18	2013-03-08	18	672.028	992.51				0.0434435
E2-13	Diet	S-Ag	7	72	6	Int.	Intestines	321	1.0125	321	2.4503	1.4378	1212		27.43	14.8		2013-02-18	2013-03-08	18	1274.05	886.109				0.0387862
E2-13	Diet	Ag+	7	73	1	Ki	Kidney	381	1.046	381	1.1863	0.1403	4.7		16.28	12.7		2013-02-18	2013-02-21	3	4.73927	33.7796	7.60709	13.6717		0.001313	0.000295685	0.000531416
E2-13	Diet	Ag+	7	74	2	Ki	Kidney	390	1.0526	390	1.2669	0.2143	0		29.45	15.5		2013-02-18	2013-02-21	3	0	0				0
E2-13	Diet	Ag+	7	75	3	Ki	Kidney	399	1.0617	399	1.176	0.1143	0		15.08	12.7		2013-02-18	2013-02-21	3	0	0				0
E2-13	Diet	Ag+	7	76	4	Ki	Kidney	408	1.0446	408	1.2486	0.204	2.4		26.2	14.9		2013-02-18	2013-02-21	3	2.42005	11.863				0.000461111
E2-13	Diet	Ag+	7	77	5	Ki	Kidney	417	1.0518	417	1.238	0.1862	0					2013-02-18	2013-02-21	3	0	0				0
E2-13	Diet	Ag+	7	78	6	Ki	Kidney	426	1.0566	426	1.212	0.1554	0					2013-02-18	2013-02-21	3	0	0				0
E2-13	Diet	C-Ag	7	79	1	Ki	Kidney	327	1.0471	327	1.2579	0.2108	1.5		28.05	15.1		2013-02-18	2013-02-21	3	1.51253	7.17521	9.02777	12.2499		0.000278898	0.000350906	0.000476151
E2-13	Diet	C-Ag	7	80	2	Ki	Kidney	336	1.017	336	1.2152	0.1982	0		25.76	14.8		2013-02-18	2013-02-21	3	0	0				0
E2-13	Diet	C-Ag	7	81	3	Ki	Kidney	345	1.0314	345	1.1499	0.1185	0.5		15.58	12.5		2013-02-18	2013-02-21	3	0.504178	4.25467				0.000165377
E2-13	Diet	C-Ag	7	82	4	Ki	Kidney	354	1.0046	354	1.2054	0.2008	2		25.69	14.7		2013-02-18	2013-02-21	3	2.01671	10.0434				0.000390383
E2-13	Diet	C-Ag	7	83	5	Ki	Kidney	363	1.0125	363	1.2284	0.2159	7		26.24	14.9		2013-02-18	2013-02-21	3	7.05849	32.6933				0.00127078
E2-13	Diet	C-Ag	7	84	6	Ki	Kidney	372	1.0511	372	1.1769	0.1258	0		21.71	14.1		2013-02-18	2013-02-21	3	0	0				0
E2-13	Diet	Cont.	7	85	1	Ki	Kidney	219	1.0344	219				0	25.29	14.1
E2-13	Diet	Cont.	7	86	2	Ki	Kidney	228	1.0419	228				0	27.15	14.2
E2-13	Diet	Cont.	7	87	3	Ki	Kidney	237	1.0015	237				0	26.02	14.1
E2-13	Diet	Cont.	7	88	4	Ki	Kidney	246	1.0261	246				0	17.09	12.4
E2-13	Diet	Cont.	7	89	5	Ki	Kidney	255	1.0051	255				0	23.34	13.5
E2-13	Diet	Cont.	7	90	6	Ki	Kidney	264	1.0013	264				0	15.53	11.9
E2-13	Diet	S-Ag	7	91	1	Ki	Kidney	273	1.0012	273	1.2027	0.2015	2		25.58	14.3		2013-02-18	2013-02-21	3	2.01671	10.0085	12.2311	14.2373		0.000438085	0.000535373	0.000623185
E2-13	Diet	S-Ag	7	92	2	Ki	Kidney	282	1.0084	282	1.1783	0.1699	1.5		20.55	13.6		2013-02-18	2013-02-21	3	1.51253	8.90249				0.000389674
E2-13	Diet	S-Ag	7	93	3	Ki	Kidney	291	1.035	291	1.2393	0.2043	8		23.4	14.2		2013-02-18	2013-02-21	3	8.06685	39.4853				0.00172832
E2-13	Diet	S-Ag	7	94	4	Ki	Kidney	300	1.0025	300	1.1532	0.1507	0.3		24.23	14.3		2013-02-18	2013-02-21	3	0.302507	2.00734				8.78641e-05
E2-13	Diet	S-Ag	7	95	5	Ki	Kidney	309	1.0262	309	1.1185	0.0923	0		15.96	12.6		2013-02-18	2013-02-21	3	0	0				0
E2-13	Diet	S-Ag	7	96	6	Ki	Kidney	318	1.0262	318	1.3291	0.3029	3.9		27.43	14.8		2013-02-18	2013-02-21	3	3.93259	12.9831				0.000568289
E2-13	Diet	Ag+	7	1	1	Li	Liver	380	1.0474	380	1.2318	0.1844	13.5		16.28	12.7		2013-02-18	2013-03-06	16	14.1126	76.5326	60.9022	20.8488		0.0029748	0.00236725	0.000810387
E2-13	Diet	Ag+	7	2	2	Li	Liver	389	1.0582	389	1.4385	0.3803	22.8		29.45	15.5		2013-02-18	2013-03-06	16	23.8346	62.6732				0.00243609
E2-13	Diet	Ag+	7	3	3	Li	Liver	398	1.0473	398	1.2489	0.2016	13.7		15.08	12.7		2013-02-18	2013-03-06	16	14.3217	71.0401				0.00276131
E2-13	Diet	Ag+	7	4	4	Li	Liver	407	1.0483	407	1.3367	0.2884	17.7		26.2	14.9		2013-02-18	2013-03-06	16	18.5032	64.1581				0.00249381
E2-13	Diet	Ag+	7	5	5	Li	Liver	416	1.0487	416	1.2933	0.2446	16.7					2013-02-18	2013-03-06	16	17.4578	71.373				0.00277424
E2-13	Diet	Ag+	7	6	6	Li	Liver	425	1.0618	425	1.2854	0.2236	4.2					2013-02-18	2013-03-06	16	4.39059	19.6359	23.8964	18.3912		0.000763241
E2-13	Diet	C-Ag	7	7	1	Li	Liver	326	1.0487	326	1.3934	0.3447	1.9		28.05	15.1		2013-02-18	2013-03-06	16	1.98622	5.76217				0.000138119	0.000558048	0.000446379
E2-13	Diet	C-Ag	7	8	2	Li	Liver	335	1.0111	335	1.3186	0.3075	7.1		25.76	14.8		2013-02-18	2013-03-06	16	7.42219	24.1372				0.000578566
E2-13	Diet	C-Ag	7	9	3	Li	Liver	344	1.0434	344	1.2564	0.213	4.4		15.58	12.5		2013-02-18	2013-03-06	16	4.59967	21.5947				0.000517622
E2-13	Diet	C-Ag	7	10	4	Li	Liver	353	1.0049	353	1.2923	0.2874	16.2		25.69	14.7		2013-02-18	2013-03-06	16	16.9351	58.9253				0.00141243
E2-13	Diet	C-Ag	7	11	5	Li	Liver	362	1.0363	362	1.358	0.3217	4.1		26.24	14.9		2013-02-18	2013-03-06	16	4.28605	13.3231				0.000319354
E2-13	Diet	C-Ag	7	12	6	Li	Liver	371	1.0495	371	1.3642	0.3147	4.8		21.71	14.1		2013-02-18	2013-03-06	16	5.01782	15.9448				0.000382194
E2-13	Diet	Cont.	7	13	1	Li	Liver	218	1.0114	218					25.29	14.1
E2-13	Diet	Cont.	7	14	2	Li	Liver	227	1.0219	227					27.15	14.2
E2-13	Diet	Cont.	7	15	3	Li	Liver	236	1.0039	236					26.02	14.1
E2-13	Diet	Cont.	7	16	4	Li	Liver	245	1.0129	245					17.09	12.4
E2-13	Diet	Cont.	7	17	5	Li	Liver	254	1.0381	254					23.34	13.5
E2-13	Diet	Cont.	7	18	6	Li	Liver	263	1.0059	263					15.53	11.9
E2-13	Diet	S-Ag	7	19	1	Li	Liver	272	1.0094	272	1.3363	0.3269	31.4		25.58	14.3		2013-02-18	2013-03-06	16	32.8249	100.413	55.1707	31.176		0.0043952	0.00241489	0.00136461
E2-13	Diet	S-Ag	7	20	2	Li	Liver	281	1.0094	281	1.2989	0.2895	21.4		20.55	13.6		2013-02-18	2013-03-06	16	22.3711	77.275				0.00338243
E2-13	Diet	S-Ag	7	21	3	Li	Liver	290	1.0341	290	1.4001	0.366	12.1		23.4	14.2		2013-02-18	2013-03-06	16	12.6491	34.5603				0.00151275
E2-13	Diet	S-Ag	7	22	4	Li	Liver	299	1.0195	299	1.3903	0.3708	23		24.23	14.3		2013-02-18	2013-03-06	16	24.0437	64.8428				0.00283826
E2-13	Diet	S-Ag	7	23	5	Li	Liver	308	1.0381	308	1.1977	0.1596	5.7		15.96	12.6		2013-02-18	2013-03-06	16	5.95866	37.335				0.0016342
E2-13	Diet	S-Ag	7	24	6	Li	Liver	317	1.0019	317	1.3294	0.3275	5.2		27.43	14.8		2013-02-18	2013-03-06	16	5.43597	16.5984				0.000726533
E2-13	Diet	Ag+	7	25	1	Mi	Spleen	387	1.0544	387	1.067	0.0126	0		16.28	12.7		2013-02-18	2013-03-22	32	0	0	28.7329	65.8924		0
E2-13	Diet	Ag+	7	26	2	Mi	Spleen	396	1.0611	396	1.0963	0.0352	0		29.45	15.5		2013-02-18	2013-03-22	32	0	0				0
E2-13	Diet	Ag+	7	27	3	Mi	Spleen	405	1.0504	405	1.0685	0.0181	2.7		15.08	12.7		2013-02-18	2013-03-22	32	2.9506	163.017				0.00633641
E2-13	Diet	Ag+	7	28	4	Mi	Spleen	414	1.0506	414	1.0763	0.0257	0		26.2	14.9		2013-02-18	2013-03-22	32	0	0				0
E2-13	Diet	Ag+	7	29	5	Mi	Spleen	423	1.0508	423	1.0757	0.0249	0					2013-02-18	2013-03-22	32	0	0				0
E2-13	Diet	Ag+	7	30	6	Mi	Spleen	432	1.0508	432	1.0741	0.0233	0.2					2013-02-18	2013-03-22	32	0.218563	9.3804				0.000364613
E2-13	Diet	C-Ag	7	31	1	Mi	Spleen	333	1.0483	333	1.0903	0.042	0		28.05	15.1		2013-02-18	2013-03-22	32	0	0	35.1354	56.1298		0
E2-13	Diet	C-Ag	7	32	2	Mi	Spleen	342	1.0101	342	1.0375	0.0274	0		25.76	14.8		2013-02-18	2013-03-22	32	0	0				0
E2-13	Diet	C-Ag	7	33	3	Mi	Spleen	351	1.0113	351	1.0328	0.0215	2.5		15.58	12.5		2013-02-18	2013-03-22	32	2.73204	127.072				0.00304589
E2-13	Diet	C-Ag	7	34	4	Mi	Spleen	360	1.0057	360	1.0318	0.0261	2		25.69	14.7		2013-02-18	2013-03-22	32	2.18563	83.7407				0.00200726
E2-13	Diet	C-Ag	7	35	5	Mi	Spleen	369	1.0122	369	1.0487	0.0365	0		26.24	14.9		2013-02-18	2013-03-22	32	0	0				0
E2-13	Diet	C-Ag	7	36	6	Mi	Spleen	378	1.0519	378	1.0774	0.0255	0		21.71	14.1		2013-02-18	2013-03-22	32	0	0				0
E2-13	Diet	Cont.	7	37	1	Mi	Spleen	225	1.0186	225					25.29	14.1
E2-13	Diet	Cont.	7	38	2	Mi	Spleen	234	1.0132	234					27.15	14.2
E2-13	Diet	Cont.	7	39	3	Mi	Spleen	243	1.0354	243					26.02	14.1
E2-13	Diet	Cont.	7	40	4	Mi	Spleen	251	1.0186	251					17.09	12.4
E2-13	Diet	Cont.	7	41	5	Mi	Spleen	261	1.003	261					23.34	13.5
E2-13	Diet	Cont.	7	42	6	Mi	Spleen	270	1.0127	270					15.53	11.9
E2-13	Diet	S-Ag	7	43	1	Mi	Spleen	279	1.0175	279	1.0582	0.0407	0		25.58	14.3		2013-02-18	2013-03-22	32	0	0	4.24984	10.4099		0
E2-13	Diet	S-Ag	7	44	2	Mi	Spleen	288	1.0404	288	1.0748	0.0344	0		20.55	13.6		2013-02-18	2013-03-22	32	0	0				0
E2-13	Diet	S-Ag	7	45	3	Mi	Spleen	297	1.0136	297	1.0736	0.06	1.4		23.4	14.2		2013-02-18	2013-03-22	32	1.52994	25.4991				0.00111613
E2-13	Diet	S-Ag	7	46	4	Mi	Spleen	306	1.0168	306	1.05	0.0332	0		24.23	14.3		2013-02-18	2013-03-22	32	0	0				0
E2-13	Diet	S-Ag	7	47	5	Mi	Spleen	315	1.05	315	1.0578	0.0078	0		15.96	12.6		2013-02-18	2013-03-22	32	0	0				0
E2-13	Diet	S-Ag	7	48	6	Mi	Spleen	324	1.0164	324	1.0458	0.0294	0		27.43	14.8		2013-02-18	2013-03-22	32	0	0				0
E2-13	Diet	Ag+	24	49	1	Bi	Bile	598	1.0611	598	1.1168	0.0557	3.6		18.71	13.5		2013-02-18	2013-03-08	18	3.7843	67.9407	36.2696	39.3257		0.00264083	0.000939857	0.00138994
E2-13	Diet	Ag+	24	50	2	Bi	Bile	606	1.0508	606					14.26	12.5										0
E2-13	Diet	Ag+	24	51	3	Bi	Bile	616	1.0464	616	1.1382	0.0918	0.4		23.87	14.7		2013-02-18	2013-03-08	18	0.420478	4.58037				0.000178037
E2-13	Diet	Ag+	24	52	4	Bi	Bile	625	1.0471	625	1.1073	0.0602	0		19.91	13.5		2013-02-18	2013-03-08	18	0	0				0
E2-13	Diet	Ag+	24	53	5	Bi	Bile	634	1.0562	634	1.1156	0.0594	4.1		15.59	12.7		2013-02-18	2013-03-08	18	4.30989	72.5572				0.00282027
E2-13	Diet	Ag+	24	54	6	Bi	Bile	643	1.0503	643					x	x										0
E2-13	Diet	C-Ag	24	55	1	Bi	Bile	544	1.0459	544	1.123	0.0771	3.3		24.65	14.5		2013-02-18	2013-03-08	18	3.46894	44.9927	20.7132	23.4252		0.00107847	0.000413744	0.00054158
E2-13	Diet	C-Ag	24	56	2	Bi	Bile	553	1.0476	553	1.1267	0.0791	0.9		21.36	13.7		2013-02-18	2013-03-08	18	0.946075	11.9605				0.000286692
E2-13	Diet	C-Ag	24	57	3	Bi	Bile	562	1.0511	562	1.1105	0.0594	0		24.33	14.3		2013-02-18	2013-03-08	18	0	0				0
E2-13	Diet	C-Ag	24	58	4	Bi	Bile	571	1.0533	571					28.9	15.3										0
E2-13	Diet	C-Ag	24	59	5	Bi	Bile	580	1.0516	580	1.1067	0.0551	0		23.31	14.2		2013-02-18	2013-03-08	18	0	0				0
E2-13	Diet	C-Ag	24	60	6	Bi	Bile	589	1.0516	589	1.117	0.0654	2.9		17.7	13.1		2013-02-18	2013-03-08	18	3.04846	46.6126				0.0011173
E2-13	Diet	Cont.	24	61	1	Bi	Bile	436	1.0487	436	1.1175	0.0688	1.6	0	27.93	15.1		2013-02-18	2013-03-08	18	1.68191	24.4464	21.7902	33.1522
E2-13	Diet	Cont.	24	62	2	Bi	Bile	445	1.0479	445	1.1355	0.0876	0	0	26.26	14.7		2013-02-18	2013-03-08	18	0	0
E2-13	Diet	Cont.	24	63	3	Bi	Bile	454	1.0517	454	1.0898	0.0381	3.1	0	19.23	13.5		2013-02-18	2013-03-08	18	3.2587	85.5302
E2-13	Diet	Cont.	24	64	4	Bi	Bile	463	1.0529	463	1.0944	0.0415	0	0	24.07	14.1		2013-02-18	2013-03-08	18	0	0
E2-13	Diet	Cont.	24	65	5	Bi	Bile	472	1.0529	472	1.1247	0.0718	0	0	31.7	15.8		2013-02-18	2013-03-08	18	0	0
E2-13	Diet	Cont.	24	66	6	Bi	Bile	481	1.0525	481	1.093	0.0405	0.8	0	20.11	13.7		2013-02-18	2013-03-08	18	0.840955	20.7643
E2-13	Diet	S-Ag	24	67	1	Bi	Bile	490	1.0522	490	1.1043	0.0521	7.1		18.42	13.8		2013-02-18	2013-03-08	18	7.46348	143.253	103.594	52.8818		0.00627037	0.00453447	0.00231471
E2-13	Diet	S-Ag	24	68	2	Bi	Bile	499	1.0515	499	1.1116	0.0601	8.1		17.36	13.4		2013-02-18	2013-03-08	18	8.51467	141.675				0.00620131
E2-13	Diet	S-Ag	24	69	3	Bi	Bile	508	1.0481	508	1.1055	0.0574	8.4		15.8	12.7		2013-02-18	2013-03-08	18	8.83003	153.833				0.00673349
E2-13	Diet	S-Ag	24	70	4	Bi	Bile	517	1.0675	517	1.1505	0.083	3.2		28.02	15		2013-02-18	2013-03-08	18	3.36382	40.528				0.00177396
E2-13	Diet	S-Ag	24	71	5	Bi	Bile	526	1.0504	526	1.1046	0.0542	1.9		20.49	13.7		2013-02-18	2013-03-08	18	1.99727	36.85				0.00161297
E2-13	Diet	S-Ag	24	72	6	Bi	Bile	535	1.0499	535	1.1865	0.1366	13.7		30.05	15.2		2013-02-18	2013-03-08	18	14.4014	105.427				0.00461469
E2-13	Diet	Ag+	24	73	1	Br	Brain	601	1.0463	601	1.1509	0.1046	0		18.71	13.5		2013-02-18			0	0	0	0
E2-13	Diet	Ag+	24	74	2	Br	Brain	609	1.0678	609	1.1215	0.0537	0		14.26	12.5		2013-02-18			0	0
E2-13	Diet	Ag+	24	75	3	Br	Brain	619	1.0506	619	1.1849	0.1343	0		23.87	14.7		2013-02-18			0	0
E2-13	Diet	Ag+	24	76	4	Br	Brain	628	1.0488	628	1.1424	0.0936	0		19.91	13.5		2013-02-18			0	0
E2-13	Diet	Ag+	24	77	5	Br	Brain	637	1.0579	637	1.1533	0.0954	0		15.59	12.7		2013-02-18			0	0
E2-13	Diet	Ag+	24	78	6	Br	Brain	646	1.0461	646					x	x
E2-13	Diet	C-Ag	24	79	1	Br	Brain	547	1.0466	547	1.1593	0.1127	0		24.65	14.5		2013-02-18			0	0	1.82823	3.97785
E2-13	Diet	C-Ag	24	80	2	Br	Brain	556	1.0503	556	1.1459	0.0956	0		21.36	13.7		2013-02-18			0	0
E2-13	Diet	C-Ag	24	81	3	Br	Brain	565	1.0503	565	1.1412	0.0909	0.9		24.33	14.3		2013-02-18			0.9	9.90099
E2-13	Diet	C-Ag	24	82	4	Br	Brain	574	1.0448	574	1.1633	0.1185	0		28.9	15.3		2013-02-18			0	0
E2-13	Diet	C-Ag	24	83	5	Br	Brain	583	1.0672	583	1.1608	0.0936	0.1		23.31	14.2		2013-02-18			0.1	1.06838
E2-13	Diet	C-Ag	24	84	6	Br	Brain	592	1.0492	592	1.1046	0.0554	0		17.7	13.1		2013-02-18			0	0
E2-13	Diet	Cont.	24	85	1	Br	Brain	439	1.0495	439	1.1915	0.142	0		27.93	15.1		2013-02-18			0	0
E2-13	Diet	Cont.	24	86	2	Br	Brain	448	1.053	448	1.1868	0.1338	0		26.26	14.7		2013-02-18			0	0	3.2144	7.87364
E2-13	Diet	Cont.	24	87	3	Br	Brain	457	1.0545	457	1.1312	0.0767	0		19.23	13.5		2013-02-18			0	0
E2-13	Diet	Cont.	24	88	4	Br	Brain	466	1.0569	466	1.1449	0.088	0		24.07	14.1		2013-02-18			0	0
E2-13	Diet	Cont.	24	89	5	Br	Brain	475	1.0499	475	1.187	0.1371	0		31.7	15.8		2013-02-18			0	0
E2-13	Diet	Cont.	24	90	6	Br	Brain	484	1.0683	484	1.1662	0.0979	0		20.11	13.7		2013-02-18			0	0
E2-13	Diet	S-Ag	24	91	1	Br	Brain	493	1.0502	493	1.1539	0.1037	2		18.42	13.8		2013-02-18			2	19.2864	5.52922	8.73422
E2-13	Diet	S-Ag	24	92	2	Br	Brain	502	1.0568	502	1.1552	0.0984	0		17.36	13.4		2013-02-18			0	0
E2-13	Diet	S-Ag	24	93	3	Br	Brain	511	1.0534	511	1.1384	0.085	0		15.8	12.7		2013-02-18			0	0
E2-13	Diet	S-Ag	24	94	4	Br	Brain	520	1.0512	520	1.1704	0.1192	0		28.02	15		2013-02-18			0	0
E2-13	Diet	S-Ag	24	95	5	Br	Brain	529	1.0488	529	1.1525	0.1037	0		20.49	13.7		2013-02-18			0	0
E2-13	Diet	S-Ag	24	96	6	Br	Brain	538	1.0517	538	1.1741	0.1224	1.7		30.05	15.2		2013-02-18			1.7	13.8889
E2-13	Diet	Ag+	24	1	1	GC	Gut content	931	1.057	931	1.2343	0.1773	3539.3		18.71	13.5		2013-02-18	2013-02-22	4	3578.79	20184.9	22500.2	3733.98
E2-13	Diet	Ag+	24	2	2	GC	Gut content	932	1.0462	932	1.154	0.1078	2224.8		14.26	12.5		2013-02-18	2013-02-22	4	2249.62	20868.5
E2-13	Diet	Ag+	24	3	3	GC	Gut content	933	1.0467	933	1.0746	0.0279	694.6		23.87	14.7		2013-02-18	2013-02-22	4	702.349	25173.8
E2-13	Diet	Ag+	24	4	4	GC	Gut content	934	1.0483	934	1.1313	0.083	2265.3		19.91	13.5		2013-02-18	2013-02-22	4	2290.57	27597.3
E2-13	Diet	Ag+	24	5	5	GC	Gut content	935	1.0585	935	1.1658	0.1073	1981.9		15.59	12.7		2013-02-18	2013-02-22	4	2004.01	18676.7
E2-13	Diet	Ag+	24	6	6	GC	Gut content	936	1.0568	936					x	x
E2-13	Diet	C-Ag	24	7	1	GC	Gut content	925	1.0594	925	1.1304	0.071	3332.2		24.65	14.5		2013-02-18	2013-02-22	4	3369.38	47456	37084.9	23399.7
E2-13	Diet	C-Ag	24	8	2	GC	Gut content	926	1.0452	926	1.1237	0.0785	2526.3		21.36	13.7		2013-02-18	2013-02-22	4	2554.48	32541.2
E2-13	Diet	C-Ag	24	9	3	GC	Gut content	927	1.055	927	1.1833	0.1283	5189.1		24.33	14.3		2013-02-18	2013-02-22	4	5246.99	40896.3
E2-13	Diet	C-Ag	24	10	4	GC	Gut content	928	1.0568	928	1.1376	0.0808	5735.6		28.9	15.3		2013-02-18	2013-02-22	4	5799.59	71777.1
E2-13	Diet	C-Ag	24	11	5	GC	Gut content	929	1.0446	929	1.1569	0.1123	3244.8		23.31	14.2		2013-02-18	2013-02-22	4	3281	29216.4
E2-13	Diet	C-Ag	24	12	6	GC	Gut content	930	1.047	930	1.0821	0.0351	21.6		17.7	13.1		2013-02-18	2013-02-22	4	21.841	622.25
E2-13	Diet	Cont.	24	13	1	GC	Gut content	913	1.0379	913	1.1762	0.1383	19.9		27.93	15.1		2013-02-18	2013-02-22	4	20.122	145.495	470.783	658.577
E2-13	Diet	Cont.	24	14	2	GC	Gut content	914	1.0565	914	1.1252	0.0687	20.3		26.26	14.7		2013-02-18	2013-02-22	4	20.5265	298.784
E2-13	Diet	Cont.	24	15	3	GC	Gut content	915	1.047	915	1.1393	0.0923	20.3		19.23	13.5		2013-02-18	2013-02-22	4	20.5265	222.389
E2-13	Diet	Cont.	24	16	4	GC	Gut content	916	1.0541	916	1.1486	0.0945	169		24.07	14.1		2013-02-18	2013-02-22	4	170.885	1808.31
E2-13	Diet	Cont.	24	17	5	GC	Gut content	917	1.0501	917	1.2177	0.1676	18.9		31.7	15.8		2013-02-18	2013-02-22	4	19.1109	114.027
E2-13	Diet	Cont.	24	18	6	GC	Gut content	918	1.039	918	1.1085	0.0695	16.2		20.11	13.7		2013-02-18	2013-02-22	4	16.3807	235.694
E2-13	Diet	S-Ag	24	19	1	GC	Gut content	919	1.0456	919	1.2156	0.17	2674.1		18.42	13.8		2013-02-18	2013-02-22	4	2703.93	15905.5	22496.6	5193.72
E2-13	Diet	S-Ag	24	20	2	GC	Gut content	920	1.0574	920	1.1832	0.1258	2419.3		17.36	13.4		2013-02-18	2013-02-22	4	2446.29	19445.9
E2-13	Diet	S-Ag	24	21	3	GC	Gut content	921	1.0531	921	1.0871	0.034	949.1		15.8	12.7		2013-02-18	2013-02-22	4	959.689	28226.1
E2-13	Diet	S-Ag	24	22	4	GC	Gut content	922	1.04	922	1.1208	0.0808	2127.5		28.02	15		2013-02-18	2013-02-22	4	2151.24	26624.2
E2-13	Diet	S-Ag	24	23	5	GC	Gut content	923	1.0439	923	1.1214	0.0775	1408.3		20.49	13.7		2013-02-18	2013-02-22	4	1424.01	18374.3
E2-13	Diet	S-Ag	24	24	6	GC	Gut content	924	1.0569	924	1.1387	0.0818	2136		30.05	15.2		2013-02-18	2013-02-22	4	2159.83	26403.8
E2-13	Diet	Ag+	24	25	1	Gi	Gill	595	1.0535	595	1.519	0.4655	2.4		18.71	13.5		2013-02-18	2013-02-22	4	2.42678	5.21327	10.5914	8.77632		0.000202638	0.000343071	0.000348346
E2-13	Diet	Ag+	24	26	2	Gi	Gill	604	1.051	604	1.3478	0.2968	7.6		14.26	12.5		2013-02-18	2013-02-22	4	7.68479	25.8921				0.00100642
E2-13	Diet	Ag+	24	27	3	Gi	Gill	613	1.0503	613	1.5261	0.4758	3.3		23.87	14.7		2013-02-18	2013-02-22	4	3.33682	7.01307				0.000272596
E2-13	Diet	Ag+	24	28	4	Gi	Gill	622	1.0509	622	1.4589	0.408	2		19.91	13.5		2013-02-18	2013-02-22	4	2.02231	4.95665				0.000192663
E2-13	Diet	Ag+	24	29	5	Gi	Gill	631	1.0452	631	1.3624	0.3172	3.1		15.59	12.7		2013-02-18	2013-02-22	4	3.13459	9.88205				0.000384112
E2-13	Diet	Ag+	24	30	6	Gi	Gill	640	1.0484	640					x	x										0
E2-13	Diet	C-Ag	24	31	1	Gi	Gill	541	1.0517	541	1.5613	0.5096	4.6		24.65	14.5		2013-02-18	2013-02-22	4	4.65132	9.12739	25.2205	39.2397		0.000218783	0.000604533	0.000940571
E2-13	Diet	C-Ag	24	32	2	Gi	Gill	550	1.0462	550	1.4769	0.4307	11.1		21.36	13.7		2013-02-18	2013-02-22	4	11.2238	26.0595				0.000624644
E2-13	Diet	C-Ag	24	33	3	Gi	Gill	559	1.0447	559	1.5884	0.5437	3		24.33	14.3		2013-02-18	2013-02-22	4	3.03347	5.57931				0.000133735
E2-13	Diet	C-Ag	24	34	4	Gi	Gill	568	1.0479	568	1.688	0.6401	4.6		28.9	15.3		2013-02-18	2013-02-22	4	4.65132	7.26655				0.000174178
E2-13	Diet	C-Ag	24	35	5	Gi	Gill	577	1.0581	577	1.5789	0.5208	53.2		23.31	14.2		2013-02-18	2013-02-22	4	53.7935	103.29				0.00247585
E2-13	Diet	C-Ag	24	36	6	Gi	Gill	586	1.0505	586	1.3847	0.3342	0		17.7	13.1		2013-02-18	2013-02-22	4	0	0				0
E2-13	Diet	Cont.	24	37	1	Gi	Gill	433	1.0584	433	1.6482	0.5898	2.6	0	27.93	15.1		2013-02-18	2013-02-22	4	2.62901	4.45746	1.89999	3.04656
E2-13	Diet	Cont.	24	38	2	Gi	Gill	442	1.0601	442	1.662	0.6019	0	0	26.26	14.7		2013-02-18	2013-02-22	4	0	0
E2-13	Diet	Cont.	24	39	3	Gi	Gill	451	1.0681	451	1.412	0.3439	0	0	19.23	13.5		2013-02-18	2013-02-22	4	0	0
E2-13	Diet	Cont.	24	40	4	Gi	Gill	460	1.057	460	1.5522	0.4952	3.4	0	24.07	14.1		2013-02-18	2013-02-22	4	3.43793	6.94251
E2-13	Diet	Cont.	24	41	5	Gi	Gill	469	1.0469	469	1.6177	0.5708	0	0	31.7	15.8		2013-02-18	2013-02-22	4	0	0
E2-13	Diet	Cont.	24	42	6	Gi	Gill	478	1.049	478	1.4753	0.4263	0	0	20.11	13.7		2013-02-18	2013-02-22	4	0	0
E2-13	Diet	S-Ag	24	43	1	Gi	Gill	487	1.0488	487	1.4918	0.443	3.6		18.42	13.8		2013-02-18	2013-02-22	4	3.64016	8.21707	17.3943	26.4019		0.000359672	0.000761374	0.00115565
E2-13	Diet	S-Ag	24	44	2	Gi	Gill	496	1.0563	496	1.4096	0.3533	1.4		17.36	13.4		2013-02-18	2013-02-22	4	1.41562	4.00685				0.000175385
E2-13	Diet	S-Ag	24	45	3	Gi	Gill	505	1.0461	505	1.4149	0.3688	25.9		15.8	12.7		2013-02-18	2013-02-22	4	26.189	71.0113				0.00310826
E2-13	Diet	S-Ag	24	46	4	Gi	Gill	514	1.0465	514	1.5614	0.5149	1.5		28.02	15		2013-02-18	2013-02-22	4	1.51673	2.94569				0.000128937
E2-13	Diet	S-Ag	24	47	5	Gi	Gill	523	1.051	523	1.4836	0.4326	4.1		20.49	13.7		2013-02-18	2013-02-22	4	4.14574	9.58331				0.000419475
E2-13	Diet	S-Ag	24	48	6	Gi	Gill	532	1.0465	532	1.6225	0.576	4.9		30.05	15.2		2013-02-18	2013-02-22	4	4.95467	8.60185				0.000376515
E2-13	Diet	Ag+	24	49	1	Ha	Heart	599	1.0501	599	1.0854	0.0353	0		18.71	13.5		2013-02-18	2013-03-23	33	0	0	1.2524	2.80046
E2-13	Diet	Ag+	24	50	2	Ha	Heart	607	1.0515	607	1.0846	0.0331	0		14.26	12.5		2013-02-18	2013-03-23	33	0	0
E2-13	Diet	Ag+	24	51	3	Ha	Heart	617	1.0505	617	1.0936	0.0431	0		23.87	14.7		2013-02-18	2013-03-23	33	0	0
E2-13	Diet	Ag+	24	52	4	Ha	Heart	626	1.0584	626	1.0941	0.0357	0		19.91	13.5		2013-02-18	2013-03-23	33	0	0
E2-13	Diet	Ag+	24	53	5	Ha	Heart	635	1.0484	635	1.0834	0.035	0.2		15.59	12.7		2013-02-18	2013-03-23	33	0.21917	6.26201
E2-13	Diet	Ag+	24	54	6	Ha	Heart	644	1.0503	644					x	x
E2-13	Diet	C-Ag	24	55	1	Ha	Heart	545	1.0456	545	1.0836	0.038	1.6		24.65	14.5		2013-02-18	2013-03-23	33	1.75336	46.1411	7.69019	18.837
E2-13	Diet	C-Ag	24	56	2	Ha	Heart	554	1.047	554	1.0829	0.0359	0		21.36	13.7		2013-02-18	2013-03-23	33	0	0
E2-13	Diet	C-Ag	24	57	3	Ha	Heart	563	1.0565	563	1.0995	0.043	0		24.33	14.3		2013-02-18	2013-03-23	33	0	0
E2-13	Diet	C-Ag	24	58	4	Ha	Heart	572	1.0505	572	1.1053	0.0548	0		28.9	15.3		2013-02-18	2013-03-23	33	0	0
E2-13	Diet	C-Ag	24	59	5	Ha	Heart	581	1.0519	581	1.0882	0.0363	0		23.31	14.2		2013-02-18	2013-03-23	33	0	0
E2-13	Diet	C-Ag	24	60	6	Ha	Heart	590	1.0451	590	1.079	0.0339	0		17.7	13.1		2013-02-18	2013-03-23	33	0	0
E2-13	Diet	Cont.	24	61	1	Ha	Heart	437	1.0444	437	1.104	0.0596	0		27.93	15.1		2013-02-18	2013-03-23	33	0	0	0	0
E2-13	Diet	Cont.	24	62	2	Ha	Heart	446	1.0503	446	1.1127	0.0624	0		26.26	14.7		2013-02-18	2013-03-23	33	0	0
E2-13	Diet	Cont.	24	63	3	Ha	Heart	455	1.0529	455	1.0955	0.0426	0		19.23	13.5		2013-02-18	2013-03-23	33	0	0
E2-13	Diet	Cont.	24	64	4	Ha	Heart	464	1.0494	464	1.0856	0.0362	0		24.07	14.1		2013-02-18	2013-03-23	33	0	0
E2-13	Diet	Cont.	24	65	5	Ha	Heart	473	1.0523	473	1.109	0.0567	0		31.7	15.8		2013-02-18	2013-03-23	33	0	0
E2-13	Diet	Cont.	24	66	6	Ha	Heart	482	1.0529	482	1.0908	0.0379	0		20.11	13.7		2013-02-18	2013-03-23	33	0	0
E2-13	Diet	S-Ag	24	67	1	Ha	Heart	491	1.0522	491	1.0818	0.0296	0		18.42	13.8		2013-02-18	2013-03-23	33	0	0	7.51871	18.417
E2-13	Diet	S-Ag	24	68	2	Ha	Heart	500	1.0509	500	1.1092	0.0583	2.4		17.36	13.4		2013-02-18	2013-03-23	33	2.63004	45.1123
E2-13	Diet	S-Ag	24	69	3	Ha	Heart	509	1.0518	509	1.0804	0.0286	0		15.8	12.7		2013-02-18	2013-03-23	33	0	0
E2-13	Diet	S-Ag	24	70	4	Ha	Heart	518	1.0583	518	1.1036	0.0453	0		28.02	15		2013-02-18	2013-03-23	33	0	0
E2-13	Diet	S-Ag	24	71	5	Ha	Heart	527	1.0494	527	1.0903	0.0409	0		20.49	13.7		2013-02-18	2013-03-23	33	0	0
E2-13	Diet	S-Ag	24	72	6	Ha	Heart	536	1.0529	536	1.1045	0.0516	0		30.05	15.2		2013-02-18	2013-03-23	33	0	0
E2-13	Diet	Ag+	24	73	1	Int.	Intestines	600	1.0526	600	1.7805	0.7279	403.7		18.71	13.5		2013-02-18	2013-03-08	18	424.367	583.002	840.68	203.701		0.0226611	0.0272308	0.0151035
E2-13	Diet	Ag+	24	74	2	Int.	Intestines	608	1.0511	608	1.6967	0.6456	587.5		14.26	12.5		2013-02-18	2013-03-08	18	617.576	956.593				0.0371825
E2-13	Diet	Ag+	24	75	3	Int.	Intestines	618	1.0497	618	2.1364	1.0867	733.5		23.87	14.7		2013-02-18	2013-03-08	18	771.051	709.534				0.0275794
E2-13	Diet	Ag+	24	76	4	Int.	Intestines	627	1.0511	627	1.9392	0.8881	931.9		19.91	13.5		2013-02-18	2013-03-08	18	979.608	1103.04				0.0428747
E2-13	Diet	Ag+	24	77	5	Int.	Intestines	636	1.055	636	1.8057	0.7507	607.9		15.59	12.7		2013-02-18	2013-03-08	18	639.021	851.233				0.0330872
E2-13	Diet	Ag+	24	78	6	Int.	Intestines	645	1.0521	645					x	x										0
E2-13	Diet	C-Ag	24	79	1	Int.	Intestines	546	1.0471	546	1.9643	0.9172	776.1		24.65	14.5		2013-02-18	2013-03-08	18	815.832	889.481	390.178	338.959		0.0213208	0.00935254	0.00812482
E2-13	Diet	C-Ag	24	80	2	Int.	Intestines	555	1.052	555	1.8061	0.7541	445.2		21.36	13.7		2013-02-18	2013-03-08	18	467.992	620.596				0.0148756
E2-13	Diet	C-Ag	24	81	3	Int.	Intestines	564	1.051	564	2.0956	1.0446	387		24.33	14.3		2013-02-18	2013-03-08	18	406.812	389.443				0.0093349
E2-13	Diet	C-Ag	24	82	4	Int.	Intestines	573	1.0673	573	2.2628	1.1955	453.4		28.9	15.3		2013-02-18	2013-03-08	18	476.611	398.671				0.0095561
E2-13	Diet	C-Ag	24	83	5	Int.	Intestines	582	1.058	582	1.9588	0.9008	23.2		23.31	14.2		2013-02-18	2013-03-08	18	24.3877	27.0734				0.000648946
E2-13	Diet	C-Ag	24	84	6	Int.	Intestines	591	1.0583	591	1.8896	0.8313	12.5		17.7	13.1		2013-02-18	2013-03-08	18	13.1399	15.8065				0.00037888
E2-13	Diet	Cont.	24	85	1	Int.	Intestines	438	1.0596	438	2.7012	1.6416	8.3		27.93	15.1		2013-02-18	2013-03-08	18	8.72491	5.31488	5.98264	2.30466
E2-13	Diet	Cont.	24	86	2	Int.	Intestines	447	1.0529	447	2.183	1.1301	2.9		26.26	14.7		2013-02-18	2013-03-08	18	3.04846	2.69752
E2-13	Diet	Cont.	24	87	3	Int.	Intestines	456	1.0506	456	1.841	0.7904	5.4		19.23	13.5		2013-02-18	2013-03-08	18	5.67645	7.18174
E2-13	Diet	Cont.	24	88	4	Int.	Intestines	465	1.05	465	2.1852	1.1352	6.8		24.07	14.1		2013-02-18	2013-03-08	18	7.14812	6.29679
E2-13	Diet	Cont.	24	89	5	Int.	Intestines	474	1.0528	474	2.3889	1.3361	6.2		31.7	15.8		2013-02-18	2013-03-08	18	6.5174	4.87793
E2-13	Diet	Cont.	24	90	6	Int.	Intestines	483	1.0538	483	1.771	0.7172	6.5		20.11	13.7		2013-02-18	2013-03-08	18	6.83276	9.52699
E2-13	Diet	S-Ag	24	91	1	Int.	Intestines	492	1.0582	492	1.7932	0.735	680.2		18.42	13.8		2013-02-18	2013-03-08	18	715.022	972.819	1163.78	417.991		0.0425816	0.0509401	0.018296
E2-13	Diet	S-Ag	24	92	2	Int.	Intestines	501	1.0512	501	1.6859	0.6347	883.9		17.36	13.4		2013-02-18	2013-03-08	18	929.15	1463.92				0.0640778
E2-13	Diet	S-Ag	24	93	3	Int.	Intestines	510	1.051	510	1.7563	0.7053	1057.5		15.8	12.7		2013-02-18	2013-03-08	18	1111.64	1576.12				0.0689889
E2-13	Diet	S-Ag	24	94	4	Int.	Intestines	519	1.0498	519	2.1481	1.0983	1121.9		28.02	15		2013-02-18	2013-03-08	18	1179.33	1073.78				0.0470009
E2-13	Diet	S-Ag	24	95	5	Int.	Intestines	528	1.051	528	2.0518	1.0008	438.2		20.49	13.7		2013-02-18	2013-03-08	18	460.633	460.265				0.0201464
E2-13	Diet	S-Ag	24	96	6	Int.	Intestines	537	1.0683	537	2.3172	1.2489	1705.8		30.05	15.2		2013-02-18	2013-03-08	18	1793.13	1435.76				0.0628453
E2-13	Diet	Ag+	24	1	1	Ki	Kidney	597	1.0449	597	1.2135	0.1686	0.3		18.71	13.5		2013-02-18	2013-02-21	3	0.302507	1.79423	10.0762	8.63402		6.9741e-05	0.000326382	0.000340101
E2-13	Diet	Ag+	24	2	2	Ki	Kidney	612	1.0455	612	1.148	0.1025	0		14.26	12.5		2013-02-18	2013-02-21	3	0	0				0
E2-13	Diet	Ag+	24	3	3	Ki	Kidney	615	1.0534	615	1.2375	0.1841	2.4		23.87	14.7		2013-02-18	2013-02-21	3	2.42005	13.1453				0.000510954
E2-13	Diet	Ag+	24	4	4	Ki	Kidney	624	1.0499	624	1.1821	0.1322	2.2		19.91	13.5		2013-02-18	2013-02-21	3	2.21838	16.7805				0.000652253
E2-13	Diet	Ag+	24	5	5	Ki	Kidney	633	1.0483	633	1.1996	0.1513	2.8		15.59	12.7		2013-02-18	2013-02-21	3	2.8234	18.6609				0.000725344
E2-13	Diet	Ag+	24	6	6	Ki	Kidney	642	1.0488	642					x	x										0
E2-13	Diet	C-Ag	24	7	1	Ki	Kidney	543	1.0476	543	1.2463	0.1987	3.9		24.65	14.5		2013-02-18	2013-02-21	3	3.93259	19.7916	8.74023	11.8197		0.000769292	0.00033973	0.000459426
E2-13	Diet	C-Ag	24	8	2	Ki	Kidney	552	1.0455	552	1.1522	0.1067	2.9		21.36	13.7		2013-02-18	2013-02-21	3	2.92423	27.4061				0.00106527
E2-13	Diet	C-Ag	24	9	3	Ki	Kidney	561	1.0533	561	1.2289	0.1756	0		24.33	14.3		2013-02-18	2013-02-21	3	0	0				0
E2-13	Diet	C-Ag	24	10	4	Ki	Kidney	570	1.0455	570	1.2725	0.227	0.5		28.9	15.3		2013-02-18	2013-02-21	3	0.504178	2.22105				8.63314e-05
E2-13	Diet	C-Ag	24	11	5	Ki	Kidney	579	1.0508	579	1.2176	0.1668	0.5		23.31	14.2		2013-02-18	2013-02-21	3	0.504178	3.02265				0.000117489
E2-13	Diet	C-Ag	24	12	6	Ki	Kidney	588	1.0486	588	1.1975	0.1489	0		17.7	13.1		2013-02-18	2013-02-21	3	0	0				0
E2-13	Diet	Cont.	24	13	1	Ki	Kidney	435	1.0492	435	1.2613	0.2121	0	0	27.93	15.1		2013-02-18	2013-02-21	3	0	0	0	0
E2-13	Diet	Cont.	24	14	2	Ki	Kidney	444	1.0508	444	1.2222	0.1714	0	0	26.26	14.7		2013-02-18	2013-02-21	3	0	0
E2-13	Diet	Cont.	24	15	3	Ki	Kidney	453	1.0478	453	1.1356	0.0878	0	0	19.23	13.5		2013-02-18	2013-02-21	3	0	0
E2-13	Diet	Cont.	24	16	4	Ki	Kidney	462	1.0517	462	1.2198	0.1681	0	0	24.07	14.1		2013-02-18	2013-02-21	3	0	0
E2-13	Diet	Cont.	24	17	5	Ki	Kidney	471	1.0511	471	1.2548	0.2037	0	0	31.7	15.8		2013-02-18	2013-02-21	3	0	0
E2-13	Diet	Cont.	24	18	6	Ki	Kidney	480	1.0533	480	1.1821	0.1288	0	0	20.11	13.7		2013-02-18	2013-02-21	3	0	0
E2-13	Diet	S-Ag	24	19	1	Ki	Kidney	489	1.0505	489	1.2016	0.1511	1		18.42	13.8		2013-02-18	2013-02-21	3	1.00836	6.67343	9.46398	11.1891		0.000292105	0.000414251	0.000489761
E2-13	Diet	S-Ag	24	20	2	Ki	Kidney	498	1.0517	498	1.1665	0.1148	3.6		17.36	13.4		2013-02-18	2013-02-21	3	3.63008	31.6209				0.00138409
E2-13	Diet	S-Ag	24	21	3	Ki	Kidney	507	1.0501	507	1.1965	0.1464	0.8		15.8	12.7		2013-02-18	2013-02-21	3	0.806685	5.51014				0.000241186
E2-13	Diet	S-Ag	24	22	4	Ki	Kidney	516	1.0556	516	1.2568	0.2012	1		28.02	15		2013-02-18	2013-02-21	3	1.00836	5.01171				0.000219369
E2-13	Diet	S-Ag	24	23	5	Ki	Kidney	525	1.0532	525	1.2042	0.151	0		20.49	13.7		2013-02-18	2013-02-21	3	0	0				0
E2-13	Diet	S-Ag	24	24	6	Ki	Kidney	534	1.0521	534	1.2799	0.2278	1.8		30.05	15.2		2013-02-18	2013-02-21	3	1.81504	7.96769				0.000348757
E2-13	Diet	Ag+	24	25	1	Li	Liver	596	1.0467	596	1.3016	0.2549	60.7		18.71	13.5		2013-02-18	2013-03-06	16	63.4545	248.939	292.087	73.1199		0.00967617	0.00946111	0.00528633	0.946111	0.528633	x10-2
E2-13	Diet	Ag+	24	26	2	Li	Liver	605	1.0524	605	1.2512	0.1988	72.3		14.26	12.5		2013-02-18	2013-03-06	16	75.5809	380.185				0.0147777
E2-13	Diet	Ag+	24	27	3	Li	Liver	614	1.0599	614	1.3071	0.2472	80.5		23.87	14.7		2013-02-18	2013-03-06	16	84.153	340.425				0.0132322
E2-13	Diet	Ag+	24	28	4	Li	Liver	623	1.0632	623	1.3293	0.2661	75.3		19.91	13.5		2013-02-18	2013-03-06	16	78.717	295.817				0.0114983
E2-13	Diet	Ag+	24	29	5	Li	Liver	632	1.053	632	1.3381	0.2851	53.2		15.59	12.7		2013-02-18	2013-03-06	16	55.6141	195.069				0.00758226
E2-13	Diet	Ag+	24	30	6	Li	Liver	641	1.0522	641					x	x										0
E2-13	Diet	C-Ag	24	31	1	Li	Liver	542	1.0518	542	1.3483	0.2965	5.4		24.65	14.5		2013-02-18	2013-03-06	16	5.64504	19.0389	35.8466	30.3289		0.000456361	0.000859238	0.000726982
E2-13	Diet	C-Ag	24	32	2	Li	Liver	551	1.0472	551	1.2574	0.2102	3.1		21.36	13.7		2013-02-18	2013-03-06	16	3.24067	15.4171				0.000369546
E2-13	Diet	C-Ag	24	33	3	Li	Liver	560	1.0536	560	1.3492	0.2956	16		24.33	14.3		2013-02-18	2013-03-06	16	16.7261	56.5834				0.0013563
E2-13	Diet	C-Ag	24	34	4	Li	Liver	569	1.0491	569	1.3636	0.3145	25.9		28.9	15.3		2013-02-18	2013-03-06	16	27.0753	86.09				0.00206357
E2-13	Diet	C-Ag	24	35	5	Li	Liver	578	1.052	578	1.3335	0.2815	8.8		23.31	14.2		2013-02-18	2013-03-06	16	9.19933	32.6797				0.000783329
E2-13	Diet	C-Ag	24	36	6	Li	Liver	587	1.0475	587	1.3252	0.2777	1.4		17.7	13.1		2013-02-18	2013-03-06	16	1.46353	5.27018				0.000126326
E2-13	Diet	Cont.	24	37	1	Li	Liver	434	1.044	434	1.3941	0.3501	2.3		27.93	15.1		2013-02-18	2013-03-06	16	2.40437	6.86767	8.75933	6.36422
E2-13	Diet	Cont.	24	38	2	Li	Liver	443	1.0503	443	1.4635	0.4132	2.8		26.26	14.7		2013-02-18	2013-03-06	16	2.92706	7.08388
E2-13	Diet	Cont.	24	39	3	Li	Liver	452	1.0521	452	1.2625	0.2104	3.9		19.23	13.5		2013-02-18	2013-03-06	16	4.07698	19.3773
E2-13	Diet	Cont.	24	40	4	Li	Liver	461	1.0535	461	1.3794	0.3259	3.5		24.07	14.1		2013-02-18	2013-03-06	16	3.65883	11.2268
E2-13	Diet	Cont.	24	41	5	Li	Liver	470	1.0504	470	1.364	0.3136	2.4		31.7	15.8		2013-02-18	2013-03-06	16	2.50891	8.00035
E2-13	Diet	Cont.	24	42	6	Li	Liver	479	1.0536	479	1.2958	0.2422	0		20.11	13.7		2013-02-18	2013-03-06	16	0	0
E2-13	Diet	S-Ag	24	43	1	Li	Liver	488	1.0514	488	1.2816	0.2302	38.5		18.42	13.8		2013-02-18	2013-03-06	16	40.2471	174.835	448.268	189.007		0.00765277	0.0196213	0.00827307	1.96213	0.827307	x10-2
E2-13	Diet	S-Ag	24	44	2	Li	Liver	497	1.0682	497	1.2942	0.226	143.8		17.36	13.4		2013-02-18	2013-03-06	16	150.325	665.157				0.0291148
E2-13	Diet	S-Ag	24	45	3	Li	Liver	506	1.0507	506	1.2694	0.2187	132		15.8	12.7		2013-02-18	2013-03-06	16	137.99	630.956				0.0276178
E2-13	Diet	S-Ag	24	46	4	Li	Liver	515	1.0592	515	1.4595	0.4003	174		28.02	15		2013-02-18	2013-03-06	16	181.896	454.399				0.0198896
E2-13	Diet	S-Ag	24	47	5	Li	Liver	524	1.0518	524	1.2894	0.2376	67.4		20.49	13.7		2013-02-18	2013-03-06	16	70.4585	296.543				0.0129801
E2-13	Diet	S-Ag	24	48	6	Li	Liver	533	1.0524	533	1.389	0.3366	150.6		30.05	15.2		2013-02-18	2013-03-06	16	157.434	467.718				0.0204727
E2-13	Diet	Ag+	24	49	1	Mi	Spleen	603	1.0492	603	1.069	0.0198	3.8		18.71	13.5		2013-02-18	2013-03-22	32	4.1527	209.732	69.0067	98.0873		0.00815223
E2-13	Diet	Ag+	24	50	2	Mi	Spleen	611	1.0512	611	1.0651	0.0139	0		14.26	12.5		2013-02-18	2013-03-22	32	0	0				0
E2-13	Diet	Ag+	24	51	3	Mi	Spleen	621	1.0537	621	1.077	0.0233	0		23.87	14.7		2013-02-18	2013-03-22	32	0	0				0
E2-13	Diet	Ag+	24	52	4	Mi	Spleen	630	1.0513	630	1.0723	0.021	2.6		19.91	13.5		2013-02-18	2013-03-22	32	2.84132	135.301				0.00525911
E2-13	Diet	Ag+	24	53	5	Mi	Spleen	639	1.0569	639	1.0755	0.0186	0		15.59	12.7		2013-02-18	2013-03-22	32	0	0				0
E2-13	Diet	Ag+	24	54	6	Mi	Spleen	648	1.0518	648					x	x										0
E2-13	Diet	C-Ag	24	55	1	Mi	Spleen	549	1.0475	549	1.0828	0.0353	0.2		24.65	14.5		2013-02-18	2013-03-22	32	0.218563	6.1916	15.6563	25.6083		0.000148412
E2-13	Diet	C-Ag	24	56	2	Mi	Spleen	558	1.0501	558	1.0687	0.0186	1.1		21.36	13.7		2013-02-18	2013-03-22	32	1.2021	64.6289				0.00154915
E2-13	Diet	C-Ag	24	57	3	Mi	Spleen	567	1.0459	567	1.0979	0.052	1.1		24.33	14.3		2013-02-18	2013-03-22	32	1.2021	23.1173				0.000554119
E2-13	Diet	C-Ag	24	58	4	Mi	Spleen	576	1.0619	576	1.0865	0.0246	0		28.9	15.3		2013-02-18	2013-03-22	32	0	0				0
E2-13	Diet	C-Ag	24	59	5	Mi	Spleen	585	1.0502	585	1.08	0.0298	0		23.31	14.2		2013-02-18	2013-03-22	32	0	0				0
E2-13	Diet	C-Ag	24	60	6	Mi	Spleen	594	1.0569	594	1.0761	0.0192	0		17.7	13.1		2013-02-18	2013-03-22	32	0	0				0
E2-13	Diet	Cont.	24	61	1	Mi	Spleen	441	1.0579	441	1.1128	0.0549	0		27.93	15.1		2013-02-18	2013-03-22	32	0	0	14.0351	19.1202
E2-13	Diet	Cont.	24	62	2	Mi	Spleen	450	1.0539	450	1.1156	0.0617	0		26.26	14.7		2013-02-18	2013-03-22	32	0	0
E2-13	Diet	Cont.	24	63	3	Mi	Spleen	459	1.0533	459	1.0798	0.0265	0.5		19.23	13.5		2013-02-18	2013-03-22	32	0.546408	20.6192
E2-13	Diet	Cont.	24	64	4	Mi	Spleen	468	1.0525	468	1.0795	0.027	1.2		24.07	14.1		2013-02-18	2013-03-22	32	1.31138	48.5696
E2-13	Diet	Cont.	24	65	5	Mi	Spleen	477	1.0499	477	1.079	0.0291	0.4		31.7	15.8		2013-02-18	2013-03-22	32	0.437127	15.0215
E2-13	Diet	Cont.	24	66	6	Mi	Spleen	486	1.0505	486	1.0723	0.0218	0		20.11	13.7		2013-02-18	2013-03-22	32	0	0
E2-13	Diet	S-Ag	24	67	1	Mi	Spleen	495	1.0519	495	1.0811	0.0292	0		18.42	13.8		2013-02-18	2013-03-22	32	0	0	0	0		0
E2-13	Diet	S-Ag	24	68	2	Mi	Spleen	504	1.0504	504	1.0672	0.0168	0		17.36	13.4		2013-02-18	2013-03-22	32	0	0				0
E2-13	Diet	S-Ag	24	69	3	Mi	Spleen	513	1.056	513	1.0772	0.0212	0		15.8	12.7		2013-02-18	2013-03-22	32	0	0				0
E2-13	Diet	S-Ag	24	70	4	Mi	Spleen	522	1.0525	522	1.0914	0.0389	0		28.02	15		2013-02-18	2013-03-22	32	0	0				0
E2-13	Diet	S-Ag	24	71	5	Mi	Spleen	531	1.0483	531	1.0696	0.0213	0		20.49	13.7		2013-02-18	2013-03-22	32	0	0				0
E2-13	Diet	S-Ag	24	72	6	Mi	Spleen	540	1.0513	540	1.1201	0.0688	0		30.05	15.2		2013-02-18	2013-03-22	32	0	0				0
E2-13	Diet	Ag+	48	73	1	Bi	Bile	814	1.0549	814	1.1111	0.0562	11.8		12.91	12		2013-02-18	2013-03-08	18	12.4041	220.713	318.545	317.86		0.00857905	0.0123818	0.0123551	1.23818	1.23551	x10-2
E2-13	Diet	Ag+	48	74	2	Bi	Bile	823	1.042	823	1.1395	0.0975	1.3		23.31	14.3		2013-02-18	2013-03-08	18	1.36655	14.0159				0.000544794
E2-13	Diet	Ag+	48	75	3	Bi	Bile	832	1.0367	832	1.0689	0.0322	28.5		20.72	13.6		2013-02-18	2013-03-08	18	29.959	930.405				0.0361645
E2-13	Diet	Ag+	48	76	4	Bi	Bile	841	1.0443	841	1.0982	0.0539	10.6		19.07	13.5		2013-02-18	2013-03-08	18	11.1427	206.728				0.00803546
E2-13	Diet	Ag+	48	77	5	Bi	Bile	850	1.0534	850	1.1079	0.0545	10.1		19.66	13.7		2013-02-18	2013-03-08	18	10.6171	194.808				0.00757214
E2-13	Diet	Ag+	48	78	6	Bi	Bile	859	1.052	859	1.1185	0.0665	21.8		15.54	12.9		2013-02-18	2013-03-08	18	22.916	344.602				0.0133946
E2-13	Diet	C-Ag	48	79	1	Bi	Bile	760	1.0431	760	1.1048	0.0617	0.9		24.26	14.7		2013-02-18	2013-03-08	18	0.946075	15.3335	14.8866	20.7619		0.000367541	0.00035683	0.00049766	3.5683	4.9766	x10-4
E2-13	Diet	C-Ag	48	80	2	Bi	Bile	769	1.0543	769	1.1334	0.0791	4.2		28.06	15.2		2013-02-18	2013-03-08	18	4.41501	55.8156				0.00133789
E2-13	Diet	C-Ag	48	81	3	Bi	Bile	778	1.0427	778	1.1792	0.1365	0.3		25.92	14.7		2013-02-18	2013-03-08	18	0.315358	2.31032				5.5378e-05
E2-13	Diet	C-Ag	48	82	4	Bi	Bile	787	1.0562	787	1.0911	0.0349	0		13.49	12.2		2013-02-18	2013-03-08	18	0	0				0
E2-13	Diet	C-Ag	48	83	5	Bi	Bile	796	1.054	796	1.1015	0.0475	0.3		13.64	12.2		2013-02-18	2013-03-08	18	0.315358	6.63912				0.000159139
E2-13	Diet	C-Ag	48	84	6	Bi	Bile	805	1.0503	805	1.1187	0.0684	0.6		26.18	14.8		2013-02-18	2013-03-08	18	0.630716	9.221				0.000221026
E2-13	Diet	Cont.	48	85	1	Bi	Bile	652	1.0457	652	1.1148	0.0691	0	0	16.48	12.9		2013-02-18	2013-03-08	18	0	0	7.17538	17.576
E2-13	Diet	Cont.	48	86	2	Bi	Bile	661	1.0586	661	1.1295	0.0709	0	0	19.63	13.5		2013-02-18	2013-03-08	18	0	0
E2-13	Diet	Cont.	48	87	3	Bi	Bile	670	1.041	670	1.1034	0.0624	0	0	18.75	13.2		2013-02-18	2013-03-08	18	0	0
E2-13	Diet	Cont.	48	88	4	Bi	Bile	679	1.053	679	1.1116	0.0586	2.4	0	24.55	14.4		2013-02-18	2013-03-08	18	2.52287	43.0523
E2-13	Diet	Cont.	48	89	5	Bi	Bile	688	1.0443	688	1.0885	0.0442	0	0	20.95	13.6		2013-02-18	2013-03-08	18	0	0
E2-13	Diet	Cont.	48	90	6	Bi	Bile	697	1.0485	697	1.1159	0.0674	0	0	15.08	12.3		2013-02-18	2013-03-08	18	0	0
E2-13	Diet	S-Ag	48	91	1	Bi	Bile	706	1.0526	706	1.111	0.0584	25.9		23.68	14.6		2013-02-18	2013-03-08	18	27.2259	466.197	294.527	210.202		0.0204061	0.0107432	0.00976854	1.07432	0.976854	x10-2
E2-13	Diet	S-Ag	48	92	2	Bi	Bile	715	1.0587	715	1.0951	0.0364	19.7		13.21	12		2013-02-18	2013-03-08	18	20.7085	568.915				0.0249022
E2-13	Diet	S-Ag	48	93	3	Bi	Bile	724	1.0476	724	1.0996	0.052	7.3		25.2	14.5		2013-02-18	2013-03-08	18	7.67372	147.571				0.0064594
E2-13	Diet	S-Ag	48	94	4	Bi	Bile	733	1.0398	733					26.66	14.9										0
E2-13	Diet	S-Ag	48	95	5	Bi	Bile	742	1.0589	742	1.1719	0.113	21.3		24.65	14.8		2013-02-18	2013-03-08	18	22.3904	198.145				0.00867309
E2-13	Diet	S-Ag	48	96	6	Bi	Bile	751	1.0593	751	1.1509	0.0916	8		28.58	15.4		2013-02-18	2013-03-08	18	8.40955	91.8073				0.00401853
E2-13	Diet	Ag+	48	1	1	Br	Brain	817	1.0542	817	1.12	0.0658	0		12.91	12		2013-02-18			0	0	4.92406	7.78089
E2-13	Diet	Ag+	48	2	2	Br	Brain	826	1.0533	826	1.1748	0.1215	0		23.31	14.3		2013-02-18			0	0
E2-13	Diet	Ag+	48	3	3	Br	Brain	835	1.0571	835	1.1541	0.097	1.9		20.72	13.6		2013-02-18			1.9	19.5876
E2-13	Diet	Ag+	48	4	4	Br	Brain	844	1.0504	844	1.1395	0.0891	0.2		19.07	13.5		2013-02-18			0.2	2.24467
E2-13	Diet	Ag+	48	5	5	Br	Brain	853	1.0406	853	1.146	0.1054	0		19.66	13.7		2013-02-18			0	0
E2-13	Diet	Ag+	48	6	6	Br	Brain	862	1.0468	862	1.1246	0.0778	0.6		15.54	12.9		2013-02-18			0.6	7.71208
E2-13	Diet	C-Ag	48	7	1	Br	Brain	763	1.0553	763	1.1427	0.0874	1.6		24.26	14.7		2013-02-18			1.6	18.3066	7.26315	7.149
E2-13	Diet	C-Ag	48	8	2	Br	Brain	772	1.0521	772	1.1676	0.1155	0		28.06	15.2		2013-02-18			0	0
E2-13	Diet	C-Ag	48	9	3	Br	Brain	781	1.0559	781	1.1468	0.0909	0.7		25.92	14.7		2013-02-18			0.7	7.70077
E2-13	Diet	C-Ag	48	10	4	Br	Brain	790	1.0572	790	1.1316	0.0744	0.4		13.49	12.2		2013-02-18			0.4	5.37634
E2-13	Diet	C-Ag	48	11	5	Br	Brain	799	1.0527	799	1.1593	0.1066	1.3		13.64	12.2		2013-02-18			1.3	12.1951
E2-13	Diet	C-Ag	48	12	6	Br	Brain	808	1.0503	808	1.1751	0.1248	0		26.18	14.8		2013-02-18			0	0
E2-13	Diet	Cont.	48	13	1	Br	Brain	655	1.0484	655	1.1152	0.0668	0		16.48	12.9		2013-02-18			0	0	1.94222	4.75745
E2-13	Diet	Cont.	48	14	2	Br	Brain	664	1.0557	664	1.1739	0.1182	0		19.63	13.5		2013-02-18			0	0
E2-13	Diet	Cont.	48	15	3	Br	Brain	673	1.0566	673	1.1462	0.0896	0		18.75	13.2		2013-02-18			0	0
E2-13	Diet	Cont.	48	16	4	Br	Brain	682	1.0482	682	1.1855	0.1373	1.6		24.55	14.4		2013-02-18			1.6	11.6533
E2-13	Diet	Cont.	48	17	5	Br	Brain	691	1.0413	691	1.1509	0.1096	0		20.95	13.6		2013-02-18			0	0
E2-13	Diet	Cont.	48	18	6	Br	Brain	700	1.0569	700	1.1479	0.091	0		15.08	12.3		2013-02-18			0	0
E2-13	Diet	S-Ag	48	19	1	Br	Brain	710	1.0486	710	1.1445	0.0959	1.9		23.68	14.6		2013-02-18			1.9	19.8123	3.71142	7.91656
E2-13	Diet	S-Ag	48	20	2	Br	Brain	718	1.0521	718	1.1426	0.0905	0		13.21	12		2013-02-18			0	0
E2-13	Diet	S-Ag	48	21	3	Br	Brain	727	1.0459	727	1.0978	0.0519	0		25.2	14.5		2013-02-18			0	0
E2-13	Diet	S-Ag	48	22	4	Br	Brain	736	1.0589	736	1.1928	0.1339	0.1		26.66	14.9		2013-02-18			0.1	0.746826
E2-13	Diet	S-Ag	48	23	5	Br	Brain	745	1.0567	745	1.1737	0.117	0.2		24.65	14.8		2013-02-18			0.2	1.7094
E2-13	Diet	S-Ag	48	24	6	Br	Brain	754	1.0553	754	1.2259	0.1706	0		28.58	15.4		2013-02-18			0	0
E2-13	Diet	Ag+	48	25	1	GC	Gut content	955	1.046	955	1.0867	0.0407	439.9		12.91	12		2013-02-18	2013-02-22	4	444.808	10928.9	21647.8	14516.6
E2-13	Diet	Ag+	48	26	2	GC	Gut content	956	1.0481	956	1.1158	0.0677	19.5		23.31	14.3		2013-02-18	2013-02-22	4	19.7176	291.249
E2-13	Diet	Ag+	48	27	3	GC	Gut content	957	1.0518	957	1.1157	0.0639	2682.6		20.72	13.6		2013-02-18	2013-02-22	4	2712.53	42449.6
E2-13	Diet	Ag+	48	28	4	GC	Gut content	958	1.0489	958	1.145	0.0961	2401.9		19.07	13.5		2013-02-18	2013-02-22	4	2428.7	25272.6
E2-13	Diet	Ag+	48	29	5	GC	Gut content	959	1.0563	959	1.0926	0.0363	984.2		19.66	13.7		2013-02-18	2013-02-22	4	995.18	27415.4
E2-13	Diet	Ag+	48	30	6	GC	Gut content	960	1.0543	960	1.1241	0.0698	1624.2		15.54	12.9		2013-02-18	2013-02-22	4	1642.32	23528.9
E2-13	Diet	C-Ag	48	31	1	GC	Gut content	949	1.0597	949	1.1857	0.126	5528.4		24.26	14.7		2013-02-18	2013-02-22	4	5590.08	44365.7	48140.9	21940.1
E2-13	Diet	C-Ag	48	32	2	GC	Gut content	950	1.0593	950	1.1231	0.0638	3247.4		28.06	15.2		2013-02-18	2013-02-22	4	3283.63	51467.6
E2-13	Diet	C-Ag	48	33	3	GC	Gut content	951	1.044	951	1.1137	0.0697	1256.8		25.92	14.7		2013-02-18	2013-02-22	4	1270.82	18232.7
E2-13	Diet	C-Ag	48	34	4	GC	Gut content	952	1.0496	952	1.0701	0.0205	664.9		13.49	12.2		2013-02-18	2013-02-22	4	672.318	32796
E2-13	Diet	C-Ag	48	35	5	GC	Gut content	953	1.0573	953	1.1103	0.053	4254.6		13.64	12.2		2013-02-18	2013-02-22	4	4302.07	81171.1
E2-13	Diet	C-Ag	48	36	6	GC	Gut content	954	1.0495	954	1.1251	0.0756	4546.7		26.18	14.8		2013-02-18	2013-02-22	4	4597.43	60812.5
E2-13	Diet	Cont.	48	37	1	GC	Gut content	937	1.0525	937	1.1528	0.1003	13.4		16.48	12.9		2013-02-18	2013-02-22	4	13.5495	135.09	167.524	50.1799
E2-13	Diet	Cont.	48	38	2	GC	Gut content	938	1.0486	938	1.1226	0.074	16.3		19.63	13.5		2013-02-18	2013-02-22	4	16.4819	222.728
E2-13	Diet	Cont.	48	39	3	GC	Gut content	939	1.0471	939	1.1581	0.111	14.7		18.75	13.2		2013-02-18	2013-02-22	4	14.864	133.91
E2-13	Diet	Cont.	48	40	4	GC	Gut content	940	1.0479	940	1.125	0.0771	11		24.55	14.4		2013-02-18	2013-02-22	4	11.1227	144.264
E2-13	Diet	Cont.	48	41	5	GC	Gut content	941	1.0543	941	1.1627	0.1084	13.8		20.95	13.6		2013-02-18	2013-02-22	4	13.954	128.727
E2-13	Diet	Cont.	48	42	6	GC	Gut content	942	1.049	942	1.1226	0.0736	17.5		15.08	12.3		2013-02-18	2013-02-22	4	17.6952	240.424
E2-13	Diet	S-Ag	48	43	1	GC	Gut content	943	1.0487	943	1.1795	0.1308	2020.7		23.68	14.6		2013-02-18	2013-02-22	4	2043.24	15621.1	18660.1	5034.96
E2-13	Diet	S-Ag	48	44	2	GC	Gut content	944	1.0535	944	1.1154	0.0619	1316.9		13.21	12		2013-02-18	2013-02-22	4	1331.59	21512
E2-13	Diet	S-Ag	48	45	3	GC	Gut content	945	1.0541	945	1.2179	0.1638	2302.3		25.2	14.5		2013-02-18	2013-02-22	4	2327.99	14212.4
E2-13	Diet	S-Ag	48	46	4	GC	Gut content	946	1.0529	946	1.1701	0.1172	2997.2		26.66	14.9		2013-02-18	2013-02-22	4	3030.64	25858.7
E2-13	Diet	S-Ag	48	47	5	GC	Gut content	947	1.0469	947	1.1505	0.1036	1355		24.65	14.8		2013-02-18	2013-02-22	4	1370.12	13225.1
E2-13	Diet	S-Ag	48	48	6	GC	Gut content	948	1.0485	948	1.2136	0.1651	3515.6		28.58	15.4		2013-02-18	2013-02-22	4	3554.82	21531.3
E2-13	Diet	Ag+	48	49	1	Gi	Gill	811	1.0404	811	1.3219	0.2815	6.8		12.91	12		2013-02-18	2013-02-22	4	6.87586	24.4258	24.1152	26.233		0.000949423	0.000937351	0.00101967	9.37351	10.1967	x10-4
E2-13	Diet	Ag+	48	50	2	Gi	Gill	820	1.0441	820	1.5159	0.4718	0		23.31	14.3		2013-02-18	2013-02-22	4	0	0				0
E2-13	Diet	Ag+	48	51	3	Gi	Gill	829	1.0473	829	1.3775	0.3302	4.2		20.72	13.6		2013-02-18	2013-02-22	4	4.24686	12.8615				0.000499921
E2-13	Diet	Ag+	48	52	4	Gi	Gill	838	1.0513	838	1.44	0.3887	0		19.07	13.5		2013-02-18	2013-02-22	4	0	0				0
E2-13	Diet	Ag+	48	53	5	Gi	Gill	847	1.0539	847	1.5396	0.4857	19		19.66	13.7		2013-02-18	2013-02-22	4	19.212	39.5552				0.0015375
E2-13	Diet	Ag+	48	54	6	Gi	Gill	856	1.0456	856	1.3839	0.3383	22.7		15.54	12.9		2013-02-18	2013-02-22	4	22.9533	67.8488				0.00263726
E2-13	Diet	C-Ag	48	55	1	Gi	Gill	757	1.0465	757	1.5283	0.4818	0.6		24.26	14.7		2013-02-18	2013-02-22	4	0.606694	1.25922	3.71799	4.07377		3.01835e-05	8.91198e-05	9.76479e-05	0.891198	0.976479	x10-4
E2-13	Diet	C-Ag	48	56	2	Gi	Gill	766	1.0508	766	1.6155	0.5647	0		28.06	15.2		2013-02-18	2013-02-22	4	0	0				0
E2-13	Diet	C-Ag	48	57	3	Gi	Gill	775	1.039	775	1.4641	0.4251	1.7		25.92	14.7		2013-02-18	2013-02-22	4	1.71897	4.04367				9.69265e-05
E2-13	Diet	C-Ag	48	58	4	Gi	Gill	784	1.0526	784	1.3335	0.2809	2		13.49	12.2		2013-02-18	2013-02-22	4	2.02231	7.19941				0.000172569
E2-13	Diet	C-Ag	48	59	5	Gi	Gill	793	1.0402	793	1.3581	0.3179	0		13.64	12.2		2013-02-18	2013-02-22	4	0	0				0
E2-13	Diet	C-Ag	48	60	6	Gi	Gill	802	1.0457	802	1.5613	0.5156	5		26.18	14.8		2013-02-18	2013-02-22	4	5.05578	9.80563				0.00023504
E2-13	Diet	Cont.	48	61	1	Gi	Gill	649	1.0481	649	1.3771	0.329	2.6	0	16.48	12.9		2013-02-18	2013-02-22	4	2.62901	7.9909	3.72196	3.4413
E2-13	Diet	Cont.	48	62	2	Gi	Gill	658	1.0438	658	1.4619	0.4181	2.7	0	19.63	13.5		2013-02-18	2013-02-22	4	2.73012	6.52983
E2-13	Diet	Cont.	48	63	3	Gi	Gill	667	1.057	667	1.436	0.379	0	0	18.75	13.2		2013-02-18	2013-02-22	4	0	0
E2-13	Diet	Cont.	48	64	4	Gi	Gill	676	1.0409	676	1.5132	0.4723	0	0	24.55	14.4		2013-02-18	2013-02-22	4	0	0
E2-13	Diet	Cont.	48	65	5	Gi	Gill	685	1.0534	685	1.4538	0.4004	0.9	0	20.95	13.6		2013-02-18	2013-02-22	4	0.910041	2.27283
E2-13	Diet	Cont.	48	66	6	Gi	Gill	694	1.044	694	1.3909	0.3469	1.9	0	15.08	12.3		2013-02-18	2013-02-22	4	1.9212	5.53819
E2-13	Diet	S-Ag	48	67	1	Gi	Gill	703	1.0523	703	1.4558	0.4035	7		23.68	14.6		2013-02-18	2013-02-22	4	7.0781	17.5417	13.1012	9.03338		0.000767826	0.000573458	0.000395403
E2-13	Diet	S-Ag	48	68	2	Gi	Gill	712	1.0401	712	1.3262	0.2861	7.1		13.21	12		2013-02-18	2013-02-22	4	7.17921	25.0934				0.00109837
E2-13	Diet	S-Ag	48	69	3	Gi	Gill	721	1.0602	721	1.4937	0.4335	0.7		25.2	14.5		2013-02-18	2013-02-22	4	0.70781	1.63278				7.14689e-05
E2-13	Diet	S-Ag	48	70	4	Gi	Gill	730	1.0482	730	1.5405	0.4923	4		26.66	14.9		2013-02-18	2013-02-22	4	4.04463	8.21578				0.000359615
E2-13	Diet	S-Ag	48	71	5	Gi	Gill	739	1.0485	739	1.5506	0.5021	9.8		24.65	14.8		2013-02-18	2013-02-22	4	9.90933	19.7358				0.000863861
E2-13	Diet	S-Ag	48	72	6	Gi	Gill	748	1.0558	748	1.594	0.5382	3.4		28.58	15.4		2013-02-18	2013-02-22	4	3.43793	6.38783				0.000279604
E2-13	Diet	Ag+	48	73	1	Ha	Heart	815	1.0533	815	1.0716	0.0183	0		12.91	12		2013-02-18	2013-03-23	33	0	0	0	0
E2-13	Diet	Ag+	48	74	2	Ha	Heart	824	1.0583	824	1.0994	0.0411	0		23.31	14.3		2013-02-18	2013-03-23	33	0	0
E2-13	Diet	Ag+	48	75	3	Ha	Heart	833	1.0534	833	1.0918	0.0384	0		20.72	13.6		2013-02-18	2013-03-23	33	0	0
E2-13	Diet	Ag+	48	76	4	Ha	Heart	842	1.052	842	1.0926	0.0406	0		19.07	13.5		2013-02-18	2013-03-23	33	0	0
E2-13	Diet	Ag+	48	77	5	Ha	Heart	851	1.0537	851	1.0874	0.0337	0		19.66	13.7		2013-02-18	2013-03-23	33	0	0
E2-13	Diet	Ag+	48	78	6	Ha	Heart	860	1.0565	860	1.0794	0.0229	0		15.54	12.9		2013-02-18	2013-03-23	33	0	0
E2-13	Diet	C-Ag	48	79	1	Ha	Heart	761	1.0512	761	1.1069	0.0557	1.7		24.26	14.7		2013-02-18	2013-03-23	33	1.86295	33.4461	5.57435	13.6543
E2-13	Diet	C-Ag	48	80	2	Ha	Heart	770	1.0436	770	1.0991	0.0555	0		28.06	15.2		2013-02-18	2013-03-23	33	0	0
E2-13	Diet	C-Ag	48	81	3	Ha	Heart	779	1.0532	779	1.1009	0.0477	0		25.92	14.7		2013-02-18	2013-03-23	33	0	0
E2-13	Diet	C-Ag	48	82	4	Ha	Heart	788	1.0483	788	1.0785	0.0302	0		13.49	12.2		2013-02-18	2013-03-23	33	0	0
E2-13	Diet	C-Ag	48	83	5	Ha	Heart	797	1.0502	797	1.078	0.0278	0		13.64	12.2		2013-02-18	2013-03-23	33	0	0
E2-13	Diet	C-Ag	48	84	6	Ha	Heart	806	1.058	806	1.1218	0.0638	0		26.18	14.8		2013-02-18	2013-03-23	33	0	0
E2-13	Diet	Cont.	48	85	1	Ha	Heart	653	1.0575	653	1.0846	0.0271	0.9		16.48	12.9		2013-02-18	2013-03-23	33	0.986267	36.3936	26.3339	22.4638
E2-13	Diet	Cont.	48	86	2	Ha	Heart	662	1.047	662	1.078	0.031	0		19.63	13.5		2013-02-18	2013-03-23	33	0	0
E2-13	Diet	Cont.	48	87	3	Ha	Heart	671	1.0396	671	1.0804	0.0408	1.3		18.75	13.2		2013-02-18	2013-03-23	33	1.42461	34.9168
E2-13	Diet	Cont.	48	88	4	Ha	Heart	680	1.0495	680	1.0955	0.046	2.4		24.55	14.4		2013-02-18	2013-03-23	33	2.63004	57.1749
E2-13	Diet	Cont.	48	89	5	Ha	Heart	689	1.0582	689	1.0965	0.0383	0		20.95	13.6		2013-02-18	2013-03-23	33	0	0
E2-13	Diet	Cont.	48	90	6	Ha	Heart	698	1.0464	698	1.0761	0.0297	0.8		15.08	12.3		2013-02-18	2013-03-23	33	0.876682	29.5179
E2-13	Diet	S-Ag	48	91	1	Ha	Heart	707	1.0405	707	1.0872	0.0467	0		23.68	14.6		2013-02-18	2013-03-23	33	0	0	11.1064	19.6563
E2-13	Diet	S-Ag	48	92	2	Ha	Heart	716	1.0577	716	1.0797	0.022	0		13.21	12		2013-02-18	2013-03-23	33	0	0
E2-13	Diet	S-Ag	48	93	3	Ha	Heart	725	1.0571	725	1.1047	0.0476	0		25.2	14.5		2013-02-18	2013-03-23	33	0	0
E2-13	Diet	S-Ag	48	94	4	Ha	Heart	734	1.0542	734	1.1086	0.0544	2.4		26.66	14.9		2013-02-18	2013-03-23	33	2.63004	48.3464
E2-13	Diet	S-Ag	48	95	5	Ha	Heart	743	1.0474	743	1.0949	0.0475	0		24.65	14.8		2013-02-18	2013-03-23	33	0	0
E2-13	Diet	S-Ag	48	96	6	Ha	Heart	752	1.0507	752	1.1166	0.0659	1.1		28.58	15.4		2013-02-18	2013-03-23	33	1.20544	18.2919
E2-13	Diet	Ag+	48	1	1	Int.	Intestines	816	1.051	816	1.5276	0.4766	364.6		12.91	12		2013-02-18	2013-03-08	18	383.265	804.166	1025.27	599.6		0.0312576	0.0398519	0.0233063
E2-13	Diet	Ag+	48	2	2	Int.	Intestines	825	1.0489	825	2.0123	0.9634	1.5		23.31	14.3		2013-02-18	2013-03-08	18	1.57679	1.63669				6.36177e-05
E2-13	Diet	Ag+	48	3	3	Int.	Intestines	834	1.0387	834	1.7552	0.7165	972		20.72	13.6		2013-02-18	2013-03-08	18	1021.76	1426.04				0.0554299
E2-13	Diet	Ag+	48	4	4	Int.	Intestines	843	1.0543	843	1.7206	0.6663	600.7		19.07	13.5		2013-02-18	2013-03-08	18	631.452	947.7				0.0368368
E2-13	Diet	Ag+	48	5	5	Int.	Intestines	852	1.0482	852	1.8026	0.7544	1234.5		19.66	13.7		2013-02-18	2013-03-08	18	1297.7	1720.17				0.0668626
E2-13	Diet	Ag+	48	6	6	Int.	Intestines	861	1.0531	861	1.6423	0.5892	701.7		15.54	12.9		2013-02-18	2013-03-08	18	737.623	1251.91				0.0486612
E2-13	Diet	C-Ag	48	7	1	Int.	Intestines	762	1.0532	762	1.9254	0.8722	310.6		24.26	14.7		2013-02-18	2013-03-08	18	326.501	374.342	224.968	126.506		0.00897293	0.00539246	0.00303233
E2-13	Diet	C-Ag	48	8	2	Int.	Intestines	771	1.0574	771	2.1189	1.0615	193.7		28.06	15.2		2013-02-18	2013-03-08	18	203.616	191.819				0.00459789
E2-13	Diet	C-Ag	48	9	3	Int.	Intestines	780	1.0389	780	2.0423	1.0034	366		25.92	14.7		2013-02-18	2013-03-08	18	384.737	383.433				0.00919086
E2-13	Diet	C-Ag	48	10	4	Int.	Intestines	789	1.0406	789	1.5687	0.5281	36		13.49	12.2		2013-02-18	2013-03-08	18	37.843	71.6587				0.00171765
E2-13	Diet	C-Ag	48	11	5	Int.	Intestines	798	1.0414	798	1.689	0.6476	112.1		13.64	12.2		2013-02-18	2013-03-08	18	117.839	181.962				0.00436162
E2-13	Diet	C-Ag	48	12	6	Int.	Intestines	807	1.048	807	2.1265	1.0785	150.4		26.18	14.8		2013-02-18	2013-03-08	18	158.1	146.592				0.0035138
E2-13	Diet	Cont.	48	13	1	Int.	Intestines	654	1.0571	654	1.785	0.7279	1.2		16.48	12.9		2013-02-18	2013-03-08	18	1.26143	1.73298	2.9319	1.28565
E2-13	Diet	Cont.	48	14	2	Int.	Intestines	663	1.048	663	1.9917	0.9437	1.8		19.63	13.5		2013-02-18	2013-03-08	18	1.89215	2.00503
E2-13	Diet	Cont.	48	15	3	Int.	Intestines	672	1.0444	672	1.7159	0.6715	2.5		18.75	13.2		2013-02-18	2013-03-08	18	2.62798	3.9136
E2-13	Diet	Cont.	48	16	4	Int.	Intestines	681	1.0533	681	2.0865	1.0332	2.9		24.55	14.4		2013-02-18	2013-03-08	18	3.04846	2.95051
E2-13	Diet	Cont.	48	17	5	Int.	Intestines	690	1.0592	690	1.8836	0.8244	3.9		20.95	13.6		2013-02-18	2013-03-08	18	4.09966	4.9729
E2-13	Diet	Cont.	48	18	6	Int.	Intestines	699	1.0446	699	1.6702	0.6256	1.2		15.08	12.3		2013-02-18	2013-03-08	18	1.26143	2.01636
E2-13	Diet	S-Ag	48	19	1	Int.	Intestines	709	1.0442	709	1.7794	0.7352	502.2		23.68	14.6		2013-02-18	2013-03-08	18	527.91	718.049	755.258	133.234		0.03143	0.0330586	0.00583185
E2-13	Diet	S-Ag	48	20	2	Int.	Intestines	717	1.0437	717	1.7352	0.6915	443.5		13.21	12		2013-02-18	2013-03-08	18	466.204	674.193				0.0295103
E2-13	Diet	S-Ag	48	21	3	Int.	Intestines	726	1.0549	726	2.0154	0.9605	522.8		25.2	14.5		2013-02-18	2013-03-08	18	549.564	572.165				0.0250444
E2-13	Diet	S-Ag	48	22	4	Int.	Intestines	735	1.0546	735	1.9342	0.8796	775.3		26.66	14.9		2013-02-18	2013-03-08	18	814.991	926.547				0.0405562
E2-13	Diet	S-Ag	48	23	5	Int.	Intestines	744	1.0413	744	2.1355	1.0942	782.2		24.65	14.8		2013-02-18	2013-03-08	18	822.244	751.457				0.0328923
E2-13	Diet	S-Ag	48	24	6	Int.	Intestines	753	1.0461	753	2.2046	1.1585	979.9		28.58	15.4		2013-02-18	2013-03-08	18	1030.06	889.137				0.0389187
E2-13	Diet	Ag+	48	25	1	Ki	Kidney	813	1.0431	813	1.1348	0.0917	0		12.91	12		2013-02-18	2013-02-21	3	0	0	10.0396	14.3832		0	0.000390234	0.00055907
E2-13	Diet	Ag+	48	26	2	Ki	Kidney	822	1.0538	822	1.2664	0.2126	0		23.31	14.3		2013-02-18	2013-02-21	3	0	0				0
E2-13	Diet	Ag+	48	27	3	Ki	Kidney	831	1.0393	831	1.1766	0.1373	3.6		20.72	13.6		2013-02-18	2013-02-21	3	3.63008	26.439				0.00102768
E2-13	Diet	Ag+	48	28	4	Ki	Kidney	840	1.0554	840	1.1805	0.1251	0		19.07	13.5		2013-02-18	2013-02-21	3	0	0				0
E2-13	Diet	Ag+	48	29	5	Ki	Kidney	849	1.0574	849	1.1798	0.1224	3.7		19.66	13.7		2013-02-18	2013-02-21	3	3.73092	30.4813				0.0011848
E2-13	Diet	Ag+	48	30	6	Ki	Kidney	858	1.0534	858	1.175	0.1216	0.4		15.54	12.9		2013-02-18	2013-02-21	3	0.403342	3.31696				0.000128929
E2-13	Diet	C-Ag	48	31	1	Ki	Kidney	759	1.046	759	1.2273	0.1813	0		24.26	14.7		2013-02-18	2013-02-21	3	0	0	2.18477	5.35157		0	8.49213e-05	0.000208014
E2-13	Diet	C-Ag	48	32	2	Ki	Kidney	768	1.0534	768	1.2371	0.1837	0		28.06	15.2		2013-02-18	2013-02-21	3	0	0				0
E2-13	Diet	C-Ag	48	33	3	Ki	Kidney	777	1.0492	777	1.2587	0.2095	0		25.92	14.7		2013-02-18	2013-02-21	3	0	0				0
E2-13	Diet	C-Ag	48	34	4	Ki	Kidney	786	1.0515	786	1.1353	0.0838	0		13.49	12.2		2013-02-18	2013-02-21	3	0	0				0
E2-13	Diet	C-Ag	48	35	5	Ki	Kidney	795	1.0571	795	1.1571	0.1	1.3		13.64	12.2		2013-02-18	2013-02-21	3	1.31086	13.1086				0.000509528
E2-13	Diet	C-Ag	48	36	6	Ki	Kidney	804	1.0397	804	1.2533	0.2136	0		26.18	14.8		2013-02-18	2013-02-21	3	0	0				0
E2-13	Diet	Cont.	48	37	1	Ki	Kidney	651	1.0516	651	1.1576	0.106	0	0	16.48	12.9		2013-02-18	2013-02-21	3	0	0	4.17546	6.63587
E2-13	Diet	Cont.	48	38	2	Ki	Kidney	660	1.0484	660	1.2083	0.1599	0	0	19.63	13.5		2013-02-18	2013-02-21	3	0	0
E2-13	Diet	Cont.	48	39	3	Ki	Kidney	669	1.0563	669	1.1716	0.1153	1.7	0	18.75	13.2		2013-02-18	2013-02-21	3	1.7142	14.8673
E2-13	Diet	Cont.	48	40	4	Ki	Kidney	678	1.048	678	1.1943	0.1463	0	0	24.55	14.4		2013-02-18	2013-02-21	3	0	0
E2-13	Diet	Cont.	48	41	5	Ki	Kidney	687	1.0451	687	1.1858	0.1407	0	0	20.95	13.6		2013-02-18	2013-02-21	3	0	0
E2-13	Diet	Cont.	48	42	6	Ki	Kidney	696	1.0587	696	1.1874	0.1287	1.3	0	15.08	12.3		2013-02-18	2013-02-21	3	1.31086	10.1854
E2-13	Diet	S-Ag	48	43	1	Ki	Kidney	705	1.0525	705	1.164	0.1115	0.8		23.68	14.6		2013-02-18	2013-02-21	3	0.806685	7.23484	21.5695	16.782		0.000316679	0.000944125	0.00073457
E2-13	Diet	S-Ag	48	44	2	Ki	Kidney	714	1.0478	714	1.1591	0.1113	2.3		13.21	12		2013-02-18	2013-02-21	3	2.31922	20.8375				0.000912087
E2-13	Diet	S-Ag	48	45	3	Ki	Kidney	723	1.0532	723	1.2358	0.1826	3.9		25.2	14.5		2013-02-18	2013-02-21	3	3.93259	21.5366				0.000942687
E2-13	Diet	S-Ag	48	46	4	Ki	Kidney	732	1.0457	732	1.2225	0.1768	6		26.66	14.9		2013-02-18	2013-02-21	3	6.05013	34.2202				0.00149786
E2-13	Diet	S-Ag	48	47	5	Ki	Kidney	741	1.0398	741	1.2171	0.1773	0		24.65	14.8		2013-02-18	2013-02-21	3	0	0				0
E2-13	Diet	S-Ag	48	48	6	Ki	Kidney	750	1.0467	750	1.2325	0.1858	8.4		28.58	15.4		2013-02-18	2013-02-21	3	8.47019	45.5877				0.00199543
E2-13	Diet	Ag+	48	49	1	Li	Liver	812	1.0497	812	1.1943	0.1446	57.8		12.91	12		2013-02-18	2013-03-06	16	60.4229	417.862	596.254	393.252		0.0162422	0.0231762	0.0152856	2.31762	1.52856	x10-2
E2-13	Diet	Ag+	48	50	2	Li	Liver	821	1.0528	821	1.427	0.3742	0		23.31	14.3		2013-02-18	2013-03-06	16	0	0				0
E2-13	Diet	Ag+	48	51	3	Li	Liver	830	1.0519	830	1.2692	0.2173	120.9		20.72	13.6		2013-02-18	2013-03-06	16	126.386	581.621				0.0226074
E2-13	Diet	Ag+	48	52	4	Li	Liver	839	1.0531	839	1.2857	0.2326	119.1		19.07	13.5		2013-02-18	2013-03-06	16	124.505	535.273				0.0208059
E2-13	Diet	Ag+	48	53	5	Li	Liver	848	1.0563	848	1.3076	0.2513	221.2		19.66	13.7		2013-02-18	2013-03-06	16	231.238	920.166				0.0357666
E2-13	Diet	Ag+	48	54	6	Li	Liver	857	1.059	857	1.2404	0.1814	194.8		15.54	12.9		2013-02-18	2013-03-06	16	203.64	1122.6				0.0436351
E2-13	Diet	C-Ag	48	55	1	Li	Liver	758	1.051	758	1.3777	0.3267	37.4		24.26	14.7		2013-02-18	2013-03-06	16	39.0972	119.673	122.214	77.2961		0.00286855	0.00292945	0.00185278	2.92945	1.85278	x10-3
E2-13	Diet	C-Ag	48	56	2	Li	Liver	767	1.0469	767	1.3536	0.3067	55		28.06	15.2		2013-02-18	2013-03-06	16	57.4958	187.466				0.00449354
E2-13	Diet	C-Ag	48	57	3	Li	Liver	776	1.045	776	1.2973	0.2523	10.5		25.92	14.7		2013-02-18	2013-03-06	16	10.9765	43.5057				0.00104283
E2-13	Diet	C-Ag	48	58	4	Li	Liver	785	1.0446	785	1.1731	0.1285	10.6		13.49	12.2		2013-02-18	2013-03-06	16	11.081	86.2336				0.00206701
E2-13	Diet	C-Ag	48	59	5	Li	Liver	794	1.0572	794	1.2547	0.1975	10.7		13.64	12.2		2013-02-18	2013-03-06	16	11.1856	56.6357				0.00135755
E2-13	Diet	C-Ag	48	60	6	Li	Liver	803	1.0384	803	1.4151	0.3767	86.4		26.18	14.8		2013-02-18	2013-03-06	16	90.3207	239.768				0.00574722
E2-13	Diet	Cont.	48	61	1	Li	Liver	650	1.0441	650	1.2438	0.1997	1.1		16.48	12.9		2013-02-18	2013-03-06	16	1.14992	5.75822	4.68668	5.958
E2-13	Diet	Cont.	48	62	2	Li	Liver	659	1.0486	659	1.2834	0.2348	1.7		19.63	13.5		2013-02-18	2013-03-06	16	1.77714	7.56876
E2-13	Diet	Cont.	48	63	3	Li	Liver	668	1.0402	668	1.2522	0.212	3		18.75	13.2		2013-02-18	2013-03-06	16	3.13614	14.7931
E2-13	Diet	Cont.	48	64	4	Li	Liver	677	1.0524	677	1.413	0.3606	0		24.55	14.4		2013-02-18	2013-03-06	16	0	0
E2-13	Diet	Cont.	48	65	5	Li	Liver	686	1.0523	686	1.2977	0.2454	0		20.95	13.6		2013-02-18	2013-03-06	16	0	0
E2-13	Diet	Cont.	48	66	6	Li	Liver	695	1.0558	695	1.243	0.1872	0		15.08	12.3		2013-02-18	2013-03-06	16	0	0
E2-13	Diet	S-Ag	48	67	1	Li	Liver	704	1.0453	704	1.3101	0.2648	223.4		23.68	14.6		2013-02-18	2013-03-06	16	233.538	881.94	615.363	220.054		0.0386037	0.0269353	0.00963205	2.69353	0.963205	x10-2
E2-13	Diet	S-Ag	48	68	2	Li	Liver	713	1.0513	713	1.2589	0.2076	92.3		13.21	12		2013-02-18	2013-03-06	16	96.4885	464.781				0.0203441
E2-13	Diet	S-Ag	48	69	3	Li	Liver	722	1.049	722	1.357	0.308	100.1		25.2	14.5		2013-02-18	2013-03-06	16	104.642	339.748				0.0148712
E2-13	Diet	S-Ag	48	70	4	Li	Liver	731	1.0486	731	1.3246	0.276	212.4		26.66	14.9		2013-02-18	2013-03-06	16	222.038	804.487				0.0352135
E2-13	Diet	S-Ag	48	71	5	Li	Liver	740	1.0464	740	1.41	0.3636	162.1		24.65	14.8		2013-02-18	2013-03-06	16	169.456	466.05				0.0203996
E2-13	Diet	S-Ag	48	72	6	Li	Liver	749	1.0401	749	1.399	0.3589	252.4		28.58	15.4		2013-02-18	2013-03-06	16	263.854	735.173				0.0321795
E2-13	Diet	Ag+	48	73	1	Mi	Spleen	819	1.0469	819	1.0633	0.0164	0		12.91	12		2013-02-18	2013-03-22	32	0	0	5.10662	12.5086		0
E2-13	Diet	Ag+	48	74	2	Mi	Spleen	828	1.0519	828	1.0917	0.0398	0		23.31	14.3		2013-02-18	2013-03-22	32	0	0				0
E2-13	Diet	Ag+	48	75	3	Mi	Spleen	837	1.0443	837	1.0606	0.0163	0		20.72	13.6		2013-02-18	2013-03-22	32	0	0				0
E2-13	Diet	Ag+	48	76	4	Mi	Spleen	846	1.055	846	1.0778	0.0228	0		19.07	13.5		2013-02-18	2013-03-22	32	0	0				0
E2-13	Diet	Ag+	48	77	5	Mi	Spleen	855	1.0587	855	1.0801	0.0214	0.6		19.66	13.7		2013-02-18	2013-03-22	32	0.65569	30.6397				0.00119096
E2-13	Diet	Ag+	48	78	6	Mi	Spleen	864	1.0593	864	1.0757	0.0164	0		15.54	12.9		2013-02-18	2013-03-22	32	0	0				0
E2-13	Diet	C-Ag	48	79	1	Mi	Spleen	765	1.0435	765	1.0753	0.0318	0		24.26	14.7		2013-02-18	2013-03-22	32	0	0	20.1255	49.2973		0
E2-13	Diet	C-Ag	48	80	2	Mi	Spleen	774	1.0508	774	1.0805	0.0297	0		28.06	15.2		2013-02-18	2013-03-22	32	0	0				0
E2-13	Diet	C-Ag	48	81	3	Mi	Spleen	783	1.0525	783	1.0868	0.0343	0		25.92	14.7		2013-02-18	2013-03-22	32	0	0				0
E2-13	Diet	C-Ag	48	82	4	Mi	Spleen	792	1.0495	792	1.0642	0.0147	0		13.49	12.2		2013-02-18	2013-03-22	32	0	0				0
E2-13	Diet	C-Ag	48	83	5	Mi	Spleen	801	1.0594	801	1.0775	0.0181	2		13.64	12.2		2013-02-18	2013-03-22	32	2.18563	120.753				0.00289444
E2-13	Diet	C-Ag	48	84	6	Mi	Spleen	810	1.058	810	1.1017	0.0437	0		26.18	14.8		2013-02-18	2013-03-22	32	0	0				0
E2-13	Diet	Cont.	48	85	1	Mi	Spleen	657	1.0419	657	1.0657	0.0238			16.48	12.9		2013-02-18	2013-03-22	32	0	0	6.62269	8.5037
E2-13	Diet	Cont.	48	86	2	Mi	Spleen	666	1.0453	666	1.0758	0.0305	0.5		19.63	13.5		2013-02-18	2013-03-22	32	0.546408	17.915
E2-13	Diet	Cont.	48	87	3	Mi	Spleen	675	1.0501	675	1.0712	0.0211	0.1		18.75	13.2		2013-02-18	2013-03-22	32	0.109282	5.17923
E2-13	Diet	Cont.	48	88	4	Mi	Spleen	684	1.0491	684	1.1145	0.0654	0		24.55	14.4		2013-02-18	2013-03-22	32	0	0
E2-13	Diet	Cont.	48	89	5	Mi	Spleen	693	1.0511	693	1.0845	0.0334	0		20.95	13.6		2013-02-18	2013-03-22	32	0	0
E2-13	Diet	Cont.	48	90	6	Mi	Spleen	702	1.0465	702	1.0662	0.0197	0.3		15.08	12.3		2013-02-18	2013-03-22	32	0.327845	16.6419
E2-13	Diet	S-Ag	48	91	1	Mi	Spleen	711	1.0589	711	1.0885	0.0296	0.9		23.68	14.6		2013-02-18	2013-03-22	32	0.983535	33.2275	35.714	45.322		0.00145441
E2-13	Diet	S-Ag	48	92	2	Mi	Spleen	720	1.0505	720	1.0686	0.0181	0		13.21	12		2013-02-18	2013-03-22	32	0	0				0
E2-13	Diet	S-Ag	48	93	3	Mi	Spleen	729	1.0412	729	1.0663	0.0251	0		25.2	14.5		2013-02-18	2013-03-22	32	0	0				0
E2-13	Diet	S-Ag	48	94	4	Mi	Spleen	738	1.0476	738	1.0715	0.0239	2.3		26.66	14.9		2013-02-18	2013-03-22	32	2.51348	105.166				0.00460328
E2-13	Diet	S-Ag	48	95	5	Mi	Spleen	747	1.0389	747	1.0821	0.0432	3		24.65	14.8		2013-02-18	2013-03-22	32	3.27845	75.89				0.00332181
E2-13	Diet	S-Ag	48	96	6	Mi	Spleen	756	1.0473	756	1.0871	0.0398	0		28.58	15.4		2013-02-18	2013-03-22	32	0	0				0

## Sheet: Water, tissue bioaccumulation
																		Decay corrected
Experiment code	Exposure rout	Exposure type	Sampling time	Fish nr	Fish nr	Organ	Organ	Tube nr	Before weight (g)	Tube nr	After weight (g)	Weight organ (g)	ccpm		ccpm for the controls	Weight fish (g)	Length fish (cm)	Half life 110m-ag days	Start exposure	Date samples measured	Days past since start of exp.	Decay corrected ccpm	ccpm/g tissue	Avg. Ccpm/g tissue	St.dev. Ccpm/g tissue		Conc. Fact. (ccpm/g tissue)/(avg ccpm/ mL water)	Avg bio conc. Factor	St.dev.	Avg over time
E2-13	Water	Ag+	3	101	1	Bi	Bile	1123	1.0578	1123	1.0715	0.0137	0.2					249.9	2013-02-27	2013-04-04	36	0.221002	16.1315	5.2825	8.18559		8.06576	2.64125	4.09279	137.112	184.573
E2-13	Water	Ag+	3	102	2	Bi	Bile	1133	1.0574	1133	1.0964	0.039	0						2013-02-27	2013-04-04	36	0	0				0
E2-13	Water	Ag+	3	103	3	Bi	Bile	1143	1.0481	1143	1.0839	0.0358	0						2013-02-27	2013-04-04	36	0	0				0
E2-13	Water	Ag+	3	104	4	Bi	Bile	1153	1.0483	1153	1.0838	0.0355	0.5						2013-02-27	2013-04-04	36	0.552504	15.5635				7.78175
E2-13	Water	Ag+	3	105	5	Bi	Bile	1163	1.0541	1163	1.0714	0.0173	0						2013-02-27	2013-04-04	36	0	0				0
E2-13	Water	Ag+	3	106	6	Bi	Bile	1173	1.0541	1173	1.0873	0.0332	0						2013-02-27	2013-04-04	36	0	0				0
E2-13	Water	Ag+	7	107	1	Bi	Bile	1303	1.0478	1303	1.0841	0.0363	0						2013-02-27	2013-04-04	36	0	0	15.4727	33.5226		0	7.73636	16.7613
E2-13	Water	Ag+	7	108	2	Bi	Bile	1313	1.0411	1313	1.0765	0.0354	0.3						2013-02-27	2013-04-04	36	0.331503	9.36448				4.68224
E2-13	Water	Ag+	7	109	3	Bi	Bile	1323	1.0397	1323	1.07	0.0303	0						2013-02-27	2013-04-04	36	0	0				0
E2-13	Water	Ag+	7	110	4	Bi	Bile	1333	1.0595	1333	1.0792	0.0197	0						2013-02-27	2013-04-04	36	0	0				0
E2-13	Water	Ag+	7	111	5	Bi	Bile	1343	1.0557	1343	1.0835	0.0278	2.1						2013-02-27	2013-04-04	36	2.32052	83.4719				41.7359														Control
E2-13	Water	Ag+	7	112	6	Bi	Bile	1353	1.0494	1353	1.0952	0.0458	0						2013-02-27	2013-04-04	36	0	0				0														3	7	24	48
E2-13	Water	Ag+	24	113	1	Bi	Bile	1483	1.0529	1483	1.0865	0.0336	14.7						2013-02-27	2013-04-04	36	16.2436	483.441	282.831	114.385		241.721	141.415	57.1924											Tissue
E2-13	Water	Ag+	24	114	2	Bi	Bile	1493	1.0598	1493	1.1045	0.0447	5.9						2013-02-27	2013-04-04	36	6.51955	145.851				72.9256													Bile
E2-13	Water	Ag+	24	115	3	Bi	Bile	1503	1.0481	1503	1.0789	0.0308	5.9						2013-02-27	2013-04-04	36	6.51955	211.674				105.837													Brain
E2-13	Water	Ag+	24	116	4	Bi	Bile	1513	1.0568	1513	1.0813	0.0245	6.9						2013-02-27	2013-04-04	36	7.62456	311.207				155.603													Gut content
E2-13	Water	Ag+	24	117	5	Bi	Bile	1523	1.045	1523	1.076	0.031	8						2013-02-27	2013-04-04	36	8.84007	285.164				142.582													Gill
E2-13	Water	Ag+	24	118	6	Bi	Bile	1533	1.0448	1533	1.0631	0.0183	4.3						2013-02-27	2013-04-04	36	4.75154	259.647				129.823													Heart
E2-13	Water	Ag+	48	119	1	Bi	Bile	1663	1.0581	1663	1.0842	0.0261	2.5						2013-02-27	2013-04-04	36	2.76252	105.844	793.31	520.239		52.9219	396.655	260.119			3.96655	2.60119	x10_2						Intestines
E2-13	Water	Ag+	48	120	2	Bi	Bile	1673	1.0513	1673	1.0897	0.0384	24.1						2013-02-27	2013-04-04	36	26.6307	693.508				346.754													Kidney
E2-13	Water	Ag+	48	121	3	Bi	Bile	1683	1.0537	1683	1.1144	0.0607	20.4						2013-02-27	2013-04-04	36	22.5422	371.37				185.685													Liver
E2-13	Water	Ag+	48	122	4	Bi	Bile	1693	1.0559	1693	1.0888	0.0329	29.6						2013-02-27	2013-04-04	36	32.7083	994.172				497.086													Spleen
E2-13	Water	Ag+	48	123	5	Bi	Bile	1703	1.0608	1703	1.0958	0.035	32.6						2013-02-27	2013-04-04	36	36.0233	1029.24				514.618
E2-13	Water	Ag+	48	124	6	Bi	Bile	1713	1.0614	1713	1.0921	0.0307	43.5						2013-02-27	2013-04-04	36	48.0679	1565.73				782.864
E2-13	Water	Cont.	3	125	1	Bi	Bile	1003	1.054	1003	1.0966	0.0426	0	0.816667	0				2013-02-27	2013-04-04	36	0	0	14.3124	17.801
E2-13	Water	Cont.	3	126	2	Bi	Bile	1013	1.0484	1013	1.0984	0.05	0	0.812585	0				2013-02-27	2013-04-04	36	0	0
E2-13	Water	Cont.	3	127	3	Bi	Bile	1023	1.0488	1023	1.0889	0.0401	1.2		0				2013-02-27	2013-04-04	36	1.32601	33.0676
E2-13	Water	Cont.	3	128	4	Bi	Bile	1033	1.0385	1033	1.078	0.0395	1.4		0				2013-02-27	2013-04-04	36	1.54701	39.1649
E2-13	Water	Cont.	3	129	5	Bi	Bile	1043	1.0517	1043	1.1003	0.0486	0.6		0				2013-02-27	2013-04-04	36	0.663005	13.6421
E2-13	Water	Cont.	3	130	6	Bi	Bile	1053	1.0473	1053	1.0745	0.0272	0		0				2013-02-27	2013-04-04	36	0	0
E2-13	Water	Cont.	7	131	1	Bi	Bile	1183	1.0475	1183
E2-13	Water	Cont.	7	132	2	Bi	Bile	1193	1.0463	1193
E2-13	Water	Cont.	7	133	3	Bi	Bile	1203	1.0447	1203
E2-13	Water	Cont.	7	134	4	Bi	Bile	1213	1.0407	1213
E2-13	Water	Cont.	7	135	5	Bi	Bile	1223	1.0567	1223
E2-13	Water	Cont.	7	136	6	Bi	Bile	1233	1.0482	1233
E2-13	Water	Cont.	24	137	1	Bi	Bile	1363	1.0615	1363	1.1193	0.0578	0.6		0				2013-02-27	2013-04-04	36	0.663005	11.4707	15.3616	19.0647
E2-13	Water	Cont.	24	138	2	Bi	Bile	1373	1.0613	1373	1.09	0.0287	1.2		0				2013-02-27	2013-04-04	36	1.32601	46.2025
E2-13	Water	Cont.	24	139	4	Bi	Bile	1383	1.0595	1383	1.0901	0.0306	0.1		0				2013-02-27	2013-04-04	36	0.110501	3.61114
E2-13	Water	Cont.	24	140	3	Bi	Bile	1393	1.0436	1393	1.0842	0.0406	0		0				2013-02-27	2013-04-04	36	0	0
E2-13	Water	Cont.	24	141	5	Bi	Bile	1403	1.061	1403	1.0932	0.0322	0.9		0				2013-02-27	2013-04-04	36	0.994508	30.8853
E2-13	Water	Cont.	24	142	6	Bi	Bile	1413	1.0488	1413	1.1011	0.0523	0		0				2013-02-27	2013-04-04	36	0	0
E2-13	Water	Cont.	48	143	1	Bi	Bile	1543	1.0522	1543	1.1006	0.0484	2		0				2013-02-27	2013-04-04	36	2.21002	45.6615	53.2736	35.9231
E2-13	Water	Cont.	48	144	2	Bi	Bile	1553	1.0588	1553	1.0885	0.0297	2.6		0				2013-02-27	2013-04-04	36	2.87302	96.7348
E2-13	Water	Cont.	48	145	3	Bi	Bile	1563	1.0579	1563	1.0909	0.033	0.8		0				2013-02-27	2013-04-04	36	0.884007	26.7881
E2-13	Water	Cont.	48	146	4	Bi	Bile	1573	1.0465	1573	1.1066	0.0601	0		0				2013-02-27	2013-04-04	36	0	0
E2-13	Water	Cont.	48	147	5	Bi	Bile	1583	1.0472	1583	1.0725	0.0253	1.7		0				2013-02-27	2013-04-04	36	1.87851	74.2496
E2-13	Water	Cont.	48	148	6	Bi	Bile	1593	1.0611	1593	1.0843	0.0232	1.6		0				2013-02-27	2013-04-04	36	1.76801	76.2075
E2-13	Water	S-Ag	3	149	1	Bi	Bile	1063	1.0491	1063	1.0681	0.019	0						2013-02-27	2013-04-04	36	0	0	15.4229	37.7783		0	6.42623	15.741	66.2485	74.1268
E2-13	Water	S-Ag	3	150	2	Bi	Bile	1073	1.0556	1073	1.0818	0.0262	0						2013-02-27	2013-04-04	36	0	0				0
E2-13	Water	S-Ag	3	151	3	Bi	Bile	1083	1.0584	1083	1.084	0.0256	0						2013-02-27	2013-04-04	36	0	0				0
E2-13	Water	S-Ag	3	152	4	Bi	Bile	1093	1.0555	1093	1.0885	0.033	0						2013-02-27	2013-04-04	36	0	0				0
E2-13	Water	S-Ag	3	153	5	Bi	Bile	1103	1.0542	1103	1.0745	0.0203	1.7						2013-02-27	2013-04-04	36	1.87851	92.5377				38.5574
E2-13	Water	S-Ag	3	154	6	Bi	Bile	1113	1.0461	1113	1.0719	0.0258	0						2013-02-27	2013-04-04	36	0	0				0
E2-13	Water	S-Ag	7	155	1	Bi	Bile	1243	1.0494	1243	1.0782	0.0288	2.7						2013-02-27	2013-04-04	36	2.98352	103.595	84.5387	112.308		43.1644	35.2245	46.7952
E2-13	Water	S-Ag	7	156	2	Bi	Bile	1253	1.0516	1253	1.0748	0.0232	0.2						2013-02-27	2013-04-04	36	0.221002	9.52594				3.96914
E2-13	Water	S-Ag	7	157	3	Bi	Bile	1263	1.0597	1263	1.1041	0.0444	1.9						2013-02-27	2013-04-04	36	2.09952	47.2864				19.7027
E2-13	Water	S-Ag	7	158	4	Bi	Bile	1273	1.0582	1273	1.0898	0.0316	1.3						2013-02-27	2013-04-04	36	1.43651	45.4592				18.9413
E2-13	Water	S-Ag	7	159	5	Bi	Bile	1283	1.0493	1283	1.0625	0.0132	3.6						2013-02-27	2013-04-04	36	3.97803	301.366				125.569
E2-13	Water	S-Ag	7	160	6	Bi	Bile	1293	1.0532	1293	1.0732	0.02	0						2013-02-27	2013-04-04	36	0	0				0
E2-13	Water	S-Ag	24	161	1	Bi	Bile	1423	1.0571	1423	1.0785	0.0214	0						2013-02-27	2013-04-04	36	0	0	117.972	76.6762		0	49.1552	31.9484
E2-13	Water	S-Ag	24	162	2	Bi	Bile	1433	1.0559	1433	1.0972	0.0413	3.7						2013-02-27	2013-04-04	36	4.08853	98.9959				41.2483
E2-13	Water	S-Ag	24	163	3	Bi	Bile	1443	1.0469	1443	1.1048	0.0579	9.9						2013-02-27	2013-04-04	36	10.9396	188.939				78.7247
E2-13	Water	S-Ag	24	164	4	Bi	Bile	1453	1.0428	1453	1.068	0.0252	4.1						2013-02-27	2013-04-04	36	4.53054	179.783				74.9096
E2-13	Water	S-Ag	24	165	5	Bi	Bile	1461	1.0513	1461	1.094	0.0427	6.8						2013-02-27	2013-04-04	36	7.51406	175.973				73.3222
E2-13	Water	S-Ag	24	166	6	Bi	Bile	1473	1.0562	1473	1.0941	0.0379	2.2						2013-02-27	2013-04-04	36	2.43102	64.143				26.7262
E2-13	Water	S-Ag	48	167	1	Bi	Bile	1603	1.0581	1603	1.1068	0.0487	29.9						2013-02-27	2013-04-04	36	33.0398	678.434	418.051	271.514		282.681	174.188	113.131			1.74188	1.13131	x10_2
E2-13	Water	S-Ag	48	168	2	Bi	Bile	1613	1.0478	1613	1.0739	0.0261	7.5						2013-02-27	2013-04-04	36	8.28756	317.531				132.305
E2-13	Water	S-Ag	48	169	3	Bi	Bile	1623	1.0507	1623	1.0691	0.0184	0.5						2013-02-27	2013-04-04	36	0.552504	30.0274				12.5114
E2-13	Water	S-Ag	48	170	4	Bi	Bile	1633	1.0569	1633	1.1007	0.0438	23.7						2013-02-27	2013-04-04	36	26.1887	597.916				249.132
E2-13	Water	S-Ag	48	171	5	Bi	Bile	1643	1.0586	1643	1.0893	0.0307	18.7						2013-02-27	2013-04-04	36	20.6637	673.083				280.451
E2-13	Water	S-Ag	48	172	6	Bi	Bile	1653	1.0613	1653	1.0864	0.0251	4.8						2013-02-27	2013-04-04	36	5.30404	211.316				88.0485
E2-13	Water	Ag+	3	101	1	Bl	Blood	1127	1.0522	1127																	0
E2-13	Water	Ag+	3	102	2	Bl	Blood	1137	1.0513	1137																	0
E2-13	Water	Ag+	3	103	3	Bl	Blood	1147	1.0485	1147																	0
E2-13	Water	Ag+	3	104	4	Bl	Blood	1157	1.0559	1157																	0
E2-13	Water	Ag+	3	105	5	Bl	Blood	1167	1.0427	1167																	0
E2-13	Water	Ag+	3	106	6	Bl	Blood	1177	1.0531	1177																	0
E2-13	Water	Ag+	7	107	1	Bl	Blood	1307	1.0407	1307																	0
E2-13	Water	Ag+	7	108	2	Bl	Blood	1317	1.0578	1317																	0
E2-13	Water	Ag+	7	109	3	Bl	Blood	1327	1.0405	1327																	0
E2-13	Water	Ag+	7	110	4	Bl	Blood	1337	1.0394	1337																	0
E2-13	Water	Ag+	7	111	5	Bl	Blood	1347	1.0534	1347																	0
E2-13	Water	Ag+	7	112	6	Bl	Blood	1357	1.0582	1357																	0
E2-13	Water	Ag+	24	113	1	Bl	Blood	1487	1.0574	1487																	0
E2-13	Water	Ag+	24	114	2	Bl	Blood	1497	1.0444	1497																	0
E2-13	Water	Ag+	24	115	3	Bl	Blood	1507	1.0484	1507																	0
E2-13	Water	Ag+	24	116	4	Bl	Blood	1517	1.0601	1517																	0
E2-13	Water	Ag+	24	117	5	Bl	Blood	1527	1.0493	1527																	0
E2-13	Water	Ag+	24	118	6	Bl	Blood	1537	1.0509	1537																	0
E2-13	Water	Ag+	48	119	1	Bl	Blood	1667	1.0513	1667																	0
E2-13	Water	Ag+	48	120	2	Bl	Blood	1677	1.0594	1677																	0
E2-13	Water	Ag+	48	121	3	Bl	Blood	1687	1.056	1687																	0
E2-13	Water	Ag+	48	122	4	Bl	Blood	1697	1.0613	1697																	0
E2-13	Water	Ag+	48	123	5	Bl	Blood	1707	1.0526	1707																	0
E2-13	Water	Ag+	48	124	6	Bl	Blood	1717	1.0557	1717																	0
E2-13	Water	Cont.	3	125	1	Bl	Blood	1007	1.0411	1007				#DIV/0!
E2-13	Water	Cont.	3	126	2	Bl	Blood	1017	1.0481	1017
E2-13	Water	Cont.	3	127	3	Bl	Blood	1027	1.0456	1027
E2-13	Water	Cont.	3	128	4	Bl	Blood	1037	1.0566	1037
E2-13	Water	Cont.	3	129	5	Bl	Blood	1047	1.0444	1047
E2-13	Water	Cont.	3	130	6	Bl	Blood	1057	1.0576	1057
E2-13	Water	Cont.	7	131	1	Bl	Blood	1187	1.05	1187
E2-13	Water	Cont.	7	132	2	Bl	Blood	1197	1.0489	1197
E2-13	Water	Cont.	7	133	3	Bl	Blood	1207	1.0463	1207
E2-13	Water	Cont.	7	134	4	Bl	Blood	1217	1.0539	1217
E2-13	Water	Cont.	7	135	5	Bl	Blood	1227	1.045	1227
E2-13	Water	Cont.	7	136	6	Bl	Blood	1237	1.0394	1237
E2-13	Water	Cont.	24	137	1	Bl	Blood	1367	1.055	1367
E2-13	Water	Cont.	24	138	2	Bl	Blood	1377	1.0444	1377
E2-13	Water	Cont.	24	139	4	Bl	Blood	1387	1.0612	1387
E2-13	Water	Cont.	24	140	3	Bl	Blood	1397	1.0604	1397
E2-13	Water	Cont.	24	141	5	Bl	Blood	1407	1.0571	1407
E2-13	Water	Cont.	24	142	6	Bl	Blood	1417	1.0499	1417
E2-13	Water	Cont.	48	143	1	Bl	Blood	1547	1.0497	1547																								x10_2
E2-13	Water	Cont.	48	144	2	Bl	Blood	1557	1.0427	1557
E2-13	Water	Cont.	48	145	3	Bl	Blood	1567	1.0477	1567
E2-13	Water	Cont.	48	146	4	Bl	Blood	1577	1.0516	1577
E2-13	Water	Cont.	48	147	5	Bl	Blood	1587	1.0503	1587
E2-13	Water	Cont.	48	148	6	Bl	Blood	1597	1.0474	1597
E2-13	Water	S-Ag	3	149	1	Bl	Blood	1067	1.0398	1067									2013-02-27								0
E2-13	Water	S-Ag	3	150	2	Bl	Blood	1077	1.0517	1077									2013-02-27								0
E2-13	Water	S-Ag	3	151	3	Bl	Blood	1087	1.0461	1087									2013-02-27								0
E2-13	Water	S-Ag	3	152	4	Bl	Blood	1097	1.0474	1097									2013-02-27								0
E2-13	Water	S-Ag	3	153	5	Bl	Blood	1107	1.0486	1107									2013-02-27								0
E2-13	Water	S-Ag	3	154	6	Bl	Blood	1117	1.0404	1117									2013-02-27								0
E2-13	Water	S-Ag	7	155	1	Bl	Blood	1247	1.0447	1247									2013-02-27								0
E2-13	Water	S-Ag	7	156	2	Bl	Blood	1257	1.0479	1257									2013-02-27								0
E2-13	Water	S-Ag	7	157	3	Bl	Blood	1267	1.0484	1267									2013-02-27								0
E2-13	Water	S-Ag	7	158	4	Bl	Blood	1277	1.0549	1277									2013-02-27								0
E2-13	Water	S-Ag	7	159	5	Bl	Blood	1287	1.0481	1287									2013-02-27								0
E2-13	Water	S-Ag	7	160	6	Bl	Blood	1297	1.0473	1297									2013-02-27								0
E2-13	Water	S-Ag	24	161	1	Bl	Blood	1427	1.0486	1427									2013-02-27								0
E2-13	Water	S-Ag	24	162	2	Bl	Blood	1437	1.0583	1437									2013-02-27								0
E2-13	Water	S-Ag	24	163	3	Bl	Blood	1447	1.0526	1447									2013-02-27								0
E2-13	Water	S-Ag	24	164	4	Bl	Blood	1457	1.0437	1457									2013-02-27								0
E2-13	Water	S-Ag	24	165	5	Bl	Blood	1467	1.0449	1467									2013-02-27								0
E2-13	Water	S-Ag	24	166	6	Bl	Blood	1477	1.0604	1477									2013-02-27								0
E2-13	Water	S-Ag	48	167	1	Bl	Blood	1607	1.0511	1607									2013-02-27								0
E2-13	Water	S-Ag	48	168	2	Bl	Blood	1617	1.0552	1617									2013-02-27								0
E2-13	Water	S-Ag	48	169	3	Bl	Blood	1627	1.0492	1627									2013-02-27								0
E2-13	Water	S-Ag	48	170	4	Bl	Blood	1637	1.0607	1637									2013-02-27								0
E2-13	Water	S-Ag	48	171	5	Bl	Blood	1647	1.045	1647									2013-02-27								0
E2-13	Water	S-Ag	48	172	6	Bl	Blood	1657	1.0615	1657									2013-02-27								0
E2-13	Water	Ag+	3	101	1	Br	Brain	1126	1.0511	1126	1.1147	0.0636	2						2013-02-27	2013-03-26	27	2.15553	33.892	5.64867	13.8363		16.946
E2-13	Water	Ag+	3	102	2	Br	Brain	1136	1.0531	1136	1.1305	0.0774	0						2013-02-27	2013-03-26	27	0	0				0
E2-13	Water	Ag+	3	103	3	Br	Brain	1146	1.0486	1146	1.0981	0.0495	0						2013-02-27	2013-03-26	27	0	0				0
E2-13	Water	Ag+	3	104	4	Br	Brain	1156	1.0405	1156	1.1089	0.0684	0						2013-02-27	2013-03-26	27	0	0				0
E2-13	Water	Ag+	3	105	5	Br	Brain	1166	1.0493	1166	1.1051	0.0558	0						2013-02-27	2013-03-26	27	0	0				0
E2-13	Water	Ag+	3	106	6	Br	Brain	1176	1.0523	1176	1.1162	0.0639	0						2013-02-27	2013-03-26	27	0	0				0
E2-13	Water	Ag+	7	107	1	Br	Brain	1306	1.0536	1306	1.0987	0.0451	0						2013-02-27	2013-03-26	27	0	0	9.65554	14.9589		0
E2-13	Water	Ag+	7	108	2	Br	Brain	1316	1.0466	1316	1.1168	0.0702	1.9						2013-02-27	2013-03-26	27	2.04775	29.1703				14.5851
E2-13	Water	Ag+	7	109	3	Br	Brain	1326	1.0531	1326	1.1216	0.0685	0						2013-02-27	2013-03-26	27	0	0				0
E2-13	Water	Ag+	7	110	4	Br	Brain	1336	1.0476	1336	1.1105	0.0629	0						2013-02-27	2013-03-26	27	0	0				0
E2-13	Water	Ag+	7	111	5	Br	Brain	1346	1.0443	1346	1.108	0.0637	1.7						2013-02-27	2013-03-26	27	1.8322	28.763				14.3815
E2-13	Water	Ag+	7	112	6	Br	Brain	1356	1.0515	1356	1.1203	0.0688	0						2013-02-27	2013-03-26	27	0	0				0
E2-13	Water	Ag+	24	113	1	Br	Brain	1486	1.0494	1486	1.1157	0.0663	2.5						2013-02-27	2013-03-26	27	2.69441	40.6397	9.57559	16.6381		20.3199
E2-13	Water	Ag+	24	114	2	Br	Brain	1496	1.0621	1496	1.1591	0.097	0						2013-02-27	2013-03-26	27	0	0				0
E2-13	Water	Ag+	24	115	3	Br	Brain	1506	1.0522	1506	1.1181	0.0659	0						2013-02-27	2013-03-26	27	0	0				0
E2-13	Water	Ag+	24	116	4	Br	Brain	1516	1.0509	1516	1.1234	0.0725	0						2013-02-27	2013-03-26	27	0	0				0
E2-13	Water	Ag+	24	117	5	Br	Brain	1526	1.0606	1526	1.1247	0.0641	1						2013-02-27	2013-03-26	27	1.07777	16.8138				8.40691
E2-13	Water	Ag+	24	118	6	Br	Brain	1536	1.0567	1536	1.1354	0.0787	0						2013-02-27	2013-03-26	27	0	0				0
E2-13	Water	Ag+	48	119	1	Br	Brain	1666	1.0491	1666	1.1215	0.0724	0.7						2013-02-27	2013-03-26	27	0.754436	10.4204	2.65476	4.39631		5.21019
E2-13	Water	Ag+	48	120	2	Br	Brain	1676	1.0618	1676	1.1177	0.0559	0						2013-02-27	2013-03-26	27	0	0				0
E2-13	Water	Ag+	48	121	3	Br	Brain	1686	1.0541	1686	1.1314	0.0773	0						2013-02-27	2013-03-26	27	0	0				0
E2-13	Water	Ag+	48	122	4	Br	Brain	1696	1.0486	1696	1.1329	0.0843	0						2013-02-27	2013-03-26	27	0	0				0
E2-13	Water	Ag+	48	123	5	Br	Brain	1706	1.0482	1706	1.1069	0.0587	0.3						2013-02-27	2013-03-26	27	0.32333	5.50817				2.75409
E2-13	Water	Ag+	48	124	6	Br	Brain	1716	1.0516	1716	1.1083	0.0567	0						2013-02-27	2013-03-26	27	0	0				0
E2-13	Water	Cont.	3	125	1	Br	Brain	1006	1.0398	1006	1.1085	0.0687	0.3	0.338889	0				2013-02-27	2013-03-26	27	0.32333	4.7064	9.33292	7.81165
E2-13	Water	Cont.	3	126	2	Br	Brain	1016	1.0461	1016	1.1206	0.0745	1.3	0.57511	0				2013-02-27	2013-03-26	27	1.4011	18.8066
E2-13	Water	Cont.	3	127	3	Br	Brain	1026	1.0435	1026	1.0984	0.0549	0		0				2013-02-27	2013-03-26	27	0	0
E2-13	Water	Cont.	3	128	4	Br	Brain	1036	1.0574	1036	1.1144	0.057	0.8		0				2013-02-27	2013-03-26	27	0.862212	15.1265
E2-13	Water	Cont.	3	129	5	Br	Brain	1046	1.0498	1046	1.0718	0.022	0.3		0				2013-02-27	2013-03-26	27	0.32333	14.6968
E2-13	Water	Cont.	3	130	6	Br	Brain	1056	1.0505	1056	1.1315	0.081	0.2		0				2013-02-27	2013-03-26	27	0.215553	2.66115
E2-13	Water	Cont.	7	131	1	Br	Brain	1186	1.0517	1186
E2-13	Water	Cont.	7	132	2	Br	Brain	1196	1.0453	1196
E2-13	Water	Cont.	7	133	3	Br	Brain	1206	1.0435	1206
E2-13	Water	Cont.	7	134	4	Br	Brain	1216	1.0408	1216
E2-13	Water	Cont.	7	135	5	Br	Brain	1226	1.0512	1226
E2-13	Water	Cont.	7	136	6	Br	Brain	1236	1.0557	1236
E2-13	Water	Cont.	24	137	1	Br	Brain	1366	1.0446	1366	1.1216	0.077	0		0				2013-02-27	2013-03-26	27	0	0	0	0
E2-13	Water	Cont.	24	138	2	Br	Brain	1376	1.0491	1376	1.1173	0.0682	0		0				2013-02-27	2013-03-26	27	0	0
E2-13	Water	Cont.	24	139	4	Br	Brain	1386	1.0511	1386	1.1467	0.0956	0		0				2013-02-27	2013-03-26	27	0	0
E2-13	Water	Cont.	24	140	3	Br	Brain	1396	1.0554	1396	1.1198	0.0644	0		0				2013-02-27	2013-03-26	27	0	0
E2-13	Water	Cont.	24	141	5	Br	Brain	1406	1.0422	1406	1.094	0.0518	0		0				2013-02-27	2013-03-26	27	0	0
E2-13	Water	Cont.	24	142	6	Br	Brain	1416	1.0493	1416	1.1095	0.0602	0		0				2013-02-27	2013-03-26	27	0	0
E2-13	Water	Cont.	48	143	1	Br	Brain	1546	1.0608	1546	1.0913	0.0305	1.7		0				2013-02-27	2013-03-26	27	1.8322	60.0722	14.3231	24.6853									x10_1
E2-13	Water	Cont.	48	144	2	Br	Brain	1556	1.0437	1556	1.1188	0.0751	0		0				2013-02-27	2013-03-26	27	0	0
E2-13	Water	Cont.	48	145	3	Br	Brain	1566	1.0589	1566	1.1214	0.0625	1.5		0				2013-02-27	2013-03-26	27	1.61665	25.8664
E2-13	Water	Cont.	48	146	4	Br	Brain	1576	1.0539	1576	1.1418	0.0879	0		0				2013-02-27	2013-03-26	27	0	0
E2-13	Water	Cont.	48	147	5	Br	Brain	1586	1.0473	1586	1.1032	0.0559	0		0				2013-02-27	2013-03-26	27	0	0
E2-13	Water	Cont.	48	148	6	Br	Brain	1596	1.0585	1596	1.1039	0.0454	0		0				2013-02-27	2013-03-26	27	0	0
E2-13	Water	S-Ag	3	149	1	Br	Brain	1066	1.0542	1066	1.0999	0.0457	0						2013-02-27	2013-03-26	27	0	0	4.90812	10.0106		0
E2-13	Water	S-Ag	3	150	2	Br	Brain	1076	1.0454	1076	1.1014	0.056	1.3						2013-02-27	2013-03-26	27	1.4011	25.0196				10.4248
E2-13	Water	S-Ag	3	151	3	Br	Brain	1086	1.0509	1086	1.1239	0.073	0.3						2013-02-27	2013-03-26	27	0.32333	4.42917				1.84549
E2-13	Water	S-Ag	3	152	4	Br	Brain	1096	1.0468	1096	1.1038	0.057	0						2013-02-27	2013-03-26	27	0	0				0
E2-13	Water	S-Ag	3	153	5	Br	Brain	1106	1.0514	1106	1.1281	0.0767	0						2013-02-27	2013-03-26	27	0	0				0
E2-13	Water	S-Ag	3	154	6	Br	Brain	1116	1.0406	1116	1.0821	0.0415	0						2013-02-27	2013-03-26	27	0	0				0
E2-13	Water	S-Ag	7	155	1	Br	Brain	1246	1.0429	1246	1.1077	0.0648	0						2013-02-27	2013-03-26	27	0	0	8.01404	16.396		0
E2-13	Water	S-Ag	7	156	2	Br	Brain	1256	1.0557	1256	1.1163	0.0606	0						2013-02-27	2013-03-26	27	0	0				0
E2-13	Water	S-Ag	7	157	3	Br	Brain	1266	1.0578	1266	1.1446	0.0868	3.3						2013-02-27	2013-03-26	27	3.55663	40.975				17.0729
E2-13	Water	S-Ag	7	158	4	Br	Brain	1276	1.0576	1276	1.1452	0.0876	0						2013-02-27	2013-03-26	27	0	0				0
E2-13	Water	S-Ag	7	159	5	Br	Brain	1286	1.0386	1286	1.108	0.0694	0						2013-02-27	2013-03-26	27	0	0				0
E2-13	Water	S-Ag	7	160	6	Br	Brain	1296	1.0546	1296	1.1304	0.0758	0.5						2013-02-27	2013-03-26	27	0.538883	7.10927				2.9622
E2-13	Water	S-Ag	24	161	1	Br	Brain	1426	1.0631	1426	1.1423	0.0792	0						2013-02-27	2013-03-26	27	0	0	10.4934	20.2069		0
E2-13	Water	S-Ag	24	162	2	Br	Brain	1436	1.0599	1436	1.1441	0.0842	0						2013-02-27	2013-03-26	27	0	0				0
E2-13	Water	S-Ag	24	163	3	Br	Brain	1446	1.0568	1446	1.1102	0.0534	2.5						2013-02-27	2013-03-26	27	2.69441	50.4572				21.0238
E2-13	Water	S-Ag	24	164	4	Br	Brain	1456	1.0582	1456	1.1245	0.0663	0						2013-02-27	2013-03-26	27	0	0				0
E2-13	Water	S-Ag	24	165	5	Br	Brain	1466	1.0526	1466	1.1123	0.0597	0						2013-02-27	2013-03-26	27	0	0				0
E2-13	Water	S-Ag	24	166	6	Br	Brain	1476	1.0491	1476	1.1353	0.0862	1						2013-02-27	2013-03-26	27	1.07777	12.5031				5.20962
E2-13	Water	S-Ag	48	167	1	Br	Brain	1606	1.0549	1606	1.1272	0.0723	0						2013-02-27	2013-03-26	27	0	0	0	0		0							x10_2
E2-13	Water	S-Ag	48	168	2	Br	Brain	1616	1.0558	1616	1.1323	0.0765	0						2013-02-27	2013-03-26	27	0	0				0
E2-13	Water	S-Ag	48	169	3	Br	Brain	1626	1.0637	1626	1.1188	0.0551	0						2013-02-27	2013-03-26	27	0	0				0
E2-13	Water	S-Ag	48	170	4	Br	Brain	1636	1.0442	1636	1.1242	0.08	0						2013-02-27	2013-03-26	27	0	0				0
E2-13	Water	S-Ag	48	171	5	Br	Brain	1646	1.0572	1646	1.1055	0.0483	0						2013-02-27	2013-03-26	27	0	0				0
E2-13	Water	S-Ag	48	172	6	Br	Brain	1656	1.0504	1656	1.1244	0.074	0						2013-02-27	2013-03-26	27	0	0				0
E2-13	Water	Ag+	3	101	1	GC	GC	1129	1.0556	1129	1.066	0.0104	0.4						2013-02-27	2013-04-09	41	0.448176	43.0939	50.7457	98.1659		21.5469
E2-13	Water	Ag+	3	102	2	GC	GC	1139	1.0565	1139	1.0987	0.0422	0						2013-02-27	2013-04-09	41	0	0				0
E2-13	Water	Ag+	3	103	3	GC	GC	1149	1.0486	1149	1.0731	0.0245	0						2013-02-27	2013-04-09	41	0	0				0
E2-13	Water	Ag+	3	104	4	GC	GC	1159	1.0518	1159	1.0688	0.017	0.2						2013-02-27	2013-04-09	41	0.224088	13.1816				6.59082
E2-13	Water	Ag+	3	105	5	GC	GC	1169	1.0588	1169	1.0746	0.0158	3.5						2013-02-27	2013-04-09	41	3.92154	248.199				124.099
E2-13	Water	Ag+	3	106	6	GC	GC	1179	1.0453	1179	1.0657	0.0204	0						2013-02-27	2013-04-09	41	0	0				0
E2-13	Water	Ag+	7	107	1	GC	GC	1309	1.0504	1309	1.0629	0.0125	1.9						2013-02-27	2013-04-09	41	2.12884	170.307	28.3845	69.5275		85.1535
E2-13	Water	Ag+	7	108	2	GC	GC	1319	1.0402	1319	1.0782	0.038	0						2013-02-27	2013-04-09	41	0	0				0
E2-13	Water	Ag+	7	109	3	GC	GC	1329	1.0411	1329	1.0627	0.0216	0						2013-02-27	2013-04-09	41	0	0				0
E2-13	Water	Ag+	7	110	4	GC	GC	1339	1.0485	1339	1.0934	0.0449	0						2013-02-27	2013-04-09	41	0	0				0
E2-13	Water	Ag+	7	111	5	GC	GC	1349	1.046	1349	1.0481	0.0021	0						2013-02-27	2013-04-09	41	0	0				0
E2-13	Water	Ag+	7	112	6	GC	GC	1359	1.0403	1359	1.0461	0.0058	0						2013-02-27	2013-04-09	41	0	0				0
E2-13	Water	Ag+	24	113	1	GC	GC	1489	1.0524	1489	1.0783	0.0259	2.6						2013-02-27	2013-04-09	41	2.91314	112.477	63.9532	108.119		56.2383
E2-13	Water	Ag+	24	114	2	GC	GC	1499	1.0601	1499	1.1152	0.0551	0.3						2013-02-27	2013-04-09	41	0.336132	6.1004				3.0502
E2-13	Water	Ag+	24	115	3	GC	GC	1509	1.0604	1509	1.0866	0.0262	6.2						2013-02-27	2013-04-09	41	6.94673	265.142				132.571
E2-13	Water	Ag+	24	116	4	GC	GC	1519	1.0525	1519	1.0857	0.0332	0						2013-02-27	2013-04-09	41	0	0				0
E2-13	Water	Ag+	24	117	5	GC	GC	1529	1.0436	1529	1.1107	0.0671	0						2013-02-27	2013-04-09	41	0	0				0
E2-13	Water	Ag+	24	118	6	GC	GC	1539	1.0438	1539	1.0989	0.0551	0						2013-02-27	2013-04-09	41	0	0				0
E2-13	Water	Ag+	48	119	1	GC	GC	1669	1.0473	1669	1.0841	0.0368	1						2013-02-27	2013-04-09	41	1.12044	30.4467	42.4106	49.5535		15.2234
E2-13	Water	Ag+	48	120	2	GC	GC	1679	1.0486	1679	1.0633	0.0147	0.2						2013-02-27	2013-04-09	41	0.224088	15.2441				7.62204
E2-13	Water	Ag+	48	121	3	GC	GC	1689	1.0573	1689	1.0728	0.0155	0						2013-02-27	2013-04-09	41	0	0				0
E2-13	Water	Ag+	48	122	4	GC	GC	1699	1.0505	1699	1.0783	0.0278	2.4						2013-02-27	2013-04-09	41	2.68906	96.7286				48.3643
E2-13	Water	Ag+	48	123	5	GC	GC	1709	1.0592	1709	1.0947	0.0355	0						2013-02-27	2013-04-09	41	0	0				0
E2-13	Water	Ag+	48	124	6	GC	GC	1719	1.0634	1719	1.0654	0.002	0.2						2013-02-27	2013-04-09	41	0.224088	112.044				56.022
E2-13	Water	Cont.	3	125	1	GC	GC	1009	1.0493	1009	1.0701	0.0208	0	0.7	0				2013-02-27	2013-04-09	41	0	0	8.2537	20.2174
E2-13	Water	Cont.	3	126	2	GC	GC	1019	1.0536	1019	1.0738	0.0202	0		0				2013-02-27	2013-04-09	41	0	0
E2-13	Water	Cont.	3	127	3	GC	GC	1029	1.055	1029	1.1076	0.0526	0		0				2013-02-27	2013-04-09	41	0	0
E2-13	Water	Cont.	3	128	4	GC	GC	1039	1.0555	1039	1.0869	0.0314	0		0				2013-02-27	2013-04-09	41	0	0
E2-13	Water	Cont.	3	129	5	GC	GC	1049	1.0549	1049	1.073	0.0181	0.8		0				2013-02-27	2013-04-09	41	0.896352	49.5222
E2-13	Water	Cont.	3	130	6	GC	GC	1059	1.0562	1059	1.0701	0.0139	0		0				2013-02-27	2013-04-09	41	0	0
E2-13	Water	Cont.	7	131	1	GC	GC	1189	1.0581	1189
E2-13	Water	Cont.	7	132	2	GC	GC	1199	1.0512	1199
E2-13	Water	Cont.	7	133	3	GC	GC	1209	1.0537	1209
E2-13	Water	Cont.	7	134	4	GC	GC	1219	1.0593	1219
E2-13	Water	Cont.	7	135	5	GC	GC	1229	1.0465	1229
E2-13	Water	Cont.	7	136	6	GC	GC	1239	1.0461	1239
E2-13	Water	Cont.	24	137	1	GC	GC	1369	1.0514	1369	1.0928	0.0414	0		0				2013-02-27	2013-04-09	41	0	0	64.207	67.4065
E2-13	Water	Cont.	24	138	2	GC	GC	1379	1.0491	1379	1.0817	0.0326	1.1		0				2013-02-27	2013-04-09	41	1.23248	37.8063
E2-13	Water	Cont.	24	139	4	GC	GC	1389	1.0486	1389	1.0736	0.025	3.9		0				2013-02-27	2013-04-09	41	4.36972	174.789
E2-13	Water	Cont.	24	140	3	GC	GC	1399	1.0507	1399	1.0735	0.0228	2.1		0				2013-02-27	2013-04-09	41	2.35292	103.198
E2-13	Water	Cont.	24	141	5	GC	GC	1405	1.0577	1405	1.0819	0.0242	1.5		0				2013-02-27	2013-04-09	41	1.68066	69.4488
E2-13	Water	Cont.	24	142	6	GC	GC	1419	1.0491	1419	1.0709	0.0218	0		0				2013-02-27	2013-04-09	41	0	0
E2-13	Water	Cont.	48	143	1	GC	GC	1549	1.057	1549	1.0925	0.0355	1.3		0				2013-02-27	2013-04-09	41	1.45657	41.0302	16.447	18.5656
E2-13	Water	Cont.	48	144	2	GC	GC	1559	1.0497	1559	1.0876	0.0379	1		0				2013-02-27	2013-04-09	41	1.12044	29.5631
E2-13	Water	Cont.	48	145	3	GC	GC	1569	1.0554	1569	1.0711	0.0157	0		0				2013-02-27	2013-04-09	41	0	0
E2-13	Water	Cont.	48	146	4	GC	GC	1579	1.0486	1579	1.0845	0.0359	0.9		0				2013-02-27	2013-04-09	41	1.0084	28.089
E2-13	Water	Cont.	48	147	5	GC	GC	1589	1.0588	1589	1.0608	0.002	0		0				2013-02-27	2013-04-09	41	0	0
E2-13	Water	Cont.	48	148	6	GC	GC	1599	1.0487	1599	1.0593	0.0106	0		0				2013-02-27	2013-04-09	41	0	0
E2-13	Water	S-Ag	3	149	1	GC	GC	1069	1.0507	1069	1.0861	0.0354	0.2						2013-02-27	2013-04-09	41	0.224088	6.33017	39.2204	85.7817		2.63757
E2-13	Water	S-Ag	3	150	2	GC	GC	1079	1.0573	1079	1.0647	0.0074	0						2013-02-27	2013-04-09	41	0	0				0
E2-13	Water	S-Ag	3	151	3	GC	GC	1089	1.0567	1089	1.0712	0.0145	0						2013-02-27	2013-04-09	41	0	0				0
E2-13	Water	S-Ag	3	152	4	GC	GC	1099	1.0571	1099	1.0791	0.022	4.2						2013-02-27	2013-04-09	41	4.70585	213.902				89.1259
E2-13	Water	S-Ag	3	153	5	GC	GC	1109	1.0462	1109	1.1056	0.0594	0.8						2013-02-27	2013-04-09	41	0.896352	15.0901				6.28754
E2-13	Water	S-Ag	3	154	6	GC	GC	1119	1.0589	1119	1.0915	0.0326	0						2013-02-27	2013-04-09	41	0	0				0
E2-13	Water	S-Ag	7	155	1	GC	GC	1249	1.0572	1249	1.0747	0.0175	0.5						2013-02-27	2013-04-09	41	0.56022	32.0126	7.7147	12.8397		13.3386
E2-13	Water	S-Ag	7	156	2	GC	GC	1259	1.0599	1259	1.1052	0.0453	0.5						2013-02-27	2013-04-09	41	0.56022	12.3669				5.15287
E2-13	Water	S-Ag	7	157	3	GC	GC	1269	1.0531	1269	1.1118	0.0587	0.1						2013-02-27	2013-04-09	41	0.112044	1.90876				0.795315
E2-13	Water	S-Ag	7	158	4	GC	GC	1279	1.0453	1279	1.0567	0.0114	0						2013-02-27	2013-04-09	41	0	0				0
E2-13	Water	S-Ag	7	159	5	GC	GC	1289	1.0566	1289	1.1251	0.0685	0						2013-02-27	2013-04-09	41	0	0				0
E2-13	Water	S-Ag	7	160	6	GC	GC	1299	1.0526	1299	1.0765	0.0239	0						2013-02-27	2013-04-09	41	0	0				0
E2-13	Water	S-Ag	24	161	1	GC	GC	1429	1.0607	1429	1.0786	0.0179	0.9						2013-02-27	2013-04-09	41	1.0084	56.335	40.0003	37.6971		23.4729
E2-13	Water	S-Ag	24	162	2	GC	GC	1439	1.0511	1439	1.0654	0.0143	0.3						2013-02-27	2013-04-09	41	0.336132	23.5057				9.79406
E2-13	Water	S-Ag	24	163	3	GC	GC	1449	1.0601	1449	1.0745	0.0144	0						2013-02-27	2013-04-09	41	0	0				0
E2-13	Water	S-Ag	24	164	4	GC	GC	1459	1.0569	1459	1.1267	0.0698	3.8						2013-02-27	2013-04-09	41	4.25767	60.9982				25.4159
E2-13	Water	S-Ag	24	165	5	GC	GC	1469	1.0515	1469	1.089	0.0375	0.1						2013-02-27	2013-04-09	41	0.112044	2.98784				1.24493
E2-13	Water	S-Ag	24	166	6	GC	GC	1479	1.0422	1479	1.0655	0.0233	2						2013-02-27	2013-04-09	41	2.24088	96.1751				40.073
E2-13	Water	S-Ag	48	167	1	GC	GC	1609	1.0481	1609	1.1275	0.0794	5.4						2013-02-27	2013-04-09	41	6.05038	76.2012	162.605	192.13		31.7505
E2-13	Water	S-Ag	48	168	2	GC	GC	1619	1.0611	1619	1.0676	0.0065	3.2						2013-02-27	2013-04-09	41	3.58541	551.601				229.834
E2-13	Water	S-Ag	48	169	3	GC	GC	1629	1.0535	1629	1.0624	0.0089	1						2013-02-27	2013-04-09	41	1.12044	125.892				52.4551
E2-13	Water	S-Ag	48	170	4	GC	GC	1639	1.0546	1639	1.1641	0.1095	6.4						2013-02-27	2013-04-09	41	7.17082	65.4869				27.2862
E2-13	Water	S-Ag	48	171	5	GC	GC	1649	1.0578	1649	1.0853	0.0275	2.4						2013-02-27	2013-04-09	41	2.68906	97.7839				40.7433
E2-13	Water	S-Ag	48	172	6	GC	GC	1659	1.0481	1659	1.0863	0.0382	2						2013-02-27	2013-04-09	41	2.24088	58.6618				24.4424
E2-13	Water	Ag+	3	101	1	Gi	Gill	1120	1.0524	1120	1.1701	0.1177	63.8			5.22	8.9		2013-02-27	2013-04-08	40	71.2861	605.659	1382.52	671.243		302.83	691.261	335.622	641.325	66.7359
E2-13	Water	Ag+	3	102	2	Gi	Gill	1130	1.0455	1130	1.2699	0.2244	269.8			10.56	10.8		2013-02-27	2013-04-08	40	301.457	1343.39				671.697
E2-13	Water	Ag+	3	103	3	Gi	Gill	1140	1.0509	1140	1.2782	0.2273	239.9			9.45	10.5		2013-02-27	2013-04-08	40	268.049	1179.27				589.637
E2-13	Water	Ag+	3	104	4	Gi	Gill	1150	1.041	1150	1.2708	0.2298	270.5			10.88	11.1		2013-02-27	2013-04-08	40	302.24	1315.23				657.614
E2-13	Water	Ag+	3	105	5	Gi	Gill	1160	1.0573	1160	1.2699	0.2126	231.1			7.77	9.7		2013-02-27	2013-04-08	40	258.217	1214.56				607.282
E2-13	Water	Ag+	3	106	6	Gi	Gill	1170	1.0511	1170	1.1894	0.1383	326.4			8.75	10.2		2013-02-27	2013-04-08	40	364.699	2637.01				1318.51
E2-13	Water	Ag+	7	107	1	Gi	Gill	1300	1.0506	1300	1.2178	0.1672	169.2			7.19	9.4		2013-02-27	2013-04-08	40	189.053	1130.7	1274.84	276.003		565.351	637.419	138.001
E2-13	Water	Ag+	7	108	2	Gi	Gill	1310	1.0522	1310	1.2737	0.2215	204.5			9.49	10.8		2013-02-27	2013-04-08	40	228.495	1031.58				515.791
E2-13	Water	Ag+	7	109	3	Gi	Gill	1320	1.0472	1320	1.2276	0.1804	257.9			8.66	10.3		2013-02-27	2013-04-08	40	288.161	1597.35				798.673
E2-13	Water	Ag+	7	110	4	Gi	Gill	1330	1.0577	1330	1.3182	0.2605	227.1			11.07	11.2		2013-02-27	2013-04-08	40	253.747	974.077				487.039
E2-13	Water	Ag+	7	111	5	Gi	Gill	1340	1.0553	1340	1.1993	0.144	206			8.3	10		2013-02-27	2013-04-08	40	230.171	1598.41				799.206
E2-13	Water	Ag+	7	112	6	Gi	Gill	1350	1.0415	1350	1.266	0.2245	264.6			10.21	10.7		2013-02-27	2013-04-08	40	295.647	1316.91				658.457
E2-13	Water	Ag+	24	113	1	Gi	Gill	1480	1.0499	1480	1.2504	0.2005	188.5			9.67	10.7		2013-02-27	2013-04-08	40	210.618	1050.46	1376.57	404.914		525.232	688.284	202.457
E2-13	Water	Ag+	24	114	2	Gi	Gill	1490	1.0574	1490	1.3621	0.3047	451.5			14.59	12.3		2013-02-27	2013-04-08	40	504.478	1655.65				827.827
E2-13	Water	Ag+	24	115	3	Gi	Gill	1500	1.0491	1500	1.2474	0.1983	169.7			8.38	10.4		2013-02-27	2013-04-08	40	189.612	956.188				478.094
E2-13	Water	Ag+	24	116	4	Gi	Gill	1510	1.0497	1510	1.3041	0.2544	279.9			10.59	10.9		2013-02-27	2013-04-08	40	312.743	1229.33				614.667
E2-13	Water	Ag+	24	117	5	Gi	Gill	1520	1.0492	1520	1.2378	0.1886	343.7			8.48	10.5		2013-02-27	2013-04-08	40	384.029	2036.21				1018.1
E2-13	Water	Ag+	24	118	6	Gi	Gill	1530	1.0624	1530	1.2559	0.1935	230.6			7.89	10.2		2013-02-27	2013-04-08	40	257.658	1331.57				665.783
E2-13	Water	Ag+	48	119	1	Gi	Gill	1660	1.0575	1660	1.2392	0.1817	138.4			8.04	10		2013-02-27	2013-04-08	40	154.639	851.07	1096.67	205.265		425.535	548.336	102.633			5.48336	1.02633	x10_2
E2-13	Water	Ag+	48	120	2	Gi	Gill	1670	1.0641	1670	1.1861	0.122	133.6			8.37	10.4		2013-02-27	2013-04-08	40	149.276	1223.58				611.788
E2-13	Water	Ag+	48	121	3	Gi	Gill	1680	1.0514	1680	1.2853	0.2339	189.8			8.75	10.7		2013-02-27	2013-04-08	40	212.071	906.672				453.336
E2-13	Water	Ag+	48	122	4	Gi	Gill	1690	1.0595	1690	1.2437	0.1842	231.8			9.19	10.7		2013-02-27	2013-04-08	40	258.999	1406.07				703.037
E2-13	Water	Ag+	48	123	5	Gi	Gill	1700	1.0592	1700	1.2836	0.2244	213.2			8.45	10.4		2013-02-27	2013-04-08	40	238.216	1061.57				530.785
E2-13	Water	Ag+	48	124	6	Gi	Gill	1710	1.0622	1710	1.2412	0.179	181.2			8.25	10.3		2013-02-27	2013-04-08	40	202.461	1131.07				565.535
E2-13	Water	Cont.	3	125	1	Gi	Gill	1000	1.0465	1000	1.3034	0.2569	1.1	1.22778	0	9.16	11.6		2013-02-27	2013-04-08	40	1.22907	4.78424	5.57781	5.55688
E2-13	Water	Cont.	3	126	2	Gi	Gill	1010	1.0475	1010	1.3983	0.3508	4.7	1.3936	0	14.52	13.1		2013-02-27	2013-04-08	40	5.25148	14.97
E2-13	Water	Cont.	3	127	3	Gi	Gill	1020	1.0525	1020	1.2987	0.2462	0		0	10.55	11.7		2013-02-27	2013-04-08	40	0	0
E2-13	Water	Cont.	3	128	4	Gi	Gill	1030	1.0561	1030	1.3068	0.2507	1.5		0	11.13	12.2		2013-02-27	2013-04-08	40	1.67601	6.6853
E2-13	Water	Cont.	3	129	5	Gi	Gill	1040	1.0537	1040	1.2763	0.2226	1.4		0	9.34	11.8		2013-02-27	2013-04-08	40	1.56427	7.02727
E2-13	Water	Cont.	3	130	6	Gi	Gill	1050	1.0471	1050	1.2395	0.1924	0		0	9.93	11.8		2013-02-27	2013-04-08	40	0	0
E2-13	Water	Cont.	7	131	1	Gi	Gill	1180	1.0461	1180						12.36	11.7
E2-13	Water	Cont.	7	132	2	Gi	Gill	1190	1.0531	1190						11.07	11.3
E2-13	Water	Cont.	7	133	3	Gi	Gill	1200	1.0448	1200						10.2	10.9
E2-13	Water	Cont.	7	134	4	Gi	Gill	1210	1.0474	1210						9.08	10.5
E2-13	Water	Cont.	7	135	5	Gi	Gill	1220	1.048	1220						8.36	10.2
E2-13	Water	Cont.	7	136	6	Gi	Gill	1230	1.0452	1230						9.11	10.7
E2-13	Water	Cont.	24	137	1	Gi	Gill	1360	1.0488	1360	1.2671	0.2183	0.1		0	12.78	11.8		2013-02-27	2013-04-08	40	0.111734	0.511835	4.68769	6.32569
E2-13	Water	Cont.	24	138	2	Gi	Gill	1370	1.0546	1370	1.2756	0.221	0.4		0	8.81	10.8		2013-02-27	2013-04-08	40	0.446935	2.02233
E2-13	Water	Cont.	24	139	4	Gi	Gill	1380	1.0612	1380	1.2921	0.2309	2.6		0	10.5	11.1		2013-02-27	2013-04-08	40	2.90508	12.5815
E2-13	Water	Cont.	24	140	3	Gi	Gill	1390	1.0446	1390	1.2224	0.1778	0		0	7.35	9.8		2013-02-27	2013-04-08	40	0	0
E2-13	Water	Cont.	24	141	5	Gi	Gill	1400	1.0618	1400	1.2765	0.2147	2.5		0	8.42	10.5		2013-02-27	2013-04-08	40	2.79334	13.0104
E2-13	Water	Cont.	24	142	6	Gi	Gill	1410	1.0519	1410	1.2401	0.1882	0		0	8.41	10.5		2013-02-27	2013-04-08	40	0	0
E2-13	Water	Cont.	48	143	1	Gi	Gill	1540	1.061	1540	1.324	0.263	3.2		0	13.23	11.9		2013-02-27	2013-04-08	40	3.57548	13.595	6.71	6.31881
E2-13	Water	Cont.	48	144	2	Gi	Gill	1550	1.0595	1550	1.2915	0.232	2.7		0	10.1	10.8		2013-02-27	2013-04-08	40	3.01681	13.0035
E2-13	Water	Cont.	48	145	3	Gi	Gill	1560	1.0471	1560	1.3046	0.2575	0		0	10.87	11.2		2013-02-27	2013-04-08	40	0	0
E2-13	Water	Cont.	48	146	4	Gi	Gill	1570	1.0507	1570	1.2759	0.2252	0.7		0	12.43	11.8		2013-02-27	2013-04-08	40	0.782136	3.47307
E2-13	Water	Cont.	48	147	5	Gi	Gill	1580	1.0503	1580	1.1819	0.1316	1.2		0	6.71	9.6		2013-02-27	2013-04-08	40	1.3408	10.1885
E2-13	Water	Cont.	48	148	6	Gi	Gill	1590	1.0623	1590	1.1588	0.0965	0		0	3.48	7.7		2013-02-27	2013-04-08	40	0	0
E2-13	Water	S-Ag	3	149	1	Gi	Gill	1060	1.0449	1060	1.1733	0.1284	63.9			6.65	10.4		2013-02-27	2013-04-08	40	71.3978	556.058	594.456	133.435		231.691	247.69	55.5978	191.524	17.1714
E2-13	Water	S-Ag	3	150	2	Gi	Gill	1070	1.0428	1070	1.1911	0.1483	74.2			7.57	10.7		2013-02-27	2013-04-08	40	82.9064	559.045				232.935
E2-13	Water	S-Ag	3	151	3	Gi	Gill	1080	1.0449	1080	1.2375	0.1926	127.4			8.76	10.3		2013-02-27	2013-04-08	40	142.349	739.09				307.954
E2-13	Water	S-Ag	3	152	4	Gi	Gill	1090	1.0563	1090	1.2325	0.1762	121.2			8.64	10.1		2013-02-27	2013-04-08	40	135.421	768.565				320.236
E2-13	Water	S-Ag	3	153	5	Gi	Gill	1100	1.0477	1100	1.2306	0.1829	85.5			7.7	9.9		2013-02-27	2013-04-08	40	95.5323	522.32				217.633
E2-13	Water	S-Ag	3	154	6	Gi	Gill	1110	1.0457	1110	1.2455	0.1998	75.4			9.22	10.5		2013-02-27	2013-04-08	40	84.2472	421.658				175.691
E2-13	Water	S-Ag	7	155	1	Gi	Gill	1240	1.0375	1240	1.247	0.2095	93.1			10.24	10.8		2013-02-27	2013-04-08	40	104.024	496.535	506.795	148.038		206.89	211.165	61.6825
E2-13	Water	S-Ag	7	156	2	Gi	Gill	1250	1.0514	1250	1.2619	0.2105	49.1			7.02	9.6		2013-02-27	2013-04-08	40	54.8612	260.623				108.593
E2-13	Water	S-Ag	7	157	3	Gi	Gill	1260	1.0558	1260	1.3124	0.2566	118.5			10.27	10.9		2013-02-27	2013-04-08	40	132.404	515.995				214.998
E2-13	Water	S-Ag	7	158	4	Gi	Gill	1270	1.0548	1270	1.2682	0.2134	117.9			10.32	11		2013-02-27	2013-04-08	40	131.734	617.31				257.213
E2-13	Water	S-Ag	7	159	5	Gi	Gill	1280	1.0526	1280	1.3643	0.3117	127.9			12.32	11.2		2013-02-27	2013-04-08	40	142.907	458.477				191.032
E2-13	Water	S-Ag	7	160	6	Gi	Gill	1290	1.0389	1290	1.26	0.2211	136.9			10.32	10.5		2013-02-27	2013-04-08	40	152.963	691.829				288.262
E2-13	Water	S-Ag	24	161	1	Gi	Gill	1420	1.0588	1420	1.2361	0.1773	73			8.37	10.3		2013-02-27	2013-04-08	40	81.5656	460.043	410.365	56.8114		191.684	170.985	23.6714
E2-13	Water	S-Ag	24	162	2	Gi	Gill	1430	1.0598	1430	1.2979	0.2381	81			9.56	10.7		2013-02-27	2013-04-08	40	90.5043	380.11				158.379
E2-13	Water	S-Ag	24	163	3	Gi	Gill	1440	1.059	1440	1.2672	0.2082	89.8			7.74	10		2013-02-27	2013-04-08	40	100.337	481.925				200.802
E2-13	Water	S-Ag	24	164	4	Gi	Gill	1450	1.0492	1450	1.2808	0.2316	90.2			10.42	11.1		2013-02-27	2013-04-08	40	100.784	435.163				181.318
E2-13	Water	S-Ag	24	165	5	Gi	Gill	1460	1.0454	1460	1.2686	0.2232	67.9			8.77	11		2013-02-27	2013-04-08	40	75.8672	339.907				141.628
E2-13	Water	S-Ag	24	166	6	Gi	Gill	1470	1.0438	1470	1.3104	0.2666	87.1			10.78	11		2013-02-27	2013-04-08	40	97.32	365.041				152.101
E2-13	Water	S-Ag	48	167	1	Gi	Gill	1600	1.0535	1600	1.332	0.2785	100.8			11.45	11.5		2013-02-27	2013-04-08	40	112.628	404.408	327.013	132.523		168.503	136.255	55.218			1.36255	0.55218	x10_2
E2-13	Water	S-Ag	48	168	2	Gi	Gill	1610	1.0607	1610	1.2993	0.2386	39.5			9.73	10.7		2013-02-27	2013-04-08	40	44.1348	184.974				77.0725
E2-13	Water	S-Ag	48	169	3	Gi	Gill	1620	1.0513	1620	1.1946	0.1433	32.5			6.24	9		2013-02-27	2013-04-08	40	36.3134	253.409				105.587
E2-13	Water	S-Ag	48	170	4	Gi	Gill	1630	1.0498	1630	1.2869	0.2371	57.3			8.73	10.6		2013-02-27	2013-04-08	40	64.0234	270.027				112.511
E2-13	Water	S-Ag	48	171	5	Gi	Gill	1640	1.0632	1640	1.2102	0.147	73			8.56	10.2		2013-02-27	2013-04-08	40	81.5656	554.868				231.195
E2-13	Water	S-Ag	48	172	6	Gi	Gill	1650	1.0638	1650	1.2938	0.23	60.6			10.27	11.1		2013-02-27	2013-04-08	40	67.7106	294.394				122.664
E2-13	Water	Ag+	3	101	1	Ha	Heart	1124	1.0485	1124	1.0606	0.0121	0						2013-02-27	2014-03-25	26	0	0	38.3753	45.1191		0
E2-13	Water	Ag+	3	102	2	Ha	Heart	1134	1.0525	1134	1.0745	0.022	1.5						2013-02-27	2014-03-25	26	1.61217	73.2805				36.6402
E2-13	Water	Ag+	3	103	3	Ha	Heart	1144	1.0564	1144	1.0744	0.018	0						2013-02-27	2014-03-25	26	0	0				0
E2-13	Water	Ag+	3	104	4	Ha	Heart	1154	1.0474	1154	1.0694	0.022	0						2013-02-27	2014-03-25	26	0	0				0
E2-13	Water	Ag+	3	105	5	Ha	Heart	1164	1.055	1164	1.0715	0.0165	1.6						2013-02-27	2014-03-25	26	1.71965	104.221				52.1106
E2-13	Water	Ag+	3	106	6	Ha	Heart	1174	1.0586	1174	1.0749	0.0163	0.8						2013-02-27	2014-03-25	26	0.859824	52.7499				26.375
E2-13	Water	Ag+	7	107	1	Ha	Heart	1304	1.0532	1304	1.0689	0.0157	0						2013-02-27	2014-03-25	26	0	0	18.5052	45.3282		0
E2-13	Water	Ag+	7	108	2	Ha	Heart	1314	1.0468	1314	1.071	0.0242	2.5						2013-02-27	2014-03-25	26	2.68695	111.031				55.5155
E2-13	Water	Ag+	7	109	3	Ha	Heart	1324	1.0485	1324	1.0655	0.017	0						2013-02-27	2014-03-25	26	0	0				0
E2-13	Water	Ag+	7	110	4	Ha	Heart	1334	1.0521	1334	1.0841	0.032	0						2013-02-27	2014-03-25	26	0	0				0
E2-13	Water	Ag+	7	111	5	Ha	Heart	1344	1.053	1344	1.0685	0.0155	0						2013-02-27	2014-03-25	26	0	0				0
E2-13	Water	Ag+	7	112	6	Ha	Heart	1354	1.0558	1354	1.0779	0.0221	0						2013-02-27	2014-03-25	26	0	0				0
E2-13	Water	Ag+	24	113	1	Ha	Heart	1484	1.0547	1484	1.0738	0.0191	0						2013-02-27	2014-03-25	26	0	0	5.56881	13.6407		0
E2-13	Water	Ag+	24	114	2	Ha	Heart	1494	1.0527	1494	1.0789	0.0262	0						2013-02-27	2014-03-25	26	0	0				0
E2-13	Water	Ag+	24	115	3	Ha	Heart	1504	1.0623	1504	1.0789	0.0166	0						2013-02-27	2014-03-25	26	0	0				0
E2-13	Water	Ag+	24	116	4	Ha	Heart	1514	1.0501	1514	1.0686	0.0185	0						2013-02-27	2014-03-25	26	0	0				0
E2-13	Water	Ag+	24	117	5	Ha	Heart	1524	1.0545	1524	1.0715	0.017	0						2013-02-27	2014-03-25	26	0	0				0
E2-13	Water	Ag+	24	118	6	Ha	Heart	1534	1.0573	1534	1.0766	0.0193	0.6						2013-02-27	2014-03-25	26	0.644868	33.4129				16.7064
E2-13	Water	Ag+	48	119	1	Ha	Heart	1664	1.0508	1664	1.0661	0.0153	0						2013-02-27	2014-03-25	26	0	0	28.3116	38.4275		0
E2-13	Water	Ag+	48	120	2	Ha	Heart	1674	1.0607	1674	1.0791	0.0184	1.2						2013-02-27	2014-03-25	26	1.28974	70.0944				35.0472
E2-13	Water	Ag+	48	121	3	Ha	Heart	1684	1.0537	1684	1.0739	0.0202	0.3						2013-02-27	2014-03-25	26	0.322434	15.9621				7.98104
E2-13	Water	Ag+	48	122	4	Ha	Heart	1694	1.0518	1694	1.072	0.0202	0						2013-02-27	2014-03-25	26	0	0				0
E2-13	Water	Ag+	48	123	5	Ha	Heart	1704	1.06	1704	1.0818	0.0218	1.7						2013-02-27	2014-03-25	26	1.82713	83.8131				41.9066
E2-13	Water	Ag+	48	124	6	Ha	Heart	1714	1.0559	1714	1.0762	0.0203	0						2013-02-27	2014-03-25	26	0	0				0
E2-13	Water	Cont.	3	125	1	Ha	Heart	1004	1.0519	1004	1.0594	0.0075	0	0.216667	0				2013-02-27	2013-03-25	26	0	0	9.93459	15.5974
E2-13	Water	Cont.	3	126	2	Ha	Heart	1014	1.0525	1014	1.0833	0.0308	0		0				2013-02-27	2013-03-25	26	0	0
E2-13	Water	Cont.	3	127	3	Ha	Heart	1024	1.0479	1024	1.0674	0.0195	0.7		0				2013-02-27	2013-03-25	26	0.752346	38.5819
E2-13	Water	Cont.	3	128	4	Ha	Heart	1034	1.0433	1034	1.0742	0.0309	0.1		0				2013-02-27	2013-03-25	26	0.107478	3.47825
E2-13	Water	Cont.	3	129	5	Ha	Heart	1044	1.0468	1044	1.0643	0.0175	0		0				2013-02-27	2013-03-25	26	0	0
E2-13	Water	Cont.	3	130	6	Ha	Heart	1054	1.0556	1054	1.0801	0.0245	0.4		0				2013-02-27	2013-03-25	26	0.429912	17.5474
E2-13	Water	Cont.	7	131	1	Ha	Heart	1184	1.0467	1184
E2-13	Water	Cont.	7	132	2	Ha	Heart	1194	1.0532	1194
E2-13	Water	Cont.	7	133	3	Ha	Heart	1204	1.0526	1204
E2-13	Water	Cont.	7	134	4	Ha	Heart	1214	1.0534	1214
E2-13	Water	Cont.	7	135	5	Ha	Heart	1224	1.053	1224
E2-13	Water	Cont.	7	136	6	Ha	Heart	1234	1.0474	1234
E2-13	Water	Cont.	24	137	1	Ha	Heart	1364	1.0499	1364	1.0749	0.025	0		0				2013-02-27	2013-03-25	26	0	0	48.6027	105.532
E2-13	Water	Cont.	24	138	2	Ha	Heart	1374	1.044	1374	1.053	0.009	2.2		0				2013-02-27	2013-03-25	26	2.36452	262.724
E2-13	Water	Cont.	24	139	4	Ha	Heart	1384	1.0622	1384	1.0722	0.01	0		0				2013-02-27	2013-03-25	26	0	0
E2-13	Water	Cont.	24	140	3	Ha	Heart	1394	1.0503	1394	1.0744	0.0241	0		0				2013-02-27	2013-03-25	26	0	0
E2-13	Water	Cont.	24	141	5	Ha	Heart	1404	1.0515	1404	1.0701	0.0186	0.5		0				2013-02-27	2013-03-25	26	0.53739	28.8919
E2-13	Water	Cont.	24	142	6	Ha	Heart	1414	1.048	1414	1.0633	0.0153	0		0				2013-02-27	2013-03-25	26	0	0
E2-13	Water	Cont.	48	143	1	Ha	Heart	1544	1.0604	1544	1.0884	0.028	0		0				2013-02-27	2013-03-25	26	0	0	0	0
E2-13	Water	Cont.	48	144	2	Ha	Heart	1554	1.049	1554	1.0687	0.0197	0		0				2013-02-27	2013-03-25	26	0	0
E2-13	Water	Cont.	48	145	3	Ha	Heart	1564	1.0463	1564	1.0747	0.0284	0		0				2013-02-27	2013-03-25	26	0	0
E2-13	Water	Cont.	48	146	4	Ha	Heart	1574	1.0461	1574	1.0692	0.0231	0		0				2013-02-27	2013-03-25	26	0	0
E2-13	Water	Cont.	48	147	5	Ha	Heart	1584	1.0479	1584	1.0643	0.0164	0		0				2013-02-27	2013-03-25	26	0	0
E2-13	Water	Cont.	48	148	6	Ha	Heart	1594	1.058	1594	1.0668	0.0088	0		0				2013-02-27	2013-03-25	26	0	0
E2-13	Water	S-Ag	3	149	1	Ha	Heart	1064	1.0404	1064	1.0491	0.0087	0						2013-02-27	2014-03-25	26	0	0	98.8214	132.34		0
E2-13	Water	S-Ag	3	150	2	Ha	Heart	1074	1.0436	1074	1.0584	0.0148	3.9						2013-02-27	2014-03-25	26	4.19164	283.219				118.008
E2-13	Water	S-Ag	3	151	3	Ha	Heart	1084	1.0493	1084	1.0636	0.0143	0						2013-02-27	2014-03-25	26	0	0				0
E2-13	Water	S-Ag	3	152	4	Ha	Heart	1094	1.045	1094	1.0647	0.0197	1.1						2013-02-27	2014-03-25	26	1.18226	60.0131				25.0055
E2-13	Water	S-Ag	3	153	5	Ha	Heart	1104	1.0466	1104	1.0672	0.0206	0						2013-02-27	2014-03-25	26	0	0				0
E2-13	Water	S-Ag	3	154	6	Ha	Heart	1114	1.0476	1114	1.0674	0.0198	4.6						2013-02-27	2014-03-25	26	4.94399	249.696				104.04
E2-13	Water	S-Ag	7	155	1	Ha	Heart	1244	1.0475	1244	1.0663	0.0188	0						2013-02-27	2014-03-25	26	0	0	91.0578	201.902		0
E2-13	Water	S-Ag	7	156	2	Ha	Heart	1254	1.055	1254	1.058	0.003	1.4						2013-02-27	2014-03-25	26	1.50469	501.564				208.985
E2-13	Water	S-Ag	7	157	3	Ha	Heart	1264	1.0521	1264	1.0727	0.0206	0						2013-02-27	2014-03-25	26	0	0				0
E2-13	Water	S-Ag	7	158	4	Ha	Heart	1274	1.049	1274	1.0706	0.0216	0.9						2013-02-27	2014-03-25	26	0.967302	44.7825				18.6594
E2-13	Water	S-Ag	7	159	5	Ha	Heart	1284	1.0556	1284	1.0939	0.0383	0						2013-02-27	2014-03-25	26	0	0				0
E2-13	Water	S-Ag	7	160	6	Ha	Heart	1294	1.0448	1294	1.0678	0.023	0						2013-02-27	2014-03-25	26	0	0				0
E2-13	Water	S-Ag	24	161	1	Ha	Heart	1424	1.0448	1424	1.058	0.0132	3.4						2013-02-27	2014-03-25	26	3.65425	276.837	73.7958	115.434		115.349
E2-13	Water	S-Ag	24	162	2	Ha	Heart	1434	1.0552	1434	1.0729	0.0177	0						2013-02-27	2014-03-25	26	0	0				0
E2-13	Water	S-Ag	24	163	3	Ha	Heart	1444	1.0623	1444	1.0781	0.0158	2.2						2013-02-27	2014-03-25	26	2.36452	149.653				62.3554
E2-13	Water	S-Ag	24	164	4	Ha	Heart	1454	1.0571	1454	1.0769	0.0198	0.3						2013-02-27	2014-03-25	26	0.322434	16.2845				6.78523
E2-13	Water	S-Ag	24	165	5	Ha	Heart	1464	1.0547	1464	1.0733	0.0186	0						2013-02-27	2014-03-25	26	0	0				0
E2-13	Water	S-Ag	24	166	6	Ha	Heart	1474	1.042	1474	1.075	0.033	0						2013-02-27	2014-03-25	26	0	0				0
E2-13	Water	S-Ag	48	167	1	Ha	Heart	1604	1.0512	1604	1.0796	0.0284	0						2013-02-27	2014-03-25	26	0	0	9.57178	20.4045		0
E2-13	Water	S-Ag	48	168	2	Ha	Heart	1614	1.0516	1614	1.0758	0.0242	0						2013-02-27	2014-03-25	26	0	0				0
E2-13	Water	S-Ag	48	169	3	Ha	Heart	1624	1.0418	1624	1.0539	0.0121	0						2013-02-27	2014-03-25	26	0	0				0
E2-13	Water	S-Ag	48	170	4	Ha	Heart	1634	1.0531	1634	1.07	0.0169	0.8						2013-02-27	2014-03-25	26	0.859824	50.8772				21.1988
E2-13	Water	S-Ag	48	171	5	Ha	Heart	1644	1.06	1644	1.0764	0.0164	0.1						2013-02-27	2014-03-25	26	0.107478	6.55354				2.73064
E2-13	Water	S-Ag	48	172	6	Ha	Heart	1654	1.0576	1654	1.0682	0.0106	0						2013-02-27	2014-03-25	26	0	0				0
E2-13	Water	Ag+	3	101	1	Int.	Intestines	1125	1.0481	1125	1.2947	0.2466	2.6						2013-02-27	2013-04-05	37	2.881	11.6829	16.941	18.4486		5.84145
E2-13	Water	Ag+	3	102	2	Int.	Intestines	1135	1.0527	1135	1.475	0.4223	0.8						2013-02-27	2013-04-05	37	0.886462	2.09913				1.04956
E2-13	Water	Ag+	3	103	3	Int.	Intestines	1145	1.0523	1145	1.2339	0.1816	4						2013-02-27	2013-04-05	37	4.43231	24.407				12.2035
E2-13	Water	Ag+	3	104	4	Int.	Intestines	1155	1.0424	1155	1.4667	0.4243	0						2013-02-27	2013-04-05	37	0	0				0
E2-13	Water	Ag+	3	105	5	Int.	Intestines	1165	1.0582	1165	1.1644	0.1062	4.8						2013-02-27	2013-04-05	37	5.31877	50.0826				25.0413
E2-13	Water	Ag+	3	106	6	Int.	Intestines	1175	1.0527	1175	1.3841	0.3314	4						2013-02-27	2013-04-05	37	4.43231	13.3745				6.68725
E2-13	Water	Ag+	7	107	1	Int.	Intestines	1305	1.0543	1305	1.325	0.2707	3.6						2013-02-27	2013-04-05	37	3.98908	14.7362	7.19629	7.76555		7.36808
E2-13	Water	Ag+	7	108	2	Int.	Intestines	1315	1.0551	1315	1.3684	0.3133	0						2013-02-27	2013-04-05	37	0	0				0
E2-13	Water	Ag+	7	109	3	Int.	Intestines	1325	1.0547	1325	1.4471	0.3924	0.6						2013-02-27	2013-04-05	37	0.664847	1.69431				0.847154
E2-13	Water	Ag+	7	110	4	Int.	Intestines	1335	1.0372	1335	1.4801	0.4429	0						2013-02-27	2013-04-05	37	0	0				0
E2-13	Water	Ag+	7	111	5	Int.	Intestines	1345	1.0389	1345	1.4355	0.3966	3.3						2013-02-27	2013-04-05	37	3.65666	9.22001				4.61001
E2-13	Water	Ag+	7	112	6	Int.	Intestines	1355	1.0579	1355	1.4309	0.373	5.9						2013-02-27	2013-04-05	37	6.53766	17.5272				8.76362
E2-13	Water	Ag+	24	113	1	Int.	Intestines	1485	1.0482	1485	1.5867	0.5385	3.5						2013-02-27	2013-04-05	37	3.87827	7.20199	18.5584	8.90399		3.601
E2-13	Water	Ag+	24	114	2	Int.	Intestines	1495	1.0566	1495	1.7414	0.6848	12.8						2013-02-27	2013-04-05	37	14.1834	20.7117				10.3559
E2-13	Water	Ag+	24	115	3	Int.	Intestines	1505	1.0559	1505	1.3552	0.2993	3.7						2013-02-27	2013-04-05	37	4.09989	13.6983				6.84913
E2-13	Water	Ag+	24	116	4	Int.	Intestines	1515	1.0489	1515	1.6462	0.5973	7.8						2013-02-27	2013-04-05	37	8.64301	14.4701				7.23506
E2-13	Water	Ag+	24	117	5	Int.	Intestines	1525	1.0629	1525	1.4163	0.3534	7.1						2013-02-27	2013-04-05	37	7.86735	22.2619				11.1309
E2-13	Water	Ag+	24	118	6	Int.	Intestines	1535	1.0552	1535	1.3607	0.3055	9.1						2013-02-27	2013-04-05	37	10.0835	33.0066				16.5033
E2-13	Water	Ag+	48	119	1	Int.	Intestines	1665	1.0562	1665	1.4561	0.3999	6.7						2013-02-27	2013-04-05	37	7.42412	18.5649	23.5211	5.07366		9.28247
E2-13	Water	Ag+	48	120	2	Int.	Intestines	1675	1.0579	1675	1.54	0.4821	7.1						2013-02-27	2013-04-05	37	7.86735	16.3189				8.15946
E2-13	Water	Ag+	48	121	3	Int.	Intestines	1685	1.0576	1685	1.3862	0.3286	7.9						2013-02-27	2013-04-05	37	8.75381	26.6397				13.3199
E2-13	Water	Ag+	48	122	4	Int.	Intestines	1695	1.0509	1695	1.474	0.4231	9.3						2013-02-27	2013-04-05	37	10.3051	24.3562				12.1781
E2-13	Water	Ag+	48	123	5	Int.	Intestines	1705	1.0623	1705	1.6304	0.5681	15.2						2013-02-27	2013-04-05	37	16.8428	29.6476				14.8238
E2-13	Water	Ag+	48	124	6	Int.	Intestines	1715	1.0559	1715	1.3589	0.303	7						2013-02-27	2013-04-05	37	7.75654	25.5992				12.7996
E2-13	Water	Cont.	3	125	1	Int.	Intestines	1005	1.0486	1005	1.48	0.4314	0	0.622222	0				2013-02-27	2013-04-05	37	0	0	2.81997	3.80543
E2-13	Water	Cont.	3	126	2	Int.	Intestines	1015	1.0404	1015	1.5458	0.5054	1.4		0				2013-02-27	2013-04-05	37	1.55131	3.06947
E2-13	Water	Cont.	3	127	3	Int.	Intestines	1025	1.0463	1025	1.5977	0.5514	0		0				2013-02-27	2013-04-05	37	0	0
E2-13	Water	Cont.	3	128	4	Int.	Intestines	1035	1.0386	1035	1.5159	0.4773	0		0				2013-02-27	2013-04-05	37	0	0
E2-13	Water	Cont.	3	129	5	Int.	Intestines	1045	1.0549	1045	1.5554	0.5005	1.9		0				2013-02-27	2013-04-05	37	2.10535	4.20649
E2-13	Water	Cont.	3	130	6	Int.	Intestines	1055	1.057	1055	1.4017	0.3447	3		0				2013-02-27	2013-04-05	37	3.32423	9.64385
E2-13	Water	Cont.	7	131	1	Int.	Intestines	1185	1.0539	1185
E2-13	Water	Cont.	7	132	2	Int.	Intestines	1195	1.047	1195
E2-13	Water	Cont.	7	133	3	Int.	Intestines	1205	1.0397	1205
E2-13	Water	Cont.	7	134	4	Int.	Intestines	1215	1.045	1215
E2-13	Water	Cont.	7	135	5	Int.	Intestines	1225	1.0475	1225
E2-13	Water	Cont.	7	136	6	Int.	Intestines	1235	1.0463	1235
E2-13	Water	Cont.	24	137	1	Int.	Intestines	1365	1.0617	1365	1.9855	0.9238	0		0				2013-02-27	2013-04-05	37	0	0	0.870337	1.92709
E2-13	Water	Cont.	24	138	2	Int.	Intestines	1375	1.0513	1375	1.6017	0.5504	0		0				2013-02-27	2013-04-05	37	0	0
E2-13	Water	Cont.	24	139	4	Int.	Intestines	1385	1.0472	1385	1.5332	0.486	2.1		0				2013-02-27	2013-04-05	37	2.32696	4.78799
E2-13	Water	Cont.	24	140	3	Int.	Intestines	1395	1.0574	1395	1.3835	0.3261	0		0				2013-02-27	2013-04-05	37	0	0
E2-13	Water	Cont.	24	141	5	Int.	Intestines	1402	1.0528	1402	1.585	0.5322	0		0				2013-02-27	2013-04-05	37	0	0
E2-13	Water	Cont.	24	142	6	Int.	Intestines	1415	1.0617	1415	1.5723	0.5106	0.2		0				2013-02-27	2013-04-05	37	0.221616	0.43403
E2-13	Water	Cont.	48	143	1	Int.	Intestines	1545	1.0556	1545	1.8724	0.8168	0		0				2013-02-27	2013-04-05	37	0	0	2.31292	4.77199
E2-13	Water	Cont.	48	144	2	Int.	Intestines	1555	1.0487	1555	1.4704	0.4217	0		0				2013-02-27	2013-04-05	37	0	0
E2-13	Water	Cont.	48	145	3	Int.	Intestines	1565	1.0548	1565	1.5081	0.4533	0.8		0				2013-02-27	2013-04-05	37	0.886462	1.95558
E2-13	Water	Cont.	48	146	4	Int.	Intestines	1575	1.051	1575	1.828	0.777	0		0				2013-02-27	2013-04-05	37	0	0
E2-13	Water	Cont.	48	147	5	Int.	Intestines	1585	1.0631	1585	1.4745	0.4114	0		0				2013-02-27	2013-04-05	37	0	0
E2-13	Water	Cont.	48	148	6	Int.	Intestines	1595	1.0416	1595	1.2089	0.1673	1.8		0				2013-02-27	2013-04-05	37	1.99454	11.9219
E2-13	Water	P-Ag	7	149	1	Bi	Bile	1723	1.0475	1723	1.0653	0.0178	0						2013-02-27			0	0
E2-13	Water	P-Ag	7	150	2	Bi	Bile	1733	1.0493	1733	1.0863	0.037	3						2013-02-27			3	81.0811
E2-13	Water	P-Ag	7	151	3	Bi	Bile	1743	1.0562	1743	1.0893	0.0331	0						2013-02-27			0	0
E2-13	Water	P-Ag	7	152	4	Bi	Bile	1753	1.0546	1753	1.0892	0.0346	0.7						2013-02-27			0.7	20.2312
E2-13	Water	P-Ag	7	153	5	Bi	Bile	1763	1.0616	1763	1.1067	0.0451	0						2013-02-27			0	0
E2-13	Water	P-Ag	7	154	6	Bi	Bile	1773	1.0585	1773	1.0904	0.0319	0.5						2013-02-27			0.5	15.674
E2-13	Water	P-Ag	24	155	1	Bi	Bile	1783	1.052	1783	1.0885	0.0365	0.9						2013-02-27			0.9	24.6575
E2-13	Water	P-Ag	24	156	2	Bi	Bile	1793	1.0602	1793	1.1074	0.0472	9.5						2013-02-27			9.5	201.271
E2-13	Water	P-Ag	24	157	3	Bi	Bile	1803	1.0598	1803	1.1005	0.0407	6.6						2013-02-27			6.6	162.162
E2-13	Water	P-Ag	24	158	4	Bi	Bile	1813	1.0573	1813	1.0994	0.0421	6.4						2013-02-27			6.4	152.019
E2-13	Water	P-Ag	24	159	5	Bi	Bile	1823	1.0508	1823	1.0841	0.0333	7.6						2013-02-27			7.6	228.228
E2-13	Water	P-Ag	24	160	6	Bi	Bile	1833	1.0565	1833	1.0794	0.0229	0.7						2013-02-27			0.7	30.5677
E2-13	Water	P-Ag	7	161	1	Bl	Blood	1727	1.0612	1727									2013-02-27			0	#DIV/0!
E2-13	Water	P-Ag	7	162	2	Bl	Blood	1737	1.0544	1737									2013-02-27			0	#DIV/0!
E2-13	Water	P-Ag	7	163	3	Bl	Blood	1747	1.0619	1747									2013-02-27			0	#DIV/0!
E2-13	Water	P-Ag	7	164	4	Bl	Blood	1757	1.0577	1757									2013-02-27			0	#DIV/0!
E2-13	Water	P-Ag	7	165	5	Bl	Blood	1767	1.061	1767									2013-02-27			0	#DIV/0!
E2-13	Water	P-Ag	7	166	6	Bl	Blood	1777	1.0491	1777									2013-02-27			0	#DIV/0!
E2-13	Water	P-Ag	24	167	1	Bl	Blood	1787	1.0604	1787									2013-02-27			0	#DIV/0!
E2-13	Water	P-Ag	24	168	2	Bl	Blood	1797	1.0507	1797									2013-02-27			0	#DIV/0!
E2-13	Water	P-Ag	24	169	3	Bl	Blood	1807	1.0572	1807									2013-02-27			0	#DIV/0!
E2-13	Water	P-Ag	24	170	4	Bl	Blood	1817	1.0571	1817									2013-02-27			0	#DIV/0!
E2-13	Water	P-Ag	24	171	5	Bl	Blood	1827	1.0617	1827									2013-02-27			0	#DIV/0!
E2-13	Water	P-Ag	24	172	6	Bl	Blood	1837	1.0613	1837									2013-02-27			0	#DIV/0!
E2-13	Water	P-Ag	7	101	1	Br	Brain	1726	1.0514	1726	1.1224	0.071	0						2013-02-27			0	0
E2-13	Water	P-Ag	7	102	2	Br	Brain	1736	1.0547	1736	1.1312	0.0765	0						2013-02-27			0	0
E2-13	Water	P-Ag	7	103	3	Br	Brain	1746	1.0498	1746	1.1189	0.0691	0						2013-02-27			0	0
E2-13	Water	P-Ag	7	104	4	Br	Brain	1756	1.0545	1756	1.1074	0.0529	2.9						2013-02-27			2.9	54.8204
E2-13	Water	P-Ag	7	105	5	Br	Brain	1766	1.0615	1766	1.1496	0.0881	0						2013-02-27			0	0
E2-13	Water	P-Ag	7	106	6	Br	Brain	1776	1.0583	1776	1.1132	0.0549	0						2013-02-27			0	0
E2-13	Water	P-Ag	24	107	1	Br	Brain	1786	1.057	1786	1.1113	0.0543	0						2013-02-27			0	0
E2-13	Water	P-Ag	24	108	2	Br	Brain	1796	1.0505	1796	1.1103	0.0598	0						2013-02-27			0	0
E2-13	Water	P-Ag	24	109	3	Br	Brain	1806	1.0484	1806	1.1099	0.0615	0						2013-02-27			0	0
	Water	P-Ag	24	110	4	Br	Brain	1816	1.0549	1816	1.1426	0.0877	0						2013-02-27			0	0
E2-13	Water	P-Ag	24	111	5	Br	Brain	1826	1.0491	1826	1.1152	0.0661	0						2013-02-27			0	0
E2-13	Water	P-Ag	24	112	6	Br	Brain	1836	0.0556	1836	1.1162	1.0606	0						2013-02-27			0	0
E2-13	Water	P-Ag	7	113	1	GC	GC	1729	1.0561	1729	1.1382	0.0821	3						2013-02-27			3	36.5408
E2-13	Water	P-Ag	7	114	2	GC	GC	1739	1.0493	1739	1.0728	0.0235	0						2013-02-27			0	0
E2-13	Water	P-Ag	7	115	3	GC	GC	1749	1.0502	1749	1.0703	0.0201	0						2013-02-27			0	0
E2-13	Water	P-Ag	7	116	4	GC	GC	1759	1.0483	1759	1.0912	0.0429	0						2013-02-27			0	0
E2-13	Water	P-Ag	7	117	5	GC	GC	1769	1.0545	1769	1.0925	0.038	1.5						2013-02-27			1.5	39.4737
E2-13	Water	P-Ag	7	118	6	GC	GC	1779	1.0575	1779	1.0751	0.0176	1.4						2013-02-27			1.4	79.5455
E2-13	Water	P-Ag	24	119	1	GC	GC	1789	1.0547	1789	1.0656	0.0109	1.5						2013-02-27			1.5	137.615
E2-13	Water	P-Ag	24	120	2	GC	GC	1799	1.0507	1799	1.0806	0.0299	2.9						2013-02-27			2.9	96.99
E2-13	Water	P-Ag	24	121	3	GC	GC	1809	1.0508	1809	1.0578	0.007	0.4						2013-02-27			0.4	57.1429
E2-13	Water	P-Ag	24	122	4	GC	GC	1819	1.0557	1819	1.0972	0.0415	1.2						2013-02-27			1.2	28.9157
E2-13	Water	P-Ag	24	123	5	GC	GC	1829	1.0611	1829	1.0896	0.0285	0						2013-02-27			0	0
E2-13	Water	P-Ag	24	124	6	GC	GC	1839	1.0506	1839	1.0656	0.015	0						2013-02-27			0	0
E2-13	Water	P-Ag	7	125	1	Gi	Gill	1720	1.0475	1720	1.1977	0.1502	120.8			7.7	11		2013-02-27			120.8	804.261
E2-13	Water	P-Ag	7	126	2	Gi	Gill	1730	1.0611	1730	1.2411	0.18	105.6			8.51	11.6		2013-02-27			105.6	586.667
E2-13	Water	P-Ag	7	127	3	Gi	Gill	1740	1.0516	1740	1.2826	0.231	176.8			9.02	11.7		2013-02-27			176.8	765.368
E2-13	Water	P-Ag	7	128	4	Gi	Gill	1750	1.0492	1750	1.2751	0.2259	136.2			10.72	11.9		2013-02-27			136.2	602.922
E2-13	Water	P-Ag	7	129	5	Gi	Gill	1760	1.0572	1760	1.2957	0.2385	167.1			10.53	12		2013-02-27			167.1	700.629
o	Water	P-Ag	7	130	6	Gi	Gill	1770	1.0539	1770	1.2747	0.2208	176.7			9.02	11.7		2013-02-27			176.7	800.272
E2-13	Water	P-Ag	24	131	1	Gi	Gill	1780	1.0615	1780	1.2265	0.165	116.5			8.65	10		2013-02-27			116.5	706.061
E2-13	Water	P-Ag	24	132	2	Gi	Gill	1790	1.0498	1790	1.2973	0.2475	131.7			8.93	9.8		2013-02-27			131.7	532.121
E2-13	Water	P-Ag	24	133	3	Gi	Gill	1800	1.044	1800	1.2202	0.1762	120.3			7.25	9.8		2013-02-27			120.3	682.747
E2-13	Water	P-Ag	24	134	4	Gi	Gill	1810	1.0587	1810	1.4014	0.3427	169.2			13.99	12.2		2013-02-27			169.2	493.726
E2-13	Water	P-Ag	24	135	5	Gi	Gill	1820	1.044	1820	1.2081	0.1641	95.6			7.94	10.2		2013-02-27			95.6	582.572
E2-13	Water	P-Ag	24	136	6	Gi	Gill	1830	1.0542	1830	1.1682	0.114	61.3			6.49	9.5		2013-02-27			61.3	537.719
E2-13	Water	P-Ag	7	137	1	Ha	Heart	1724	1.0606	1724	1.0759	0.0153	0						2013-02-27			0	0
E2-13	Water	P-Ag	7	138	2	Ha	Heart	1734	1.0602	1734	1.0847	0.0245	0						2013-02-27			0	0
E2-13	Water	P-Ag	7	139	3	Ha	Heart	1744	1.0471	1744	1.0684	0.0213	0						2013-02-27			0	0
E2-13	Water	P-Ag	7	140	4	Ha	Heart	1754	1.0507	1754	1.0749	0.0242	0						2013-02-27			0	0
E2-13	Water	P-Ag	7	141	5	Ha	Heart	1764	1.056	1764	1.0811	0.0251	0						2013-02-27			0	0
E2-13	Water	P-Ag	7	142	6	Ha	Heart	1774	1.0438	1774	1.0605	0.0167	0						2013-02-27			0	0
E2-13	Water	P-Ag	24	143	1	Ha	Heart	1784	1.0618	1784	1.0759	0.0141	0						2013-02-27			0	0
E2-13	Water	P-Ag	24	144	2	Ha	Heart	1794	1.0609	1794	1.0791	0.0182	0						2013-02-27			0	0
E2-13	Water	P-Ag	24	145	3	Ha	Heart	1804	1.0594	1804	1.0761	0.0167	0						2013-02-27			0	0
E2-13	Water	P-Ag	24	146	4	Ha	Heart	1814	1.0594	1814	1.0891	0.0297	0.2						2013-02-27			0.2	6.73401
E2-13	Water	P-Ag	24	147	5	Ha	Heart	1824	1.0421	1824	1.0585	0.0164	0						2013-02-27			0	0
E2-13	Water	P-Ag	24	148	6	Ha	Heart	1834	1.0558	1834	1.0684	0.0126	0.6						2013-02-27			0.6	47.619
E2-13	Water	P-Ag	7	149	1	Int.	Intestines	1725	1.0429	1725	1.3095	0.2666	2.5						2013-02-27			2.5	9.37734
E2-13	Water	P-Ag	7	150	2	Int.	Intestines	1735	1.0572	1735	1.3807	0.3235	0						2013-02-27			0	0
E2-13	Water	P-Ag	7	151	3	Int.	Intestines	1745	1.0544	1745	1.42	0.3656	4.7						2013-02-27			4.7	12.8556
E2-13	Water	P-Ag	7	152	4	Int.	Intestines	1755	1.055	1755	1.5581	0.5031	0						2013-02-27			0	0
E2-13	Water	P-Ag	7	153	5	Int.	Intestines	1765	1.0517	1765	1.4452	0.3935	0						2013-02-27			0	0
E2-13	Water	P-Ag	7	154	6	Int.	Intestines	1775	1.0546	1775	1.4148	0.3602	3.2						2013-02-27			3.2	8.88395
E2-13	Water	P-Ag	24	155	1	Int.	Intestines	1785	1.0618	1785	1.5913	0.5295	4.2						2013-02-27			4.2	7.93201
E2-13	Water	P-Ag	24	156	2	Int.	Intestines	1795	1.0552	1795	1.5027	0.4475	8.5						2013-02-27			8.5	18.9944
E2-13	Water	P-Ag	24	157	3	Int.	Intestines	1805	1.0555	1805	1.3563	0.3008	2.6						2013-02-27			2.6	8.64362
E2-13	Water	P-Ag	24	158	4	Int.	Intestines	1815	1.0514	1815	1.935	0.8836	3.5						2013-02-27			3.5	3.96107
E2-13	Water	P-Ag	24	159	5	Int.	Intestines	1825	1.0537	1825	1.6236	0.5699	5.8						2013-02-27			5.8	10.1772
E2-13	Water	P-Ag	24	160	6	Int.	Intestines	1835	1.0478	1835	1.3686	0.3208	2.3						2013-02-27			2.3	7.16958
E2-13	Water	P-Ag	7	161	1	Ki	Kidney	1722	1.0519	1722	1.1274	0.0755	0.1						2013-02-27			0.1	1.3245
E2-13	Water	P-Ag	7	162	2	Ki	Kidney	1732	1.0435	1732	1.1082	0.0647	0						2013-02-27			0	0
E2-13	Water	P-Ag	7	163	3	Ki	Kidney	1742	1.0524	1742	1.1257	0.0733	0						2013-02-27			0	0
E2-13	Water	P-Ag	7	164	4	Ki	Kidney	1752	1.0569	1752	1.1138	0.0569	0						2013-02-27			0	0
E2-13	Water	P-Ag	7	165	5	Ki	Kidney	1762	1.05	1762	1.1018	0.0518	1.1						2013-02-27			1.1	21.2355
E2-13	Water	P-Ag	7	166	6	Ki	Kidney	1772	1.0576	1772	1.123	0.0654	0						2013-02-27			0	0
E2-13	Water	P-Ag	24	167	1	Ki	Kidney	1782	1.0492	1782	1.0853	0.0361	0						2013-02-27			0	0
E2-13	Water	P-Ag	24	168	2	Ki	Kidney	1792	1.0533	1792	1.1251	0.0718	5.4						2013-02-27			5.4	75.2089
E2-13	Water	P-Ag	24	169	3	Ki	Kidney	1802	1.0478	1802	1.085	0.0372	5						2013-02-27			5	134.409
E2-13	Water	P-Ag	24	170	4	Ki	Kidney	1812	1.0604	1812	1.1837	0.1233	1						2013-02-27			1	8.1103
E2-13	Water	P-Ag	24	171	5	Ki	Kidney	1822	1.0516	1822	1.0954	0.0438	0						2013-02-27			0	0
E2-13	Water	P-Ag	24	172	6	Ki	Kidney	1832	1.0491	1832	1.0731	0.024	0.1						2013-02-27			0.1	4.16667
E2-13	Water	P-Ag	7	101	1	Li	Liver	1721	1.0558	1721	1.177	0.1212	19						2013-02-27			19	156.766
E2-13	Water	P-Ag	7	102	2	Li	Liver	1731	1.0431	1731	1.1447	0.1016	14.9						2013-02-27			14.9	146.654
E2-13	Water	P-Ag	7	103	3	Li	Liver	1748	1.0544	1748	1.1458	0.0914	10						2013-02-27			10	109.409
E2-13	Water	P-Ag	7	104	4	Li	Liver	1751	1.0573	1751	1.1615	0.1042	9.4						2013-02-27			9.4	90.2111
E2-13	Water	P-Ag	7	105	5	Li	Liver	1761	1.057	1761	1.1653	0.1083	12.6						2013-02-27			12.6	116.343
E2-13	Water	P-Ag	7	106	6	Li	Liver	1771	1.0494	1771	1.1413	0.0919	6.4						2013-02-27			6.4	69.6409
E2-13	Water	P-Ag	24	107	1	Li	Liver	1781	1.0623	1781	1.147	0.0847	30.2						2013-02-27			30.2	356.553
E2-13	Water	P-Ag	24	108	2	Li	Liver	1791	1.0599	1791	1.1598	0.0999	43.5						2013-02-27			43.5	435.435
E2-13	Water	P-Ag	24	109	3	Li	Liver	1801	1.0613	1801	1.1241	0.0628	22.3						2013-02-27			22.3	355.096
E2-13	Water	P-Ag	24	110	4	Li	Liver	1811	1.0576	1811	1.2609	0.2033	92.4						2013-02-27			92.4	454.501
E2-13	Water	P-Ag	24	111	5	Li	Liver	1821	1.0539	1821	1.1455	0.0916	33						2013-02-27			33	360.262
E2-13	Water	P-Ag	24	112	6	Li	Liver	1831	1.0468	1831	1.1228	0.076	15.8						2013-02-27			15.8	207.895
E2-13	Water	P-Ag	7	113	1	Mi	Spleen	1728	1.0551	1728	1.0657	0.0106	0						2013-02-27			0	0
E2-13	Water	P-Ag	7	114	2	Mi	Spleen	1738	1.0484	1738	1.0584	0.01	0						2013-02-27			0	0
E2-13	Water	P-Ag	7	115	3	Mi	Spleen	1741	1.0547	1741	1.0612	0.0065	1.4						2013-02-27			1.4	215.385
E2-13	Water	P-Ag	7	116	4	Mi	Spleen	1758	1.0514	1758	1.062	0.0106	2.5						2013-02-27			2.5	235.849
E2-13	Water	P-Ag	7	117	5	Mi	Spleen	1768	1.0529	1768	1.0622	0.0093	0						2013-02-27			0	0
E2-13	Water	P-Ag	7	118	6	Mi	Spleen	1778	1.0496	1778	1.0598	0.0102	0						2013-02-27			0	0
E2-13	Water	P-Ag	24	119	1	Mi	Spleen	1788	1.0511	1788	1.057	0.0059	0						2013-02-27			0	0
E2-13	Water	P-Ag	24	120	2	Mi	Spleen	1798	1.0556	1798	1.0656	0.01	0.4						2013-02-27			0.4	40
E2-13	Water	P-Ag	24	121	3	Mi	Spleen	1808	1.0506	1808	1.0559	0.0053	0						2013-02-27			0	0
E2-13	Water	P-Ag	24	122	4	Mi	Spleen	1818	1.0563	1818	1.0714	0.0151	0.5						2013-02-27			0.5	33.1126
E2-13	Water	P-Ag	24	123	5	Mi	Spleen	1828	1.0603	1828	1.0705	0.0102	1.6						2013-02-27			1.6	156.863
E2-13	Water	P-Ag	24	124	6	Mi	Spleen	1838	1.0587	1838	1.0627	0.004	0						2013-02-27			0	0
E2-13	Water	S-Ag	3	125	1	Int.	Intestines	1065	1.0484	1065	1.424	0.3756	0.3						2013-02-27	2013-04-05	37	0.332423	0.885046	3.77527	3.14053		0.368769
E2-13	Water	S-Ag	3	126	2	Int.	Intestines	1075	1.0462	1075	1.3543	0.3081	2.3						2013-02-27	2013-04-05	37	2.54858	8.27192				3.44663
E2-13	Water	S-Ag	3	127	3	Int.	Intestines	1085	1.0433	1085	1.4564	0.4131	0.9						2013-02-27	2013-04-05	37	0.99727	2.41411				1.00588
E2-13	Water	S-Ag	3	128	4	Int.	Intestines	1095	1.0443	1095	1.6018	0.5575	0.6						2013-02-27	2013-04-05	37	0.664847	1.19255				0.496896
E2-13	Water	S-Ag	3	129	5	Int.	Intestines	1105	1.0468	1105	1.3113	0.2645	1.7						2013-02-27	2013-04-05	37	1.88373	7.12186				2.96744
E2-13	Water	S-Ag	3	130	6	Int.	Intestines	1115	1.0546	1115	1.7356	0.681	1.7						2013-02-27	2013-04-05	37	1.88373	2.76613				1.15255
E2-13	Water	S-Ag	7	131	1	Int.	Intestines	1245	1.0453	1245	1.4169	0.3716	3						2013-02-27	2013-04-05	37	3.32423	8.94573	11.2196	3.40047		3.72739
E2-13	Water	S-Ag	7	132	2	Int.	Intestines	1255	1.0503	1255	1.3157	0.2654	2.1						2013-02-27	2013-04-05	37	2.32696	8.76776				3.65323
E2-13	Water	S-Ag	7	133	3	Int.	Intestines	1265	1.0519	1265	1.4864	0.4345	4.1						2013-02-27	2013-04-05	37	4.54312	10.456				4.35665
E2-13	Water	S-Ag	7	134	4	Int.	Intestines	1275	1.0579	1275	1.3938	0.3359	2.5						2013-02-27	2013-04-05	37	2.77019	8.24708				3.43628
E2-13	Water	S-Ag	7	135	5	Int.	Intestines	1285	1.0477	1285	1.4966	0.4489	6.6						2013-02-27	2013-04-05	37	7.31331	16.2916				6.78818
E2-13	Water	S-Ag	7	136	6	Int.	Intestines	1295	1.0504	1295	1.3993	0.3489	4.6						2013-02-27	2013-04-05	37	5.09716	14.6092				6.08718
E2-13	Water	S-Ag	24	137	1	Int.	Intestines	1425	1.0432	1425	1.5129	0.4697	6.3						2013-02-27	2013-04-05	37	6.98089	14.8624	16.4541	10.2583		6.19269
E2-13	Water	S-Ag	24	138	2	Int.	Intestines	1435	1.0542	1435	1.4436	0.3894	2.9						2013-02-27	2013-04-05	37	3.21343	8.25225				3.43844
E2-13	Water	S-Ag	24	139	3	Int.	Intestines	1445	1.0638	1445	1.5106	0.4468	7						2013-02-27	2013-04-05	37	7.75654	17.3602				7.23342
E2-13	Water	S-Ag	24	140	4	Int.	Intestines	1455	1.0616	1455	1.5915	0.5299	8.4						2013-02-27	2013-04-05	37	9.30785	17.5653				7.31888
E2-13	Water	S-Ag	24	141	5	Int.	Intestines	1465	1.0479	1465	1.5241	0.4762	15						2013-02-27	2013-04-05	37	16.6212	34.9038				14.5432
E2-13	Water	S-Ag	24	142	6	Int.	Intestines	1475	1.0519	1475	1.4736	0.4217	2.2						2013-02-27	2013-04-05	37	2.43777	5.78082				2.40867
E2-13	Water	S-Ag	48	143	1	Int.	Intestines	1605	1.0581	1605	1.757	0.6989	7.1						2013-02-27	2013-04-05	37	7.86735	11.2568	31.9042	19.0385		4.69032							x10_2
E2-13	Water	S-Ag	48	144	2	Int.	Intestines	1615	1.0418	1615	1.376	0.3342	14.6						2013-02-27	2013-04-05	37	16.1779	48.4079				20.17
E2-13	Water	S-Ag	48	145	3	Int.	Intestines	1625	1.0593	1625	1.486	0.4267	21.2						2013-02-27	2013-04-05	37	23.4913	55.0533				22.9389
E2-13	Water	S-Ag	48	146	4	Int.	Intestines	1635	1.0574	1635	1.5209	0.4635	9.6						2013-02-27	2013-04-05	37	10.6375	22.9505				9.5627
E2-13	Water	S-Ag	48	147	5	Int.	Intestines	1645	1.061	1645	1.4822	0.4212	15.9						2013-02-27	2013-04-05	37	17.6184	41.8291				17.4288
E2-13	Water	S-Ag	48	148	6	Int.	Intestines	1655	1.0578	1655	1.7267	0.6689	7.2						2013-02-27	2013-04-05	37	7.97816	11.9273				4.9697
E2-13	Water	Ag+	3	149	1	Ki	Kidney	1122	1.0388	1122	1.0782	0.0394	0						2013-02-27	2013-04-02	34	0	0	36.546	66.8646		0	18.273	33.4323	31.5081	19.3138
E2-13	Water	Ag+	3	150	2	Ki	Kidney	1132	1.0513	1132	1.1191	0.0678	0						2013-02-27	2013-04-02	34	0	0				0
E2-13	Water	Ag+	3	151	3	Ki	Kidney	1142	1.0598	1142	1.1351	0.0753	0						2013-02-27	2013-04-02	34	0	0				0
E2-13	Water	Ag+	3	152	4	Ki	Kidney	1152	1.0616	1152	1.1303	0.0687	0.5						2013-02-27	2013-04-02	34	0.549448	7.99779				3.99889
E2-13	Water	Ag+	3	153	5	Ki	Kidney	1162	1.0527	1162	1.0885	0.0358	5.5						2013-02-27	2013-04-02	34	6.04393	168.825				84.4124
E2-13	Water	Ag+	3	154	6	Ki	Kidney	1172	1.0409	1172	1.1082	0.0673	2.6						2013-02-27	2013-04-02	34	2.85713	42.4536				21.2268
E2-13	Water	Ag+	7	155	1	Ki	Kidney	1302	1.0484	1302	1.094	0.0456	0						2013-02-27	2013-04-02	34	0	0	48.4112	44.9571		0	24.2056	22.4785
E2-13	Water	Ag+	7	156	2	Ki	Kidney	1312	1.059	1312	1.1438	0.0848	2.3						2013-02-27	2013-04-02	34	2.52746	29.805				14.9025
E2-13	Water	Ag+	7	157	3	Ki	Kidney	1322	1.0506	1322	1.1028	0.0522	4.9						2013-02-27	2013-04-02	34	5.38459	103.153				51.5765
E2-13	Water	Ag+	7	158	4	Ki	Kidney	1332	1.0474	1332	1.1174	0.07	2.4						2013-02-27	2013-04-02	34	2.63735	37.6764				18.8382
E2-13	Water	Ag+	7	159	5	Ki	Kidney	1342	1.0563	1342	1.1087	0.0524	5						2013-02-27	2013-04-02	34	5.49448	104.856				52.4282
E2-13	Water	Ag+	7	160	6	Ki	Kidney	1352	1.0503	1352	1.109	0.0587	0.8						2013-02-27	2013-04-02	34	0.879117	14.9764				7.48822
E2-13	Water	Ag+	24	161	1	Ki	Kidney	1482	1.0625	1482	1.0999	0.0374	0						2013-02-27	2013-04-02	34	0	0	46.6844	44.2644		0	23.3422	22.1322
E2-13	Water	Ag+	24	162	2	Ki	Kidney	1492	1.0604	1492	1.155	0.0946	3.8						2013-02-27	2013-04-02	34	4.1758	44.1417				22.0708
E2-13	Water	Ag+	24	163	3	Ki	Kidney	1502	1.0508	1502	1.1121	0.0613	3						2013-02-27	2013-04-02	34	3.29669	53.7796				26.8898
E2-13	Water	Ag+	24	164	4	Ki	Kidney	1512	1.0606	1512	1.0894	0.0288	3.2						2013-02-27	2013-04-02	34	3.51647	122.1				61.0498
E2-13	Water	Ag+	24	165	5	Ki	Kidney	1522	1.0632	1522	1.1388	0.0756	0.3						2013-02-27	2013-04-02	34	0.329669	4.3607				2.18035
E2-13	Water	Ag+	24	166	6	Ki	Kidney	1532	1.0532	1532	1.1025	0.0493	2.5						2013-02-27	2013-04-02	34	2.74724	55.7249				27.8625
E2-13	Water	Ag+	48	167	1	Ki	Kidney	1662	1.0517	1662	1.1114	0.0597	3.4						2013-02-27	2013-04-02	34	3.73625	62.5837	120.423	59.9191		31.2918	60.2116	29.9595			6.02116	2.99595	x10_2
E2-13	Water	Ag+	48	168	2	Ki	Kidney	1672	1.0546	1672	1.0833	0.0287	2.4						2013-02-27	2013-04-02	34	2.63735	91.8937				45.9469
E2-13	Water	Ag+	48	169	3	Ki	Kidney	1682	1.0516	1682	1.1071	0.0555	11.5						2013-02-27	2013-04-02	34	12.6373	227.699				113.85
E2-13	Water	Ag+	48	170	4	Ki	Kidney	1692	1.0512	1692	1.1183	0.0671	5.1						2013-02-27	2013-04-02	34	5.60437	83.5226				41.7613
E2-13	Water	Ag+	48	171	5	Ki	Kidney	1702	1.0555	1702	1.0869	0.0314	3.1						2013-02-27	2013-04-02	34	3.40658	108.49				54.2448
E2-13	Water	Ag+	48	172	6	Ki	Kidney	1712	1.0485	1712	1.1085	0.06	8.1						2013-02-27	2013-04-02	34	8.90105	148.351				74.1755
E2-13	Water	Cont.	3	101	1	Ki	Kidney	1002	1.0492	1002	1.0954	0.0462	0	0.183333	0				2013-02-27	2013-04-02	34	0	0	2.33666	3.85522
E2-13	Water	Cont.	3	102	2	Ki	Kidney	1012	1.0523	1012	1.1194	0.0671	0.3		0				2013-02-27	2013-04-02	34	0.329669	4.9131
E2-13	Water	Cont.	3	103	3	Ki	Kidney	1022	1.0543	1022	1.1016	0.0473	0		0				2013-02-27	2013-04-02	34	0	0
E2-13	Water	Cont.	3	104	4	Ki	Kidney	1032	1.0443	1032	1.1305	0.0862	0		0				2013-02-27	2013-04-02	34	0	0
E2-13	Water	Cont.	3	105	5	Ki	Kidney	1042	1.0533	1042	1.0765	0.0232	0		0				2013-02-27	2013-04-02	34	0	0
E2-13	Water	Cont.	3	106	6	Ki	Kidney	1052	1.0524	1052	1.1248	0.0724	0.6		0				2013-02-27	2013-04-02	34	0.659337	9.10687
E2-13	Water	Cont.	7	107	1	Ki	Kidney	1182	1.0458	1182
E2-13	Water	Cont.	7	108	2	Ki	Kidney	1192	1.0502	1192
E2-13	Water	Cont.	7	109	3	Ki	Kidney	1202	1.0471	1202
E2-13	Water	Cont.	7	110	4	Ki	Kidney	1212	1.0512	1212
E2-13	Water	Cont.	7	111	5	Ki	Kidney	1222	1.0493	1222
E2-13	Water	Cont.	7	112	6	Ki	Kidney	1232	1.0533	1232
E2-13	Water	Cont.	24	113	1	Ki	Kidney	1362	1.0499	1362	1.1024	0.0525	0.5		0				2013-02-27	2013-04-02	34	0.549448	10.4657	6.21133	10.9216
E2-13	Water	Cont.	24	114	2	Ki	Kidney	1372	1.0473	1372	1.1214	0.0741	0		0				2013-02-27	2013-04-02	34	0	0
E2-13	Water	Cont.	24	115	4	Ki	Kidney	1382	1.058	1382	1.1345	0.0765	0		0				2013-02-27	2013-04-02	34	0	0
E2-13	Water	Cont.	24	116	3	Ki	Kidney	1392	1.0574	1392	1.1148	0.0574	1.4		0				2013-02-27	2013-04-02	34	1.53845	26.8023
E2-13	Water	Cont.	24	117	5	Ki	Kidney	1409	1.0492	1409	1.1026	0.0534	0		0				2013-02-27	2013-04-02	34	0	0
E2-13	Water	Cont.	24	118	6	Ki	Kidney	1412	1.0439	1412	1.105	0.0611	0		0				2013-02-27	2013-04-02	34	0	0
E2-13	Water	Cont.	48	119	1	Ki	Kidney	1542	1.0536	1542	1.1123	0.0587	0.3		0				2013-02-27	2013-04-02	34	0.329669	5.61616	1.43103	2.3696
E2-13	Water	Cont.	48	120	2	Ki	Kidney	1552	1.0546	1552	1.1286	0.074	0.2		0				2013-02-27	2013-04-02	34	0.219779	2.96999
E2-13	Water	Cont.	48	121	3	Ki	Kidney	1562	1.0561	1562	1.1302	0.0741	0		0				2013-02-27	2013-04-02	34	0	0
E2-13	Water	Cont.	48	122	4	Ki	Kidney	1572	1.055	1572	1.1284	0.0734	0		0				2013-02-27	2013-04-02	34	0	0
E2-13	Water	Cont.	48	123	5	Ki	Kidney	1582	1.0612	1582	1.1019	0.0407	0		0				2013-02-27	2013-04-02	34	0	0
E2-13	Water	Cont.	48	124	6	Ki	Kidney	1592	1.0557	1592	1.0813	0.0256	0		0				2013-02-27	2013-04-02	34	0	0
E2-13	Water	S-Ag	3	125	1	Ki	Kidney	1062	1.0462	1062	1.0839	0.0377	0.8						2013-02-27	2013-04-02	34	0.879117	23.3187	5.79426	9.72988		9.71614	2.41428	4.05412	10.8329	8.66314
E2-13	Water	S-Ag	3	126	2	Ki	Kidney	1072	1.0546	1072	1.093	0.0384	0.4						2013-02-27	2013-04-02	34	0.439558	11.4468				4.76951
E2-13	Water	S-Ag	3	127	3	Ki	Kidney	1082	1.0505	1082	1.115	0.0645	0						2013-02-27	2013-04-02	34	0	0				0
E2-13	Water	S-Ag	3	128	4	Ki	Kidney	1092	1.0387	1092	1.0746	0.0359	0						2013-02-27	2013-04-02	34	0	0				0
E2-13	Water	S-Ag	3	129	5	Ki	Kidney	1102	1.0563	1102	1.1161	0.0598	0						2013-02-27	2013-04-02	34	0	0				0
E2-13	Water	S-Ag	3	130	6	Ki	Kidney	1112	1.0486	1112	1.1072	0.0586	0						2013-02-27	2013-04-02	34	0	0				0
E2-13	Water	S-Ag	7	131	1	Ki	Kidney	1242	1.05	1242	1.1394	0.0894	0						2013-02-27	2013-04-02	34	0	0	17.4699	17.2931		0	7.27912	7.20547
E2-13	Water	S-Ag	7	132	2	Ki	Kidney	1252	1.0524	1252	1.1191	0.0667	0.7						2013-02-27	2013-04-02	34	0.769227	11.5326				4.80527
E2-13	Water	S-Ag	7	133	3	Ki	Kidney	1262	1.0479	1262	1.1152	0.0673	2.6						2013-02-27	2013-04-02	34	2.85713	42.4536				17.689
E2-13	Water	S-Ag	7	134	4	Ki	Kidney	1272	1.0588	1272	1.1456	0.0868	0						2013-02-27	2013-04-02	34	0	0				0
E2-13	Water	S-Ag	7	135	5	Ki	Kidney	1282	1.0481	1282	1.1666	0.1185	3.5						2013-02-27	2013-04-02	34	3.84613	32.4568				13.5237
E2-13	Water	S-Ag	7	136	6	Ki	Kidney	1292	1.0575	1292	1.1472	0.0897	1.5						2013-02-27	2013-04-02	34	1.64834	18.3762				7.65674
E2-13	Water	S-Ag	24	137	1	Ki	Kidney	1422	1.0498	1422	1.1168	0.067	0.1						2013-02-27	2013-04-02	34	0.10989	1.64014	26.1691	39.4292		0.683393	10.9038	16.4288
E2-13	Water	S-Ag	24	138	2	Ki	Kidney	1432	1.0525	1432	1.1195	0.067	0.8						2013-02-27	2013-04-02	34	0.879117	13.1211				5.46714
E2-13	Water	S-Ag	24	139	3	Ki	Kidney	1442	1.045	1442	1.0793	0.0343	3.1						2013-02-27	2013-04-02	34	3.40658	99.3171				41.3821
E2-13	Water	S-Ag	24	140	4	Ki	Kidney	1452	1.0613	1452	1.1432	0.0819	3.2						2013-02-27	2013-04-02	34	3.51647	42.9361				17.89
E2-13	Water	S-Ag	24	141	5	Ki	Kidney	1462	1.059	1462	1.0928	0.0338	0						2013-02-27	2013-04-02	34	0	0				0
E2-13	Water	S-Ag	24	142	6	Ki	Kidney	1472	1.0584	1472	1.1385	0.0801	0						2013-02-27	2013-04-02	34	0	0				0
E2-13	Water	S-Ag	48	143	1	Ki	Kidney	1602	1.0423	1602	1.1277	0.0854	6.3						2013-02-27	2013-04-02	34	6.92304	81.0661	54.5622	37.5278		33.7775	22.7343	15.6366			0.227343	0.156366	x10_2
E2-13	Water	S-Ag	48	144	2	Ki	Kidney	1612	1.0503	1612	1.1008	0.0505	2.6						2013-02-27	2013-04-02	34	2.85713	56.5768				23.5737
E2-13	Water	S-Ag	48	145	3	Ki	Kidney	1622	1.0543	1622	1.083	0.0287	3						2013-02-27	2013-04-02	34	3.29669	114.867				47.8613
E2-13	Water	S-Ag	48	146	4	Ki	Kidney	1632	1.0433	1632	1.1116	0.0683	1.3						2013-02-27	2013-04-02	34	1.42856	20.916				8.71501
E2-13	Water	S-Ag	48	147	5	Ki	Kidney	1642	1.0631	1642	1.1075	0.0444	0.9						2013-02-27	2013-04-02	34	0.989006	22.2749				9.28121
E2-13	Water	S-Ag	48	148	6	Ki	Kidney	1652	1.0563	1652	1.1361	0.0798	2.3						2013-02-27	2013-04-02	34	2.52746	31.6724				13.1968
E2-13	Water	Ag+	3	149	1	Li	Liver	1121	1.0401	1121	1.1075	0.0674	0.3						2013-02-27	2013-04-03	35	0.330584	4.90481	42.4342	22.5072		2.45241	21.2171	11.2536	214.453	212.802
E2-13	Water	Ag+	3	150	2	Li	Liver	1131	1.048	1131	1.1466	0.0986	6.2						2013-02-27	2013-04-03	35	6.83208	69.2908				34.6454
E2-13	Water	Ag+	3	151	3	Li	Liver	1141	1.0472	1141	1.1326	0.0854	4.6						2013-02-27	2013-04-03	35	5.06896	59.3555				29.6778
E2-13	Water	Ag+	3	152	4	Li	Liver	1151	1.0599	1151	1.1601	0.1002	3.1						2013-02-27	2013-04-03	35	3.41604	34.0922				17.0461
E2-13	Water	Ag+	3	153	5	Li	Liver	1161	1.0494	1161	1.0951	0.0457	2						2013-02-27	2013-04-03	35	2.2039	48.2253				24.1126
E2-13	Water	Ag+	3	154	6	Li	Liver	1171	1.0533	1171	1.1614	0.1081	3.8						2013-02-27	2013-04-03	35	4.1874	38.7364				19.3682
E2-13	Water	Ag+	7	155	1	Li	Liver	1301	1.0454	1301	1.1274	0.082	14.1						2013-02-27	2013-04-03	35	15.5375	189.481	126.388	45.2319		94.7406	63.194	22.6159
E2-13	Water	Ag+	7	156	2	Li	Liver	1311	1.0551	1311	1.1482	0.0931	11.8						2013-02-27	2013-04-03	35	13.003	139.667				69.8334
E2-13	Water	Ag+	7	157	3	Li	Liver	1321	1.053	1321	1.1449	0.0919	11.6						2013-02-27	2013-04-03	35	12.7826	139.092				69.5462
E2-13	Water	Ag+	7	158	4	Li	Liver	1331	1.0391	1331	1.1555	0.1164	12						2013-02-27	2013-04-03	35	13.2234	113.603				56.8014
E2-13	Water	Ag+	7	159	5	Li	Liver	1341	1.0529	1341	1.1248	0.0719	3.3						2013-02-27	2013-04-03	35	3.63643	50.5762				25.2881
E2-13	Water	Ag+	7	160	6	Li	Liver	1351	1.047	1351	1.1564	0.1094	12.5						2013-02-27	2013-04-03	35	13.7743	125.908				62.9541
E2-13	Water	Ag+	24	161	1	Li	Liver	1481	1.0518	1481	1.1456	0.0938	34.5						2013-02-27	2013-04-03	35	38.0172	405.301	592.866	155.725		202.65	296.433	77.8623
E2-13	Water	Ag+	24	162	2	Li	Liver	1491	1.0449	1491	1.1805	0.1356	98.1						2013-02-27	2013-04-03	35	108.101	797.206				398.603
E2-13	Water	Ag+	24	163	3	Li	Liver	1501	1.0515	1501	1.1309	0.0794	33.3						2013-02-27	2013-04-03	35	36.6949	462.152				231.076
E2-13	Water	Ag+	24	164	4	Li	Liver	1511	1.0497	1511	1.1488	0.0991	46						2013-02-27	2013-04-03	35	50.6896	511.5				255.75
E2-13	Water	Ag+	24	165	5	Li	Liver	1521	1.0576	1521	1.1472	0.0896	58.4						2013-02-27	2013-04-03	35	64.3538	718.234				359.117
E2-13	Water	Ag+	24	166	6	Li	Liver	1531	1.0447	1531	1.1255	0.0808	48.6						2013-02-27	2013-04-03	35	53.5547	662.805				331.403
E2-13	Water	Ag+	48	167	1	Li	Liver	1661	1.0595	1661	1.1429	0.0834	78.8						2013-02-27	2013-04-03	35	86.8335	1041.17	953.933	185.413		520.585	476.967	92.7064			4.76967	0.927064	x10_2
E2-13	Water	Ag+	48	168	2	Li	Liver	1671	1.0549	1671	1.1355	0.0806	88.5						2013-02-27	2013-04-03	35	97.5224	1209.96				604.978
E2-13	Water	Ag+	48	169	3	Li	Liver	1681	1.0624	1681	1.1607	0.0983	89.7						2013-02-27	2013-04-03	35	98.8447	1005.54				502.771
.	Water	Ag+	48	170	4	Li	Liver	1691	1.0558	1691	1.1558	0.1	85.4						2013-02-27	2013-04-03	35	94.1064	941.064				470.532
E2-13	Water	Ag+	48	171	5	Li	Liver	1701	1.062	1701	1.1328	0.0708	55.9						2013-02-27	2013-04-03	35	61.5989	870.041				435.02
E2-13	Water	Ag+	48	172	6	Li	Liver	1711	1.0557	1711	1.1424	0.0867	51.6						2013-02-27	2013-04-03	35	56.8605	655.831				327.915
E2-13	Water	Cont.	3		1	Li	Liver	1001	1.0528	1001	1.1585	0.1057	0	0.322222	0				2013-02-27	2013-04-03	35	0	0	0	0
E2-13	Water	Cont.	3		2	Li	Liver	1011	1.0551	1011	1.203	0.1479	0		0				2013-02-27	2013-04-03	35	0	0
E2-13	Water	Cont.	3		3	Li	Liver	1021	1.048	1021	1.1619	0.1139	0		0				2013-02-27	2013-04-03	35	0	0
E2-13	Water	Cont.	3		4	Li	Liver	1031	1.0363	1031	1.1598	0.1235	0		0				2013-02-27	2013-04-03	35	0	0
E2-13	Water	Cont.	3		5	Li	Liver	1041	1.0378	1041	1.1326	0.0948	0		0				2013-02-27	2013-04-03	35	0	0
E2-13	Water	Cont.	3		6	Li	Liver	1051	1.0558	1051	1.1798	0.124	0		0				2013-02-27	2013-04-03	35	0	0
E2-13	Water	Cont.	7		1	Li	Liver	1181	1.0446	1181
E2-13	Water	Cont.	7		2	Li	Liver	1191	1.0427	1191
E2-13	Water	Cont.	7		3	Li	Liver	1201	1.0459	1201
E2-13	Water	Cont.	7		4	Li	Liver	1211	1.046	1211
E2-13	Water	Cont.	7		5	Li	Liver	1221	1.0586	1221
E2-13	Water	Cont.	7		6	Li	Liver	1231	1.0383	1231
E2-13	Water	Cont.	24		1	Li	Liver	1361	1.062	1361	1.1785	0.1165	0		0				2013-02-27	2013-04-03	35	0	0	6.55921	16.0667
E2-13	Water	Cont.	24		2	Li	Liver	1371	1.0581	1371	1.1626	0.1045	0		0				2013-02-27	2013-04-03	35	0	0
E2-13	Water	Cont.	24		4	Li	Liver	1381	1.0553	1381	1.1994	0.1441	0		0				2013-02-27	2013-04-03	35	0	0
E2-13	Water	Cont.	24		3	Li	Liver	1391	1.0475	1391	1.1399	0.0924	3.3		0				2013-02-27	2013-04-03	35	3.63643	39.3553
E2-13	Water	Cont.	24		5	Li	Liver	1401	1.0602	1401	1.1572	0.097	0		0				2013-02-27	2013-04-03	35	0	0
E2-13	Water	Cont.	24		6	Li	Liver	1411	1.0495	1411	1.1411	0.0916	0		0				2013-02-27	2013-04-03	35	0	0
E2-13	Water	Cont.	48		1	Li	Liver	1541	1.0553	1541	1.1772	0.1219	1.5		0				2013-02-27	2013-04-03	35	1.65292	13.5597	4.46733	5.59701
E2-13	Water	Cont.	48		2	Li	Liver	1551	1.0519	1551	1.1534	0.1015	0.3		0				2013-02-27	2013-04-03	35	0.330584	3.25699
E2-13	Water	Cont.	48		3	Li	Liver	1561	1.0627	1561	1.1764	0.1137	0		0				2013-02-27	2013-04-03	35	0	0
E2-13	Water	Cont.	48		4	Li	Liver	1571	1.0498	1571	1.1609	0.1111	0.1		0				2013-02-27	2013-04-03	35	0.110195	0.991852
E2-13	Water	Cont.	48		5	Li	Liver	1581	1.0479	1581	1.1214	0.0735	0.6		0				2013-02-27	2013-04-03	35	0.661169	8.99549
E2-13	Water	Cont.	48		6	Li	Liver	1591	1.0503	1591	1.0989	0.0486	0		0				2013-02-27	2013-04-03	35	0	0
E2-13	Water	S-Ag	3		1	Li	Liver	1061	1.038	1061	1.0938	0.0558	1.6						2013-02-27	2013-04-03	35	1.76312	31.5971	23.4162	18.0416		13.1654	9.75674	7.51734	98.8249	99.3658	0.0975674	0.0751734	x10_2
E2-13	Water	S-Ag	3		2	Li	Liver	1071	1.0376	1071	1.1158	0.0782	1.2						2013-02-27	2013-04-03	35	1.32234	16.9097				7.0457
E2-13	Water	S-Ag	3		3	Li	Liver	1081	1.0526	1081	1.1449	0.0923	2.8						2013-02-27	2013-04-03	35	3.08545	33.4285				13.9286
E2-13	Water	S-Ag	3		4	Li	Liver	1091	1.0525	1091	1.1476	0.0951	0.8						2013-02-27	2013-04-03	35	0.881558	9.2698				3.86242
E2-13	Water	S-Ag	3		5	Li	Liver	1101	1.0406	1101	1.1246	0.084	0						2013-02-27	2013-04-03	35	0	0				0
E2-13	Water	S-Ag	3		6	Li	Liver	1111	1.0532	1111	1.1538	0.1006	4.5						2013-02-27	2013-04-03	35	4.95877	49.2919				20.5383
E2-13	Water	S-Ag	7		1	Li	Liver	1241	1.0568	1241	1.1649	0.1081	10.3						2013-02-27	2013-04-03	35	11.3501	104.996	73.7487	39.2108		43.7483	30.7286	16.3378
E2-13	Water	S-Ag	7		2	Li	Liver	1251	1.0436	1251	1.122	0.0784	0						2013-02-27	2013-04-03	35	0	0				0
E2-13	Water	S-Ag	7		3	Li	Liver	1261	1.0478	1261	1.1481	0.1003	9.9						2013-02-27	2013-04-03	35	10.9093	108.767				45.3194
E2-13	Water	S-Ag	7		4	Li	Liver	1271	1.0561	1271	1.1644	0.1083	7.8						2013-02-27	2013-04-03	35	8.59519	79.3647				33.0686
E2-13	Water	S-Ag	7		5	Li	Liver	1281	1.0486	1281	1.1942	0.1456	10.2						2013-02-27	2013-04-03	35	11.2399	77.1969				32.1654
E2-13	Water	S-Ag	7		6	Li	Liver	1291	1.0386	1291	1.1577	0.1191	7.8						2013-02-27	2013-04-03	35	8.59519	72.1679				30.0699
E2-13	Water	S-Ag	24		1	Li	Liver	1421	1.0467	1421	1.1217	0.075	23.2						2013-02-27	2013-04-03	35	25.5652	340.869	309.432	139.717		142.029	128.93	58.2155
E2-13	Water	S-Ag	24		2	Li	Liver	1431	1.0632	1431	1.1737	0.1105	24.1						2013-02-27	2013-04-03	35	26.5569	240.334				100.139
E2-13	Water	S-Ag	24		3	Li	Liver	1441	1.0487	1441	1.0819	0.0332	1.9						2013-02-27	2013-04-03	35	2.0937	63.0633				26.2764
E2-13	Water	S-Ag	24		4	Li	Liver	1451	1.0626	1451	1.1896	0.127	52.5						2013-02-27	2013-04-03	35	57.8523	455.53				189.804
E2-13	Water	S-Ag	24		5	Li	Liver	1463	1.0508	1463	1.14	0.0892	31.6						2013-02-27	2013-04-03	35	34.8216	390.376				162.657
E2-13	Water	S-Ag	24		6	Li	Liver	1471	1.0432	1471	1.1662	0.123	40.9						2013-02-27	2013-04-03	35	45.0697	366.42				152.675
E2-13	Water	S-Ag	48		1	Li	Liver	1601	1.0434	1601	1.1829	0.1395	89.5						2013-02-27	2013-04-03	35	98.6243	706.984	542.122	180.965		294.577	225.884	75.4023			2.25884	0.754023	x10_2
E2-13	Water	S-Ag	48		2	Li	Liver	1611	1.062	1611	1.149	0.087	25.4						2013-02-27	2013-04-03	35	27.9895	321.718				134.049
E2-13	Water	S-Ag	48		3	Li	Liver	1621	1.0503	1621	1.1236	0.0733	29.9						2013-02-27	2013-04-03	35	32.9482	449.499				187.291
E2-13	Water	S-Ag	48		4	Li	Liver	1631	1.0521	1631	1.1399	0.0878	60.2						2013-02-27	2013-04-03	35	66.3373	755.55				314.812
E2-13	Water	S-Ag	48		5	Li	Liver	1641	1.056	1641	1.1545	0.0985	56.8						2013-02-27	2013-04-03	35	62.5906	635.438				264.766
E2-13	Water	S-Ag	48		6	Li	Liver	1651	1.0528	1651	1.1637	0.1109	38.6						2013-02-27	2013-04-03	35	42.5352	383.545				159.811
E2-13	Water	Ag+	3		1	Mi	Spleen	1128	1.0399	1128	1.0656	0.0257	2.7						2013-02-27	2013-04-02	34	2.96702	115.448	110.816	219.791		57.7241
E2-13	Water	Ag+	3		2	Mi	Spleen	1138	1.0567	1138	1.0613	0.0046	2.3						2013-02-27	2013-04-02	34	2.52746	549.448				274.724
E2-13	Water	Ag+	3		3	Mi	Spleen	1148	1.0553	1148	1.0653	0.01	0						2013-02-27	2013-04-02	34	0	0				0
E2-13	Water	Ag+	3		4	Mi	Spleen	1158	1.0486	1158	1.0584	0.0098	0						2013-02-27	2013-04-02	34	0	0				0
E2-13	Water	Ag+	3		5	Mi	Spleen	1168	1.0528	1168	1.0606	0.0078	0						2013-02-27	2013-04-02	34	0	0				0
E2-13	Water	Ag+	3		6	Mi	Spleen	1178	1.0412	1178	1.0453	0.0041	0						2013-02-27	2013-04-02	34	0	0				0
E2-13	Water	Ag+	7		1	Mi	Spleen	1308	1.0473	1308	1.053	0.0057	1.4						2013-02-27	2013-04-02	34	1.53845	269.904	152.856	103.353		134.952
E2-13	Water	Ag+	7		2	Mi	Spleen	1318	1.0461	1318	1.0537	0.0076	1.7						2013-02-27	2013-04-02	34	1.86812	245.806				122.903
E2-13	Water	Ag+	7		3	Mi	Spleen	1328	1.0598	1328	1.0696	0.0098	0						2013-02-27	2013-04-02	34	0	0				0
E2-13	Water	Ag+	7		4	Mi	Spleen	1338	1.0495	1338	1.0597	0.0102	1.8						2013-02-27	2013-04-02	34	1.97801	193.923				96.9614
E2-13	Water	Ag+	7		5	Mi	Spleen	1348	1.0446	1348	1.0506	0.006	0.7						2013-02-27	2013-04-02	34	0.769227	128.204				64.1022
E2-13	Water	Ag+	7		6	Mi	Spleen	1358	1.0549	1358	1.0646	0.0097	0.7						2013-02-27	2013-04-02	34	0.769227	79.3017				39.6509
E2-13	Water	Ag+	24		1	Mi	Spleen	1488	1.0487	1488	1.0555	0.0068	0.2						2013-02-27	2013-04-02	34	0.219779	32.3205	47.8561	102.21		16.1602
E2-13	Water	Ag+	24		2	Mi	Spleen	1498	1.0485	1498	1.0595	0.011	0						2013-02-27	2013-04-02	34	0	0				0
E2-13	Water	Ag+	24		3	Mi	Spleen	1508	1.0509	1508	1.0578	0.0069	1.6						2013-02-27	2013-04-02	34	1.75823	254.816				127.408
E2-13	Water	Ag+	24		4	Mi	Spleen	1518	1.0605	1518	1.0693	0.0088	0						2013-02-27	2013-04-02	34	0	0				0
E2-13	Water	Ag+	24		5	Mi	Spleen	1528	1.0628	1528	1.069	0.0062	0						2013-02-27	2013-04-02	34	0	0				0
E2-13	Water	Ag+	24		6	Mi	Spleen	1538	1.0453	1538	1.0485	0.0032	0						2013-02-27	2013-04-02	34	0	0				0
E2-13	Water	Ag+	48		1	Mi	Spleen	1668	1.0478	1668	1.0544	0.0066	0						2013-02-27	2013-04-02	34	0	0	68.1886	87.0295		0
E2-13	Water	Ag+	48		2	Mi	Spleen	1678	1.06	1678	1.0662	0.0062	0.5						2013-02-27	2013-04-02	34	0.549448	88.6206				44.3103
E2-13	Water	Ag+	48		3	Mi	Spleen	1688	1.0588	1688	1.0698	0.011	0						2013-02-27	2013-04-02	34	0	0				0
E2-13	Water	Ag+	48		4	Mi	Spleen	1698	1.0431	1698	1.0527	0.0096	1.9						2013-02-27	2013-04-02	34	2.0879	217.49				108.745
E2-13	Water	Ag+	48		5	Mi	Spleen	1708	1.0567	1708	1.0634	0.0067	0						2013-02-27	2013-04-02	34	0	0				0
E2-13	Water	Ag+	48		6	Mi	Spleen	1718	1.0473	1718	1.0537	0.0064	0.6						2013-02-27	2013-04-02	34	0.659337	103.021				51.5107
E2-13	Water	Cont.	3		1	Mi	Spleen	1008	1.0414	1008	1.0557	0.0143	1.7	0.466667	0				2013-02-27	2013-04-02	34	1.86812	130.638	62.3988	84.3284
E2-13	Water	Cont.	3		2	Mi	Spleen	1018	1.0453	1018	1.0571	0.0118	0		0				2013-02-27	2013-04-02	34	0	0
E2-13	Water	Cont.	3		3	Mi	Spleen	1028	1.0433	1028	1.0501	0.0068	0		0				2013-02-27	2013-04-02	34	0	0
E2-13	Water	Cont.	3		4	Mi	Spleen	1038	1.0383	1038	1.0523	0.014	0		0				2013-02-27	2013-04-02	34	0	0
E2-13	Water	Cont.	3		5	Mi	Spleen	1048	1.0592	1048	1.0692	0.01	0.4		0				2013-02-27	2013-04-02	34	0.439558	43.9558
E2-13	Water	Cont.	3		6	Mi	Spleen	1058	1.0404	1058	1.0525	0.0121	2.2		0				2013-02-27	2013-04-02	34	2.41757	199.799
E2-13	Water	Cont.	7		1	Mi	Spleen	1188	1.0413	1188
E2-13	Water	Cont.	7		2	Mi	Spleen	1198	1.0455	1198
E2-13	Water	Cont.	7		3	Mi	Spleen	1208	1.046	1208
E2-13	Water	Cont.	7		4	Mi	Spleen	1218	1.0541	1218
E2-13	Water	Cont.	7		5	Mi	Spleen	1228	1.0461	1228
E2-13	Water	Cont.	7		6	Mi	Spleen	1238	1.0409	1238
E2-13	Water	Cont.	24		1	Mi	Spleen	1368	1.0491	1368	1.0646	0.0155	0		0				2013-02-27	2013-04-02	34	0	0	40.1757	51.7206
E2-13	Water	Cont.	24		2	Mi	Spleen	1378	1.0619	1378	1.0709	0.009	0.4		0				2013-02-27	2013-04-02	34	0.439558	48.8398
E2-13	Water	Cont.	24		4	Mi	Spleen	1388	1.0504	1388	1.0731	0.0227	1.3		0				2013-02-27	2013-04-02	34	1.42856	62.9324
E2-13	Water	Cont.	24		3	Mi	Spleen	1398	1.0605	1398	1.0554	-0.0051	0		0				2013-02-27	2013-04-02	34	0	0
E2-13	Water	Cont.	24		5	Mi	Spleen	1408	1.0435	1408	1.0465	0.003	0		0				2013-02-27	2013-04-02	34	0	0
E2-13	Water	Cont.	24		6	Mi	Spleen	1418	1.0593	1418	1.0661	0.0068	0.8		0				2013-02-27	2013-04-02	34	0.879117	129.282
E2-13	Water	Cont.	48		1	Mi	Spleen	1548	1.0485	1548	1.0529	0.0044	0		0				2013-02-27	2013-04-02	34	0	0	65.2011	131.88
E2-13	Water	Cont.	48		2	Mi	Spleen	1558	1.0422	1558	1.0569	0.0147	0		0				2013-02-27	2013-04-02	34	0	0
E2-13	Water	Cont.	48		3	Mi	Spleen	1568	1.054	1568	1.0665	0.0125	0.7		0				2013-02-27	2013-04-02	34	0.769227	61.5382
E2-13	Water	Cont.	48		4	Mi	Spleen	1578	1.0485	1578	1.0814	0.0329	0		0				2013-02-27	2013-04-02	34	0	0
E2-13	Water	Cont.	48		5	Mi	Spleen	1588	1.0532	1588	1.0685	0.0153	0		0				2013-02-27	2013-04-02	34	0	0
E2-13	Water	Cont.	48		6	Mi	Spleen	1598	1.0486	1598	1.0516	0.003	0.9		0				2013-02-27	2013-04-02	34	0.989006	329.669
E2-13	Water	S-Ag	3		1	Mi	Spleen	1068	1.0444	1068	1.0547	0.0103	0						2013-02-27	2013-04-02	34	0	0	36.6299	89.7245		0
E2-13	Water	S-Ag	3		2	Mi	Spleen	1078	1.0463	1078	1.0484	0.0021	0						2013-02-27	2013-04-02	34	0	0				0
E2-13	Water	S-Ag	3		3	Mi	Spleen	1088	1.0583	1088	1.0697	0.0114	0						2013-02-27	2013-04-02	34	0	0				0
E2-13	Water	S-Ag	3		4	Mi	Spleen	1098	1.0558	1098	1.0598	0.004	0.8						2013-02-27	2013-04-02	34	0.879117	219.779				91.5746
E2-13	Water	S-Ag	3		5	Mi	Spleen	1108	1.0486	1108	1.0549	0.0063	0						2013-02-27	2013-04-02	34	0	0				0
E2-13	Water	S-Ag	3		6	Mi	Spleen	1118	1.0491	1118	1.0632	0.0141	0						2013-02-27	2013-04-02	34	0	0				0
E2-13	Water	S-Ag	7		1	Mi	Spleen	1248	1.0503	1248	1.0563	0.006	0						2013-02-27	2013-04-02	34	0	0	65.2122	101.061		0
E2-13	Water	S-Ag	7		2	Mi	Spleen	1258	1.0595	1258	1.0727	0.0132	2.3						2013-02-27	2013-04-02	34	2.52746	191.474				79.7809
E2-13	Water	S-Ag	7		3	Mi	Spleen	1268	1.0499	1268	1.0608	0.0109	0						2013-02-27	2013-04-02	34	0	0				0
E2-13	Water	S-Ag	7		4	Mi	Spleen	1278	1.0462	1278	1.0578	0.0116	0						2013-02-27	2013-04-02	34	0	0				0
E2-13	Water	S-Ag	7		5	Mi	Spleen	1288	1.0479	1288	1.0578	0.0099	1.8						2013-02-27	2013-04-02	34	1.97801	199.799				83.2497
E2-13	Water	S-Ag	7		6	Mi	Spleen	1298	1.0483	1298	1.056	0.0077	0						2013-02-27	2013-04-02	34	0	0				0
E2-13	Water	S-Ag	24		1	Mi	Spleen	1428	1.0592	1428	1.0625	0.0033	0						2013-02-27	2013-04-02	34	0	0	33.738	82.6409		0
E2-13	Water	S-Ag	24		2	Mi	Spleen	1438	1.0497	1438	1.0641	0.0144	0						2013-02-27	2013-04-02	34	0	0				0
E2-13	Water	S-Ag	24		3	Mi	Spleen	1448	1.0582	1448	1.062	0.0038	0.7						2013-02-27	2013-04-02	34	0.769227	202.428				84.3451
E2-13	Water	S-Ag	24		4	Mi	Spleen	1458	1.0566	1458	1.0673	0.0107	0						2013-02-27	2013-04-02	34	0	0				0
E2-13	Water	S-Ag	24		5	Mi	Spleen	1468	1.0566	1468	1.0697	0.0131	0						2013-02-27	2013-04-02	34	0	0				0
E2-13	Water	S-Ag	24		6	Mi	Spleen	1478	1.0448	1478	1.0581	0.0133	0						2013-02-27	2013-04-02	34	0	0				0
E2-13	Water	S-Ag	48		1	Mi	Spleen	1608	1.0581	1608	1.0709	0.0128	0						2013-02-27	2013-04-02	34	0	0	114.146	200.228		0
E2-13	Water	S-Ag	48		2	Mi	Spleen	1618	1.0494	1618	1.0571	0.0077	3.6						2013-02-27	2013-04-02	34	3.95602	513.769				214.071
E2-13	Water	S-Ag	48		3	Mi	Spleen	1628	1.0582	1628	1.062	0.0038	0						2013-02-27	2013-04-02	34	0	0				0
E2-13	Water	S-Ag	48		4	Mi	Spleen	1638	1.0629	1638	1.0727	0.0098	0.8						2013-02-27	2013-04-02	34	0.879117	89.7058				37.3774
E2-13	Water	S-Ag	48		5	Mi	Spleen	1648	1.0508	1648	1.0535	0.0027	0.2						2013-02-27	2013-04-02	34	0.219779	81.3997				33.9165
E2-13	Water	S-Ag	48		6	Mi	Spleen	1658	1.0511	1658	1.0587	0.0076	0						2013-02-27	2013-04-02	34	0	0				0

## Sheet: pH,conductivity, Temperature
		pH	Conductivity (µS/cm)	Temperature (ºC)
		6.96	44	9.9
		6.63	44	9.9
		6.59	44	9.9
		6.9	44	10
		7	45	10.1
		6.96	44	9.9
		6.58	44	9.8
		6.55	45	9.8
		6.85	45	10
		7.05	45	10.1
		6.86	44	9.7
		6.48	45	9.7
		6.55	45	9.7
		6.8	45	9.9
		6.73	46	9.9
	Mean	6.766	44.6	9.88667
	Standard deviation	0.190143	0.632456	0.130201
